# Supplementary material for: Gene Expression Profiling of Peri-Implant Healing of PLGA-Li+ Implants Suggests an Activated Wnt Signaling Pathway In Vivo
Source: PLoS One. 2014 Jul 21;9(7):e102597. doi: 10.1371/journal.pone.0102597 (PMC4105622; doi:10.1371/journal.pone.0102597)
Supplement: Table S4 — List of all differentially regulated genes between Li+ day 28 vs. 7 (p<0.05, no specific fold change (FC) limit). Genes with a positive FC indicate genes upregulated at 28 days and negative FC values indicates downregulated genes. (XLSX) [file pone.0102597.s004.xlsx]

## Sheet: Blad1
	Table S4. List of all differentially regulated genes between Li+ day 28 vs. 7 (p< 0.05, no specific fold change (FC) limit).
	Genes with a positive FC indicate genes upregulated at 28 days negative FC values indicates downregulated genes.
	Probe Set ID	Gene Accession	Gene Symbol	Gene Description	FC Li+ day 28 vs. 7	P-value
	17644564	NM_001105772	Prss34	protease, serine, 34	3.45	0.035
	17825068	---	---	---	2.82	0.0474
	17647364	---	---	---	2.79	0.0065
	17784321	---	---	---	2.7	0.00376
	17792068	---	---	---	2.56	0.0137
	17791938	ENSRNOT00000068367 // ENSRNOT00000068367 // ENSRNOT00000068367 // ENSRNOT00000068367 // ENSRNOT00000068367 // ENSRNOT00000068367	LOC100364188 // LOC100363970 // LOC100363617 // LOC690580 // LOC690499 // LOC690471	rCG64263-like // rCG64263-like // rCG64263-like // Ig kappa chain V-VI region NQ2-17,4,1-like // Ig kappa chain V-VI region NQ2-17,4,1-like // Ig kappa chain V-VI region NQ2-17,4,1-like	2.47	0.0119
	17825011	---	---	---	2.16	0.0294
	17644586	XM_001059769	RGD1559662	similar to implantation serine proteinase 2	2.15	0.000886
	17791916	---	---	---	2.11	0.0497
	17772383	---	---	---	2.04	0.00286
	17824957	ENSRNOT00000042987	RGD1565133	similar to immunoglobulin heavy chain	2.03	0.047
	17696218	XM_002725004	LOC686087	similar to motile sperm domain containing 1	2	0.0239
	17838226	XM_216959	LOC300024	similar to Ly6-B antigen gene	1.94	0.0398
	17772066	---	---	---	1.9	7.34e-05
	17791895	---	---	---	1.9	0.0245
	17784306	---	---	---	1.9	0.00101
	17784007	XM_001071128	Mmrn1	multimerin 1	1.88	0.00409
	17681792	XM_001065477	Sh2d1b2	SH2 domain protein 1B2	1.88	0.00382
	17748135	NM_201417	Rxfp1	relaxin/insulin-like family peptide receptor 1	1.87	0.00388
	17679454	NM_001107167	Serpinb11	serpin peptidase inhibitor, clade B, member 11	1.86	0.0189
	17695867	---	---	---	1.85	0.00276
	17751785	NM_001013202	Clca2	chloride channel calcium activated 2	1.84	0.0154
	17861862	---	---	---	1.84	0.00644
	17837148	NM_021697	Kcnv1	potassium channel, subfamily V, member 1	1.82	0.0468
	17825081	ENSRNOT00000044309	RGD1561247	similar to IG HEAVY CHAIN V REGION VH558 A1/A4 PRECURSOR	1.8	0.00504
	17828153	---	---	---	1.8	0.0317
	17703140	XM_003752804	LOC100912724	mast cell protease 8-like	1.8	0.0015
	17768666	---	---	---	1.79	0.0123
	17699080	NM_019323	Mcpt9	mast cell protease 9	1.79	0.00845
	17825091	ENSRNOT00000056771 // ENSRNOT00000056771	LOC100364733 // LOC691939	Igh-6 protein-like // Ig heavy chain V-II region SESS-like	1.79	0.00924
	17692724	---	---	---	1.79	0.0168
	17825000	---	---	---	1.78	0.0294
	17791875	ENSRNOT00000031103	LOC682821	Ig kappa chain V-I region HK102-like	1.78	0.0487
	17880704	XM_003749464	LOC690872	hypothetical protein LOC690872	1.77	0.00467
	17764480	---	---	---	1.77	0.00131
	17860243	---	---	---	1.77	0.00131
	17774021	---	---	---	1.77	0.00885
	17862561	NM_001192001	Treml1	triggering receptor expressed on myeloid cells-like 1	1.75	0.000242
	17784247	ENSRNOT00000050341 // ENSRNOT00000050341 // ENSRNOT00000050341 // ENSRNOT00000050341	RGD1565252 // RGD1565252 // RGD1565252 // RGD1565252	similar to immunoglobulin kappa-chain // similar to immunoglobulin kappa-chain // similar to immunoglobulin kappa-chain // similar to immunoglobulin kappa-chain	1.73	0.0136
	17824930	BC092592 // BC092592 // BC092592	Igha // Igha // Igha	immunoglobulin heavy chain, alpha // immunoglobulin heavy chain, alpha // immunoglobulin heavy chain, alpha	1.73	0.0222
	17851106	NM_024140	Nrgn	neurogranin	1.72	0.00169
	17784634	---	---	---	1.7	0.0372
	17656505	ENSRNOT00000058484	Fam183b	family with sequence similarity 183, member B	1.69	0.003
	17784205	---	---	---	1.69	0.0141
	17756335	---	---	---	1.69	0.00589
	17666423	ENSRNOT00000040884	Gp5	glycoprotein V (platelet)	1.69	0.00605
	17817227	---	---	---	1.68	0.0242
	17785264	ENSRNOT00000013282	Gp9	glycoprotein IX (platelet)	1.67	0.00361
	17787560	NM_001191978	Clec1b	C-type lectin domain family 1, member B	1.67	0.00648
	17679473	NM_021696	Serpinb2	serpin peptidase inhibitor, clade B (ovalbumin), member 2	1.67	0.0177
	17641711	---	---	---	1.67	0.00969
	17647885	NM_001109654	Gp1ba	glycoprotein Ib (platelet), alpha polypeptide	1.66	0.00694
	17724641	NM_001012740	Cbln2	cerebellin 2 precursor	1.66	0.00807
	17681500	ENSRNOT00000003759	Selp	selectin P	1.65	0.00207
	17722027	---	---	---	1.64	4.12e-05
	17666965	NM_053930	Gp1bb	glycoprotein Ib (platelet), beta polypeptide	1.64	0.00137
	17661913	ENSRNOT00000036112	Itga2b	integrin, alpha 2B	1.63	0.00713
	17670116	---	---	---	1.63	0.0327
	17825084	---	---	---	1.62	0.0161
	17666019	ENSRNOT00000045639 // ENSRNOT00000045639	Stfa2l3 // Stfa2l2	stefin A2-like 3 // stefin A2-like 2	1.62	0.0354
	17658054	NM_001105798	Alox12	arachidonate 12-lipoxygenase	1.62	0.00161
	17697902	---	---	---	1.62	0.0228
	17864112	---	---	---	1.62	0.00159
	17824985	---	---	---	1.61	0.0495
	17764262	NM_001100528	Rag2	recombination activating gene 2	1.61	0.0022
	17860542	---	---	---	1.61	0.000802
	17821249	---	---	---	1.59	0.0141
	17716193	XM_341541	RGD1564129	similar to hypothetical protein 4930474N05	1.59	0.0118
	17870146	ENSRNOT00000041850 // ENSRNOT00000041850 // ENSRNOT00000041850 // ENSRNOT00000041850 // ENSRNOT00000041850 // ENSRNOT00000041850 // ENSRNOT00000041850 // ENSRNOT00000041850 // ENSRNOT00000041850 // ENSRNOT00000041850 // ENSRNOT00000041850 // ENSRNOT00000041850 // ENSRNOT00000041850 // ENSRNOT00000041850 // ENSRNOT00000041850 // ENSRNOT00000041850 // ENSRNOT00000041850 // ENSRNOT00000041850 // ENS…	LOC100364306 // LOC691410 // LOC691403 // LOC690867 // LOC690626 // LOC690523 // LOC690439 // LOC690281 // LOC690122 // LOC690010 // LOC689948 // LOC689905 // LOC689837 // LOC689667 // LOC689658 // LOC688732 // LOC688587 // LOC688428 // LOC687062 // LOC686719 // LOC686131 // LOC686017 // LOC685989 // LOC685966 // LOC685853 // LOC680748 // LOC680198 // LOC501349 // LOC501299 // LOC100364306 // LOC…	hypothetical protein LOC100364306 // similar to Discs large homolog 5 (Placenta and prostate DLG) (Discs large protein P-dlg) // hypothetical protein LOC691403 // similar to Discs large homolog 5 (Placenta and prostate DLG) (Discs large protein P-dlg) // hypothetical protein LOC690626 // hypothetical protein LOC690523 // similar to spermatogenesis associated glutamate (E)-rich protein 4d // simil…	1.58	0.0127
	17633519	---	---	---	1.58	0.0299
	17789082	---	---	---	1.57	0.0147
	17681422	ENSRNOT00000004386	Myoc	myocilin	1.57	0.00831
	17724702	NM_001107370	Cd226	CD226 molecule	1.57	0.0139
	17703732	NM_001025751	Blk	B lymphoid tyrosine kinase	1.57	0.00175
	17636248	NM_001105211	Mrvi1	murine retrovirus integration site 1 homolog	1.57	0.00229
	17725099	ENSRNOT00000020697	Klhl14	kelch-like 14 (Drosophila)	1.56	0.0007
	17719626	---	---	---	1.56	0.00792
	17666241	NM_001107089	Muc20	mucin 20, cell surface associated	1.56	0.00935
	17792051	ENSRNOT00000048477	LOC502842	Ig kappa chain V-III region MOPC 321-like	1.56	0.0172
	17726963	NM_053459	Rab27b	RAB27B, member RAS oncogene family	1.56	0.00802
	17793982	ENSRNOT00000013889	Tmem40	transmembrane protein 40	1.55	0.00231
	17665416	---	---	---	1.55	0.0163
	17796649	NM_001024339	Tuba8	tubulin, alpha 8	1.55	0.00986
	17794983	---	---	---	1.55	0.00369
	17686046	NM_144737	Fmo2	flavin containing monooxygenase 2	1.54	0.0128
	17776835	NM_017016	Hdc	histidine decarboxylase	1.54	0.00986
	17737576	---	---	---	1.54	0.0126
	17844092	NM_001109599	Pou2af1	POU class 2 associating factor 1	1.53	0.00597
	17666009	---	---	---	1.53	0.00203
	17670580	NM_001000042	Olr1569	olfactory receptor 1569	1.53	0.041
	17845272	NM_001173426	Rbpms2	RNA binding protein with multiple splicing 2	1.52	0.000687
	17783542	NM_012614	Npy	neuropeptide Y	1.52	0.00522
	17752836	NM_001003976	G6b	G6b protein	1.52	0.00809
	17686944	NM_001191674	Pld5	phospholipase D family, member 5	1.52	0.00545
	17644351	NM_001191589	Rpl3l	ribosomal protein L3-like	1.52	0.0131
	17679910	NM_001014843	Faim3	Fas apoptotic inhibitory molecule 3	1.52	3.4e-05
	17791880	---	---	---	1.52	0.00716
	17710569	NM_001014140	RGD1309676	similar to RIKEN cDNA 5730469M10	1.52	0.00671
	17740279	---	---	---	1.51	0.00563
	17750061	---	---	---	1.51	0.0128
	17792086	XM_002729380	LOC502837	Ig kappa chain V19-17-like	1.51	8.73e-05
	17611159	NM_001044295	Tpd52l1	tumor protein D52-like 1	1.51	0.0109
	17806775	NM_001015016	Cd72	Cd72 molecule	1.51	0.00132
	17856790	NM_001106872	Ccr1l1	chemokine (C-C motif) receptor 1-like 1	1.51	0.0153
	17803502	NM_031598	Pla2g2a	phospholipase A2, group IIA (platelets, synovial fluid)	1.51	0.00512
	17795992	---	---	---	1.51	0.00527
	17720606	ENSRNOT00000067990	Prkcq	protein kinase C, theta	1.51	0.00488
	17809971	AB235197 // AB235197	Mpl // Mpl	myeloproliferative leukemia virus oncogene // myeloproliferative leukemia virus oncogene	1.51	0.00174
	17721629	ENSRNOT00000022744	Hrh4	histamine receptor H4	1.5	0.0207
	17693483	ENSRNOT00000003794	Ppbp	pro-platelet basic protein (chemokine (C-X-C motif) ligand 7)	1.5	0.0164
	17640675	ENSRNOT00000028433	Ms4a1	membrane-spanning 4-domains, subfamily A, member 1	1.5	0.00293
	17807457	XM_345535	Epb4,1l4b	erythrocyte protein band 4,1-like 4b	1.5	0.0158
	17792083	ENSRNOT00000043097	LOC500192	Ig kappa chain V-IV region-like	1.49	0.0184
	17712909	---	---	---	1.49	0.0167
	17824981	ENSRNOT00000067112 // ENSRNOT00000067112	LOC100365470 // LOC691878	mCG140413-like // Ig heavy chain V-I region V35-like	1.49	0.0334
	17821513	NM_001030020	Prkar2b	protein kinase, cAMP dependent regulatory, type II beta	1.49	0.00487
	17626938	NM_001099458	Vom2r4	vomeronasal 2 receptor, 4	1.49	0.0244
	17874069	NM_030990	Plp1	proteolipid protein 1	1.48	0.00543
	17801737	NM_053699	Cited4	Cbp/p300-interacting transactivator, with Glu/Asp-rich carboxy-terminal domain, 4	1.48	0.00328
	17876157	ENSRNOT00000038068	Slc38a5	solute carrier family 38, member 5	1.48	0.0429
	17648197	ENSRNOT00000024068	P2rx1	purinergic receptor P2X, ligand-gated ion channel, 1	1.48	0.00564
	17772657	NM_012789	Dpp4	dipeptidylpeptidase 4	1.48	0.0093
	17640717	ENSRNOT00000032937	Ms4a6a	membrane-spanning 4-domains, subfamily A, member 6A	1.47	0.0427
	17749334	NM_080892	Selenbp1	selenium binding protein 1	1.47	0.0455
	17801865	---	---	---	1.47	0.00118
	17880823	---	---	---	1.47	0.000318
	17791600	NM_001107862	Nt5c3	5'-nucleotidase, cytosolic III	1.47	0.00916
	17674934	---	---	---	1.47	0.00371
	17674938	---	---	---	1.47	0.00371
	17674936	---	---	---	1.47	0.00371
	17647373	NM_001034125	Per1	period homolog 1 (Drosophila)	1.47	0.0199
	17757989	NM_013189	Gnaz	guanine nucleotide binding protein (G protein), alpha z polypeptide	1.46	0.00878
	17665753	---	---	---	1.46	0.026
	17792071	---	---	---	1.46	0.0135
	17848892	---	---	---	1.46	0.0068
	17784330	---	---	---	1.46	0.0251
	17787306	ENSRNOT00000026643	Vwf	von Willebrand factor	1.46	0.0047
	17611073	---	---	---	1.46	0.0106
	17870102	NM_053459 // NM_053459 // NM_053459	Rab27b // Rab27b // Rab27b	RAB27B, member RAS oncogene family // RAB27B, member RAS oncogene family // RAB27B, member RAS oncogene family	1.46	0.0138
	17674965	---	---	---	1.45	0.000159
	17792037	---	---	---	1.45	0.00905
	17633537	---	---	---	1.45	0.0176
	17872106	NM_001108254	Egfl6	EGF-like-domain, multiple 6	1.45	0.00631
	17825181	---	---	---	1.45	0.00331
	17793995	---	---	---	1.45	0.00331
	17659491	NM_001014119	Dhrs11	dehydrogenase/reductase (SDR family) member 11	1.45	0.0243
	17791924	---	---	---	1.45	0.00503
	17618542	NM_001170434	Lrrc32	leucine rich repeat containing 32	1.45	0.000292
	17737660	NR_001567	Terc	telomerase RNA component	1.45	0.0331
	17864415	NM_001108795	Tmeff2	transmembrane protein with EGF-like and two follistatin-like domains 2	1.45	0.0395
	17787979	NM_017337	Pde3a	phosphodiesterase 3A, cGMP inhibited	1.44	0.00846
	17869549	ENSRNOT00000041850 // ENSRNOT00000041850 // ENSRNOT00000041850 // ENSRNOT00000041850 // ENSRNOT00000041850 // ENSRNOT00000041850 // ENSRNOT00000041850 // ENSRNOT00000041850 // ENSRNOT00000041850 // ENSRNOT00000041850 // ENSRNOT00000041850 // ENSRNOT00000041850 // ENSRNOT00000041850 // ENSRNOT00000041850 // ENSRNOT00000041850 // ENSRNOT00000041850 // ENSRNOT00000041850 // ENSRNOT00000041850 // ENS…	LOC100364306 // LOC691410 // LOC691403 // LOC690867 // LOC690626 // LOC690523 // LOC690439 // LOC690281 // LOC690122 // LOC690010 // LOC689948 // LOC689905 // LOC689837 // LOC689667 // LOC689658 // LOC688732 // LOC688587 // LOC688428 // LOC687062 // LOC686719 // LOC686131 // LOC686017 // LOC685989 // LOC685966 // LOC685853 // LOC680748 // LOC680198 // LOC501349 // LOC501299 // LOC100364306 // LOC…	hypothetical protein LOC100364306 // similar to Discs large homolog 5 (Placenta and prostate DLG) (Discs large protein P-dlg) // hypothetical protein LOC691403 // similar to Discs large homolog 5 (Placenta and prostate DLG) (Discs large protein P-dlg) // hypothetical protein LOC690626 // hypothetical protein LOC690523 // similar to spermatogenesis associated glutamate (E)-rich protein 4d // simil…	1.44	0.0431
	17864410	NM_001007712	Sdpr	serum deprivation response	1.44	0.00485
	17613634	---	---	---	1.44	0.000401
	17688845	NM_001025671	Rassf6	Ras association (RalGDS/AF-6) domain family member 6	1.44	0.00709
	17868814	ENSRNOT00000041850 // ENSRNOT00000041850 // ENSRNOT00000041850 // ENSRNOT00000041850 // ENSRNOT00000041850 // ENSRNOT00000041850 // ENSRNOT00000041850 // ENSRNOT00000041850 // ENSRNOT00000041850 // ENSRNOT00000041850 // ENSRNOT00000041850 // ENSRNOT00000041850 // ENSRNOT00000041850 // ENSRNOT00000041850 // ENSRNOT00000041850 // ENSRNOT00000041850 // ENSRNOT00000041850 // ENSRNOT00000041850 // ENS…	LOC100364306 // LOC691410 // LOC691403 // LOC690867 // LOC690626 // LOC690523 // LOC690439 // LOC690281 // LOC690122 // LOC690010 // LOC689948 // LOC689905 // LOC689837 // LOC689667 // LOC689658 // LOC688732 // LOC688587 // LOC688428 // LOC687062 // LOC686719 // LOC686131 // LOC686017 // LOC685989 // LOC685966 // LOC685853 // LOC680748 // LOC680198 // LOC501349 // LOC501299	hypothetical protein LOC100364306 // similar to Discs large homolog 5 (Placenta and prostate DLG) (Discs large protein P-dlg) // hypothetical protein LOC691403 // similar to Discs large homolog 5 (Placenta and prostate DLG) (Discs large protein P-dlg) // hypothetical protein LOC690626 // hypothetical protein LOC690523 // similar to spermatogenesis associated glutamate (E)-rich protein 4d // simil…	1.44	0.0315
	17743909	---	---	---	1.44	0.00879
	17738973	NM_017303	Kcnab1	potassium voltage-gated channel, shaker-related subfamily, beta member 1	1.43	0.0075
	17751221	---	---	---	1.43	0.0112
	17740238	NM_001191900	Nup210l	nucleoporin 210-like	1.43	0.0197
	17696124	---	---	---	1.42	0.0189
	17653448	ENSRNOT00000054915	Fn3k	fructosamine 3 kinase	1.42	0.0463
	17868022	---	---	---	1.42	0.00482
	17791793	---	---	---	1.42	0.0067
	17705657	NM_172243	Ppif	peptidylprolyl isomerase F	1.42	2.64e-05
	17739202	---	---	---	1.42	0.0137
	17852156	NM_001013181	Zbtb16	zinc finger and BTB domain containing 16	1.42	0.0442
	17872929	---	---	---	1.42	0.0171
	17655114	XM_347266	Hbq1	hemoglobin, theta 1	1.41	0.0282
	17706917	NM_001100908	Fam129c	family with sequence similarity 129, member C	1.41	0.0135
	17650984	---	---	---	1.41	0.00267
	17668830	ENSRNOT00000032576	Gcet2	germinal center expressed transcript 2	1.41	0.00135
	17659156	NM_013034	Slc6a4	solute carrier family 6 (neurotransmitter transporter, serotonin), member 4	1.41	0.00768
	17693479	NM_001007729	Pf4	platelet factor 4	1.41	0.00393
	17769015	---	---	---	1.41	0.00524
	17637115	NM_001013237	Cd19	CD19 molecule	1.41	0.00354
	17815971	NM_001009694	LOC314140	ribose-phosphate pyrophosphokinase I -like	1.4	0.000843
	17854295	NM_022225	Htr1b	5-hydroxytryptamine (serotonin) receptor 1B	1.4	0.00206
	17623498	NM_001082977	Rasgrp2	RAS guanyl releasing protein 2 (calcium and DAG-regulated)	1.4	0.00236
	17809654	---	---	---	1.4	0.0225
	17791947	ENSRNOT00000064236 // ENSRNOT00000064236	LOC100363832 // LOC690532	rCG64263-like // Ig kappa chain V-IV region S107B-like	1.4	0.0351
	17839428	ENSRNOT00000056037	Tnfrsf13c	tumor necrosis factor receptor superfamily, member 13c	1.4	0.00129
	17778756	NM_001172118	Sla2	Src-like-adaptor 2	1.4	0.00467
	17672527	---	---	---	1.4	0.0175
	17745035	---	---	---	1.4	0.00915
	17643794	NM_001024864	Rogdi	rogdi homolog (Drosophila)	1.39	0.00537
	17761968	ENSRNOT00000043533	Kynu	kynureninase	1.39	0.0215
	17674969	---	---	---	1.39	0.0081
	17660791	NM_001107047	Ikzf3	IKAROS family zinc finger 3	1.39	0.00387
	17792063	---	---	---	1.39	0.00223
	17719505	---	---	---	1.39	0.0176
	17666537	ENSRNOT00000002640	Cldn1	claudin 1	1.39	0.0288
	17637216	NM_031834	Sult1a1	sulfotransferase family, cytosolic, 1A, phenol-preferring, member 1	1.39	0.0308
	17668868	ENSRNOT00000050092	Btla	B and T lymphocyte associated	1.39	0.000458
	17835696	---	---	---	1.39	0.0452
	17632419	ENSRNOT00000026599	Spib	Spi-B transcription factor (Spi-1/PU,1 related)	1.38	0.0165
	17622887	NM_001024289	Ptprcap	protein tyrosine phosphatase, receptor type, C-associated protein	1.38	0.00254
	17686833	NM_001000533	Olr1581	olfactory receptor 1581	1.38	0.0216
	17841209	NM_001012223	Bin2	bridging integrator 2	1.38	0.00238
	17673587	ENSRNOT00000032739	Ccdc92	coiled-coil domain containing 92	1.38	0.00179
	17699046	NM_001135010	Mcpt8l2	mast cell protease 8-like 2	1.38	0.0132
	17871134	ENSRNOT00000029272	Gata1	GATA binding protein 1	1.38	0.0433
	17701826	---	---	---	1.38	0.00918
	17727203	ENSRNOT00000022598	Slc14a1	solute carrier family 14 (urea transporter), member 1	1.38	0.0374
	17878689	---	---	---	1.38	0.0329
	17852428	ENSRNOT00000065744	RGD1563866	RGD1563866	1.38	0.0148
	17852874	NM_001025754	Neil1	nei endonuclease VIII-like 1 (E, coli)	1.38	0.00491
	17752825	NM_001003691	Ly6g6f	lymphocyte antigen 6 complex, locus G6F	1.38	0.0232
	17701199	---	---	---	1.38	0.0365
	17761781	NM_001000969	Olr410	olfactory receptor 410	1.38	0.046
	17696018	NM_001011912	Polm	polymerase (DNA directed), mu	1.37	0.00132
	17828596	ENSRNOT00000052288 // ENSRNOT00000052288	Slc26a10 // Slc26a10	solute carrier family 26, member 10 // solute carrier family 26, member 10	1.37	0.00631
	17748225	NM_012769	Gucy1b3	guanylate cyclase 1, soluble, beta 3	1.37	0.00572
	17722258	---	---	---	1.37	0.0436
	17737540	NM_001106422	Tnik	TRAF2 and NCK interacting kinase	1.37	0.00784
	17870134	NM_001107331	Irx1	iroquois homeobox 1	1.37	0.000255
	17784296	---	---	---	1.37	0.00434
	17851315	NM_001000464	Olr1304	olfactory receptor 1304	1.37	0.0493
	17614316	ENSRNOT00000027254	Cd79a	Cd79a molecule, immunoglobulin-associated alpha	1.37	0.00255
	17825047	---	---	---	1.37	0.0151
	17679961	ENSRNOT00000009241	Ctse	cathepsin E	1.37	0.00474
	17807070	ENSRNOT00000012602	RGD1305420	similar to Nef associated protein 1	1.37	0.0219
	17742434	ENSRNOT00000019638	Pde5a	phosphodiesterase 5A, cGMP-specific	1.37	0.00919
	17633427	---	---	---	1.37	0.00433
	17648173	ENSRNOT00000064840	Atp2a3	ATPase, Ca++ transporting, ubiquitous	1.36	0.00524
	17678148	---	---	---	1.36	0.00215
	17709973	NM_001012211	Phf7	PHD finger protein 7	1.36	0.0169
	17739545	NM_001025685	Cd5l	Cd5 molecule-like	1.36	0.0296
	17686521	ENSRNOT00000004183	Fcrla	Fc receptor-like A	1.36	0.00613
	17806786	NM_001024344	Sit1	signaling threshold regulating transmembrane adaptor 1	1.36	0.00382
	17856536	NM_001108786	Csrnp1	cysteine-serine-rich nuclear protein 1	1.36	0.00277
	17631725	ENSRNOT00000028532	Ffar2	free fatty acid receptor 2	1.36	0.0211
	17659799	---	---	---	1.36	0.00632
	17777439	BC098814	RGD1311739	similar to RIKEN cDNA 1700037H04	1.36	0.0193
	17815261	NM_001108705	Sh3yl1	SH3 domain containing, Ysc84-like 1 (S, cerevisiae)	1.36	0.045
	17611483	NM_057103	Akap12	A kinase (PRKA) anchor protein 12	1.36	0.00324
	17786640	NM_001191977	Cecr2	cat eye syndrome chromosome region, candidate 2 homolog (human)	1.36	0.0145
	17683002	NM_001105985	Slc30a10	solute carrier family 30, member 10	1.36	0.0464
	17784173	---	---	---	1.35	0.0193
	17684692	---	---	---	1.35	0.0258
	17633389	---	---	---	1.35	0.0138
	17683390	ENSRNOT00000041190	RGD1561440	similar to nemo like kinase	1.35	0.00149
	17801430	---	---	---	1.35	0.0427
	17856732	NM_133296	Slc6a20	solute carrier family 6 (proline IMINO transporter), member 20	1.35	0.0474
	17877485	NM_001014272	Ptges3l1	prostaglandin E synthase 3-like 1	1.35	0.00683
	17617468	XM_001059420	Fam169b	family with sequence similarity 169, member B	1.35	0.0169
	17774890	ENSRNOT00000006115	Rag1	recombination activating gene 1	1.35	0.0103
	17783415	NM_001024328	Gimap7	GTPase, IMAP family member 7	1.35	0.000556
	17848896	---	---	---	1.35	0.021
	17698957	NM_021656	Ltb4r	leukotriene B4 receptor	1.35	0.00476
	17783836	---	---	---	1.35	0.0451
	17868068	ENSRNOT00000041850 // ENSRNOT00000041850 // ENSRNOT00000041850 // ENSRNOT00000041850 // ENSRNOT00000041850 // ENSRNOT00000041850 // ENSRNOT00000041850 // ENSRNOT00000041850 // ENSRNOT00000041850 // ENSRNOT00000041850 // ENSRNOT00000041850 // ENSRNOT00000041850 // ENSRNOT00000041850 // ENSRNOT00000041850 // ENSRNOT00000041850 // ENSRNOT00000041850 // ENSRNOT00000041850 // ENSRNOT00000041850 // ENS…	LOC100364306 // LOC691410 // LOC691403 // LOC690867 // LOC690626 // LOC690523 // LOC690439 // LOC690281 // LOC690122 // LOC690010 // LOC689948 // LOC689905 // LOC689837 // LOC689667 // LOC689658 // LOC688732 // LOC688587 // LOC688428 // LOC687062 // LOC686719 // LOC686131 // LOC686017 // LOC685989 // LOC685966 // LOC685853 // LOC680748 // LOC680198 // LOC501349 // LOC501299 // LOC100364306 // LOC…	hypothetical protein LOC100364306 // similar to Discs large homolog 5 (Placenta and prostate DLG) (Discs large protein P-dlg) // hypothetical protein LOC691403 // similar to Discs large homolog 5 (Placenta and prostate DLG) (Discs large protein P-dlg) // hypothetical protein LOC690626 // hypothetical protein LOC690523 // similar to spermatogenesis associated glutamate (E)-rich protein 4d // simil…	1.35	0.0298
	17694416	NM_001013430	Rhoh	ras homolog gene family, member H	1.35	0.00537
	17643844	ENSRNOT00000004999	RGD1310686	similar to chromosome 16 open reading frame 5	1.35	0.00024
	17797699	NM_001135754	RGD1562865	similar to BTB and CNC homology 1, basic leucine zipper transcription factor 2	1.35	0.0235
	17718539	---	---	---	1.35	0.00633
	17693978	ENSRNOT00000002908	RGD1311575	hypothetical LOC289568	1.35	0.0287
	17629011	NM_001008962	Vom1r12	vomeronasal 1 receptor 12	1.34	0.0137
	17728510	---	---	---	1.34	0.0146
	17687788	NM_001105989	Cr2	complement component (3d/Epstein Barr virus) receptor 2	1.34	0.00385
	17872199	---	---	---	1.34	0.0242
	17806987	NM_001109261 // NM_001109261 // NM_001109261	RGD1565236 // RGD1565236 // RGD1565236	similar to transcription factor // similar to transcription factor // similar to transcription factor	1.34	0.00408
	17843916	NM_001134635 // NM_001134635 // NM_001134635	RGD1566243 // RGD1566243 // RGD1566243	similar to protein of unknown function // similar to protein of unknown function // similar to protein of unknown function	1.34	0.00523
	17788829	NM_053455	Fgl2	fibrinogen-like 2	1.34	0.0172
	17766510	XM_001061110	LOC681292	hypothetical protein LOC681292	1.34	0.000602
	17791155	---	---	---	1.34	0.0434
	17690991	ENSRNOT00000057738	Pik3ip1	phosphoinositide-3-kinase interacting protein 1	1.34	0.00339
	17644874	NM_053769	Dusp1	dual specificity phosphatase 1	1.34	0.00599
	17833964	NM_001106767	Elane	elastase, neutrophil expressed	1.34	0.0187
	17767549	---	---	---	1.34	0.00516
	17610855	---	---	---	1.34	0.0095
	17688412	NM_022605 // NM_022605 // NM_022605	Hpse // Hpse // Hpse	heparanase // heparanase // heparanase	1.34	0.0108
	17741790	ENSRNOT00000050149	Kcna2	potassium voltage-gated channel, shaker-related subfamily, member 2	1.34	0.00605
	17851805	ENSRNOT00000049125	Foxr1	forkhead box R1	1.34	0.00237
	17681823	---	---	---	1.34	0.0138
	17611983	NM_001077677	Pacrg	Park2 co-regulated	1.34	0.00561
	17843304	NM_001000810	Olr1244	olfactory receptor 1244	1.34	0.0425
	17850816	NM_017297 // NM_017297 // NM_017297	Kcnj5 // Kcnj5 // Kcnj5	potassium inwardly-rectifying channel, subfamily J, member 5 // potassium inwardly-rectifying channel, subfamily J, member 5 // potassium inwardly-rectifying channel, subfamily J, member 5	1.34	0.0185
	17835758	NM_001108991	Trhde	thyrotropin-releasing hormone degrading enzyme	1.34	0.00407
	17824990	---	---	---	1.33	0.0105
	17611535	NM_001106207	Myct1	myc target 1	1.33	0.0104
	17645118	NM_001037773	Ccnjl	cyclin J-like	1.33	0.012
	17662441	ENSRNOT00000015976	Cd79b	Cd79b molecule, immunoglobulin-associated beta	1.33	0.0059
	17740973	ENSRNOT00000028770	Hist2h2be	histone cluster 2, H2be	1.33	0.00923
	17738812	ENSRNOT00000019305	P2ry1	purinergic receptor P2Y, G-protein coupled, 1	1.33	0.000191
	17776388	NM_001011957	Ell3	elongation factor RNA polymerase II-like 3	1.33	0.0203
	17857480	---	---	---	1.33	0.0298
	17684931	NM_001047084	Rgs18	regulator of G-protein signaling 18	1.33	0.00325
	17765931	NM_001012089	Dusp2	dual specificity phosphatase 2	1.33	0.00579
	17757642	---	---	---	1.33	0.0426
	17645265	ENSRNOT00000009573	Havcr1	hepatitis A virus cellular receptor 1	1.33	0.000556
	17682903	NM_001105734	Dusp10	dual specificity phosphatase 10	1.33	0.0078
	17639905	ENSRNOT00000035921	LOC100362395	hypothetical protein LOC100362395	1.33	0.0384
	17640736	---	---	---	1.33	0.0232
	17826572	ENSRNOT00000038553	Prss57	protease, serine, 57	1.33	0.0478
	17691515	NM_001135915	LOC688553	hypothetical protein LOC688553	1.33	0.0412
	17667285	NM_001190341	LOC100360919	Immunoglobulin lambda-like polypeptide 1-like	1.33	0.0237
	17715101	ENSRNOT00000020672	Mak	male germ cell-associated kinase	1.33	0.0217
	17873757	---	---	---	1.33	0.0124
	17872715	NM_001109318	RGD1565785	similar to chromosome X open reading frame 21	1.33	0.00762
	17803755	---	---	---	1.33	0.0373
	17859327	XM_001068385	Sgol2	shugoshin-like 2 (S, pombe)	1.33	0.0215
	17690328	---	---	---	1.33	0.00373
	17626824	ENSRNOT00000011983	Slc18a2	solute carrier family 18 (vesicular monoamine), member 2	1.32	0.00432
	17816804	NM_021863	Hspa2	heat shock protein 2	1.32	0.00284
	17627510	NM_001107522	Slc35d3	solute carrier family 35, member D3	1.32	0.0143
	17684462	---	---	---	1.32	0.00246
	17652539	ENSRNOT00000038103 // ENSRNOT00000038103	LOC100364984 // LOC100360253	rCG35079-like // rCG35079-like	1.32	0.0403
	17761738	ENSRNOT00000010218	Ptgs1	prostaglandin-endoperoxide synthase 1	1.32	0.00119
	17792043	ENSRNOT00000063862	LOC690794	Ig kappa chain V-IV region-like	1.32	0.00923
	17613125	NM_001109604	Tmem86b	transmembrane protein 86B	1.32	0.0459
	17861310	---	---	---	1.32	0.00751
	17719541	XM_003751709	LOC100910200	histone H2B type 1-C/E/G-like	1.32	0.0341
	17655564	NM_183326	Gabra1	gamma-aminobutyric acid (GABA) A receptor, alpha 1	1.32	0.00657
	17755755	NM_012752	Cd24	CD24 molecule	1.32	0.0266
	17685654	ENSRNOT00000006511	Ralgps2	Ral GEF with PH domain and SH3 binding motif 2	1.32	0.00443
	17750235	BC097395 // BC097395	Adora3 // Adora3	adenosine A3 receptor // adenosine A3 receptor	1.32	0.00302
	17755203	NM_001076553	Pkib	protein kinase (cAMP-dependent, catalytic) inhibitor beta	1.32	0.015
	17774142	NM_001000931	Olr499	olfactory receptor 499	1.32	0.0225
	17735432	---	---	---	1.32	0.019
	17729720	NM_031334	Cdh1	cadherin 1	1.32	0.0271
	17840603	ENSRNOT00000016044	Col2a1	collagen, type II, alpha 1	1.32	0.00735
	17879047	ENSRNOT00000048080	Tsc22d3	TSC22 domain family, member 3	1.32	0.022
	17665972	NM_172047	Eaf2	ELL associated factor 2	1.32	0.00543
	17704504	NM_133413	Cysltr2	cysteinyl leukotriene receptor 2	1.32	0.00976
	17718441	NM_001126083	Cks2	CDC28 protein kinase regulatory subunit 2	1.32	0.0118
	17753194	NM_212529	Hsd17b8	hydroxysteroid (17-beta) dehydrogenase 8	1.32	0.000368
	17696396	---	---	---	1.32	0.0389
	17778148	NM_001106524	Acss1	acyl-CoA synthetase short-chain family member 1	1.32	0.00802
	17859862	---	---	---	1.32	0.0374
	17823051	---	---	---	1.32	0.00155
	17830673	NM_001199315	Gtpbp1	GTP binding protein 1	1.32	0.00462
	17742599	NM_001014044	Tifa	TRAF-interacting protein with forkhead-associated domain	1.32	0.00478
	17647603	ENSRNOT00000056836	Ybx2	Y box binding protein 2	1.32	0.0457
	17655736	NM_001013855	Timd2	T-cell immunoglobulin and mucin domain containing 2	1.31	0.00574
	17755968	NM_001000896	Olr1726	olfactory receptor 1726	1.31	0.0225
	17696408	NM_001025750	Plek	pleckstrin	1.31	0.0105
	17856556	---	---	---	1.31	0.00387
	17660692	NM_001109046	Arl5c	ADP-ribosylation factor-like 5C	1.31	0.0178
	17792008	---	---	---	1.31	0.0166
	17655588	ENSRNOT00000005070	Pttg1	pituitary tumor-transforming 1	1.31	0.00878
	17718660	NM_001107343	Kdm1b	lysine (K)-specific demethylase 1B	1.31	0.027
	17740977	XM_002726027	LOC690131	similar to H2A histone family, member O	1.31	0.00665
	17640742	XM_001078193	LOC690930	similar to membrane-spanning 4-domains, subfamily A, member 6B	1.31	0.000911
	17626494	ENSRNOT00000020155	Pdcd4	programmed cell death 4	1.31	0.000173
	17738489	NM_080396	Trpc4	transient receptor potential cation channel, subfamily C, member 4	1.31	0.0183
	17647720	---	---	---	1.31	0.0364
	17748501	---	---	---	1.31	0.0171
	17738703	ENSRNOT00000057840	Med12l	mediator complex subunit 12-like	1.31	0.00241
	17843590	NM_001109291	H2afx	H2A histone family, member X	1.31	0.0216
	17687992	NM_012566	Gfi1	growth factor independent 1 transcription repressor	1.3	0.0101
	17702055	NM_001007015	Rnase2	ribonuclease, RNase A family, 2 (liver, eosinophil-derived neurotoxin)	1.3	0.0402
	17874448	---	---	---	1.3	0.00409
	17708130	NM_001107312	Mtmr7	myotubularin related protein 7	1.3	0.036
	17642786	ENSRNOT00000017296	Itprip	inositol 1,4,5-trisphosphate receptor interacting protein	1.3	0.00588
	17643172	ENSRNOT00000013170	Prlhr	prolactin releasing hormone receptor	1.3	0.0404
	17824719	---	---	---	1.3	0.0416
	17792102	NM_001108632	Rpia	ribose 5-phosphate isomerase A	1.3	0.0229
	17809960	NM_171993	Cdc20	cell division cycle 20 homolog (S, cerevisiae)	1.3	0.02
	17762996	NM_001025693	Cdca7	cell division cycle associated 7	1.3	0.00907
	17718710	ENSRNOT00000023613	Gmpr	guanosine monophosphate reductase	1.3	0.00891
	17862580	XM_001059150	Treml2	triggering receptor expressed on myeloid cells-like 2	1.3	0.00405
	17784319	---	---	---	1.3	0.0267
	17613742	NM_001077644	Ptgir	prostaglandin I2 (prostacyclin) receptor (IP)	1.3	0.00895
	17727794	---	---	---	1.3	0.00449
	17643674	ENSRNOT00000003514	Carhsp1	calcium regulated heat stable protein 1	1.3	0.00737
	17707900	---	---	---	1.3	0.0129
	17841708	ENSRNOT00000055268	Spt1	salivary protein 1	1.3	0.0212
	17778262	ENSRNOT00000029620	Psmf1	proteasome inhibitor subunit 1	1.3	0.0139
	17719537	NM_001106114	Hist1h2bn	histone cluster 1, H2bn	1.3	0.0428
	17622506	BC158837	Phemx	pan hematopoietic expression	1.3	0.0104
	17791704	---	---	---	1.29	0.012
	17851973	---	---	---	1.29	0.00373
	17666656	ENSRNOT00000002452	Dgkg	diacylglycerol kinase, gamma	1.29	0.044
	17827532	---	---	---	1.29	0.013
	17869433	ENSRNOT00000041850 // ENSRNOT00000041850 // ENSRNOT00000041850 // ENSRNOT00000041850 // ENSRNOT00000041850 // ENSRNOT00000041850 // ENSRNOT00000041850 // ENSRNOT00000041850 // ENSRNOT00000041850 // ENSRNOT00000041850 // ENSRNOT00000041850 // ENSRNOT00000041850 // ENSRNOT00000041850 // ENSRNOT00000041850 // ENSRNOT00000041850 // ENSRNOT00000041850 // ENSRNOT00000041850 // ENSRNOT00000041850 // ENS…	LOC100364306 // LOC691410 // LOC691403 // LOC690867 // LOC690626 // LOC690523 // LOC690439 // LOC690281 // LOC690122 // LOC690010 // LOC689948 // LOC689905 // LOC689837 // LOC689667 // LOC689658 // LOC688732 // LOC688587 // LOC688428 // LOC687062 // LOC686719 // LOC686131 // LOC686017 // LOC685989 // LOC685966 // LOC685853 // LOC680748 // LOC680198 // LOC501349 // LOC501299 // LOC100364306 // LOC…	hypothetical protein LOC100364306 // similar to Discs large homolog 5 (Placenta and prostate DLG) (Discs large protein P-dlg) // hypothetical protein LOC691403 // similar to Discs large homolog 5 (Placenta and prostate DLG) (Discs large protein P-dlg) // hypothetical protein LOC690626 // hypothetical protein LOC690523 // similar to spermatogenesis associated glutamate (E)-rich protein 4d // simil…	1.29	0.00976
	17765014	NM_001109204	Rad51	RAD51 homolog (S, cerevisiae)	1.29	0.0315
	17663202	FQ227491 // FQ227491 // FQ227491	LOC100360582 // LOC100360582 // LOC100360582	5',3'-nucleotidase, cytosolic // 5',3'-nucleotidase, cytosolic // 5',3'-nucleotidase, cytosolic	1.29	0.000324
	17611731	ENSRNOT00000024967	Sytl3	synaptotagmin-like 3	1.29	0.00718
	17753697	NM_001107617	Fgd2	FYVE, RhoGEF and PH domain containing 2	1.29	0.000361
	17811905	ENSRNOT00000009230	Padi3	peptidyl arginine deiminase, type III	1.29	0.00327
	17786036	---	---	---	1.29	0.0249
	17739553	FQ232638	Fcrl1	Fc receptor-like 1	1.29	0.00428
	17778973	---	---	---	1.29	0.0164
	17818703	NR_031896	Mir154	microRNA mir-154	1.29	0.038
	17768451	NM_001191072	Ppp1r16b	protein phosphatase 1, regulatory subunit 16B	1.29	0.0092
	17662664	NM_001105713	Prkca	protein kinase C, alpha	1.29	0.00775
	17819677	NM_001100671	Atl2	atlastin GTPase 2	1.29	0.00833
	17825144	---	---	---	1.29	0.0363
	17683592	---	---	---	1.29	0.0108
	17771793	NM_053416	Strbp	spermatid perinuclear RNA binding protein	1.29	0.0063
	17719453	NM_001024273 // NM_001024273 // NM_001024273	Cmah // Cmah // Cmah	cytidine monophosphate-N-acetylneuraminic acid hydroxylase // cytidine monophosphate-N-acetylneuraminic acid hydroxylase // cytidine monophosphate-N-acetylneuraminic acid hydroxylase	1.29	0.00349
	17837062	---	---	---	1.29	0.0489
	17853874	NM_001014211	Myzap	myocardial zonula adherens protein	1.29	0.0215
	17715718	NM_001107352	Hist1h2bh	histone cluster 1, H2bh	1.29	0.0157
	17781495	---	---	---	1.29	0.00772
	17731537	NM_152242	Gpr56	G protein-coupled receptor 56	1.29	0.00509
	17664107	NM_001107074	Cd7	Cd7 molecule	1.29	0.0248
	17635934	NM_001000204	Olr229	olfactory receptor 229	1.29	0.0208
	17851697	NM_001106816	Abcg4	ATP-binding cassette, subfamily G (WHITE), member 4	1.29	0.0442
	17749618	NM_001123469	Hist2h4	histone cluster 2, H4	1.29	0.00389
	17792094	---	---	---	1.29	0.0333
	17765687	NM_001107769	Slc24a5	solute carrier family 24, member 5	1.28	0.0451
	17775817	BC167069	Oip5	Opa interacting protein 5	1.28	0.0404
	17636799	NM_001025682	Cdr2	cerebellar degeneration-related 2	1.28	0.0477
	17878790	ENSRNOT00000043770	Btk	Bruton agammaglobulinemia tyrosine kinase	1.28	0.00202
	17818030	ENSRNOT00000011775	Unc79	unc-79 homolog (C, elegans)	1.28	0.0133
	17795803	ENSRNOT00000038581	Tas2r140	taste receptor, type 2, member 140	1.28	0.0296
	17770413	NM_031348	Fcn1	ficolin (collagen/fibrinogen domain containing) 1	1.28	0.0373
	17822564	XM_002726707	LOC100364391	dehydrogenase/reductase (SDR family) member 7-like	1.28	0.0356
	17638525	---	---	---	1.28	0.0375
	17880605	NM_053394 // NM_053394 // NM_053394	Klf5 // Klf5 // Klf5	Kruppel-like factor 5 // Kruppel-like factor 5 // Kruppel-like factor 5	1.28	0.0237
	17784209	ENSRNOT00000042300 // ENSRNOT00000042300	LOC100362150 // LOC500161	rCG64255-like // Ig kappa chain V-V region MOPC 173B-like	1.28	0.0363
	17841623	NM_001012224 // NM_001012224 // NM_001012224	Nfe2 // Nfe2 // Nfe2	nuclear factor, erythroid derived 2 // nuclear factor, erythroid derived 2 // nuclear factor, erythroid derived 2	1.28	0.0141
	17612139	---	---	---	1.28	0.0212
	17791927	---	---	---	1.28	0.0431
	17700455	NM_053394	Klf5	Kruppel-like factor 5	1.28	0.0211
	17806771	---	---	---	1.28	0.0371
	17626963	---	---	---	1.28	0.00913
	17709469	NM_001106095	Lig4	ligase IV, DNA, ATP-dependent	1.28	0.00818
	17683791	NM_001110763	Tmem163	transmembrane protein 163	1.28	0.00124
	17664925	---	---	---	1.28	0.0403
	17651087	ENSRNOT00000023872	Cnp	2',3'-cyclic nucleotide 3' phosphodiesterase	1.28	0.00183
	17831937	XM_001058576	Tmem117	transmembrane protein 117	1.28	0.0317
	17770547	NM_001134617	RGD1565512	similar to hypothetical protein 4932418E24	1.28	0.0283
	17875128	NM_184045	Srpk3	SRSF protein kinase 3	1.28	0.00169
	17843087	ENSRNOT00000007903	LOC680367	similar to Urinary protein 3 precursor (RUP-3)	1.28	0.0183
	17870189	ENSRNOT00000041850 // ENSRNOT00000041850 // ENSRNOT00000041850 // ENSRNOT00000041850 // ENSRNOT00000041850 // ENSRNOT00000041850 // ENSRNOT00000041850 // ENSRNOT00000041850 // ENSRNOT00000041850 // ENSRNOT00000041850 // ENSRNOT00000041850 // ENSRNOT00000041850 // ENSRNOT00000041850 // ENSRNOT00000041850 // ENSRNOT00000041850 // ENSRNOT00000041850 // ENSRNOT00000041850 // ENSRNOT00000041850 // ENS…	LOC100364306 // LOC691410 // LOC691403 // LOC690867 // LOC690626 // LOC690523 // LOC690439 // LOC690281 // LOC690122 // LOC690010 // LOC689948 // LOC689905 // LOC689837 // LOC689667 // LOC689658 // LOC688732 // LOC688587 // LOC688428 // LOC687062 // LOC686719 // LOC686131 // LOC686017 // LOC685989 // LOC685966 // LOC685853 // LOC680748 // LOC680198 // LOC501349 // LOC501299 // LOC100364306 // LOC…	hypothetical protein LOC100364306 // similar to Discs large homolog 5 (Placenta and prostate DLG) (Discs large protein P-dlg) // hypothetical protein LOC691403 // similar to Discs large homolog 5 (Placenta and prostate DLG) (Discs large protein P-dlg) // hypothetical protein LOC690626 // hypothetical protein LOC690523 // similar to spermatogenesis associated glutamate (E)-rich protein 4d // simil…	1.28	0.041
	17872884	NR_031936	Mir223	microRNA mir-223	1.28	0.0152
	17757188	NM_001012174	Fkbp5	FK506 binding protein 5	1.28	0.0163
	17731522	ENSRNOT00000067862	Gpr97	G protein-coupled receptor 97	1.28	0.0351
	17869583	ENSRNOT00000041850 // ENSRNOT00000041850 // ENSRNOT00000041850 // ENSRNOT00000041850 // ENSRNOT00000041850 // ENSRNOT00000041850 // ENSRNOT00000041850 // ENSRNOT00000041850 // ENSRNOT00000041850 // ENSRNOT00000041850 // ENSRNOT00000041850 // ENSRNOT00000041850 // ENSRNOT00000041850 // ENSRNOT00000041850 // ENSRNOT00000041850 // ENSRNOT00000041850 // ENSRNOT00000041850 // ENSRNOT00000041850 // ENS…	LOC100364306 // LOC691410 // LOC691403 // LOC690867 // LOC690626 // LOC690523 // LOC690439 // LOC690281 // LOC690122 // LOC690010 // LOC689948 // LOC689905 // LOC689837 // LOC689667 // LOC689658 // LOC688732 // LOC688587 // LOC688428 // LOC687062 // LOC686719 // LOC686131 // LOC686017 // LOC685989 // LOC685966 // LOC685853 // LOC680748 // LOC680198 // LOC501349 // LOC501299	hypothetical protein LOC100364306 // similar to Discs large homolog 5 (Placenta and prostate DLG) (Discs large protein P-dlg) // hypothetical protein LOC691403 // similar to Discs large homolog 5 (Placenta and prostate DLG) (Discs large protein P-dlg) // hypothetical protein LOC690626 // hypothetical protein LOC690523 // similar to spermatogenesis associated glutamate (E)-rich protein 4d // simil…	1.28	0.0129
	17851649	---	---	---	1.28	0.0487
	17864040	NM_001191887	Aff3	AF4/FMR2 family, member 3	1.28	0.00751
	17758331	ENSRNOT00000048029	Cdh23	cadherin-related 23	1.28	0.0256
	17632781	NM_017124	Cd37	CD37 molecule	1.27	0.00266
	17673387	---	---	---	1.27	0.039
	17671163	ENSRNOT00000001416	Higd2al1	HIG1 hypoxia inducible domain family, member 2A-like 1	1.27	0.00443
	17681515	NM_001047878	F5	coagulation factor V (proaccelerin, labile factor)	1.27	0.0368
	17692738	---	---	---	1.27	0.00306
	17834517	NM_012886	Timp3	TIMP metallopeptidase inhibitor 3	1.27	0.00395
	17640074	NM_001106331 // NM_001106331	Trpt1 // Trpt1	tRNA phosphotransferase 1 // tRNA phosphotransferase 1	1.27	0.000197
	17751599	NM_001108568	Dapp1	dual adaptor of phosphotyrosine and 3-phosphoinositides	1.27	0.00352
	17641983	NM_017365	Pdlim1	PDZ and LIM domain 1	1.27	0.00159
	17824792	---	---	---	1.27	0.0453
	17616849	---	---	---	1.27	0.00248
	17635922	NM_001001372	Olr219	olfactory receptor 219	1.27	0.026
	17876957	NM_001007756	Gemin8	gem (nuclear organelle) associated protein 8	1.27	0.00033
	17798634	NM_131911 // NM_131911 // NM_131911	Anp32b // Anp32b // Anp32b	acidic (leucine-rich) nuclear phosphoprotein 32 family, member B // acidic (leucine-rich) nuclear phosphoprotein 32 family, member B // acidic (leucine-rich) nuclear phosphoprotein 32 family, member B	1.27	0.00137
	17801184	NM_024132	Faah	fatty acid amide hydrolase	1.27	0.0182
	17761320	NM_001108578	Aif1l	allograft inflammatory factor 1-like	1.27	0.00176
	17783774	NM_012850	Ghrhr	growth hormone releasing hormone receptor	1.27	0.0475
	17765104	NM_001107762	Nusap1	nucleolar and spindle associated protein 1	1.27	0.0095
	17618647	---	---	---	1.27	0.00523
	17640182	NM_001115042 // NM_001115042 // NM_001115042	Cdca5 // Cdca5 // Cdca5	cell division cycle associated 5 // cell division cycle associated 5 // cell division cycle associated 5	1.27	0.0242
	17728080	ENSRNOT00000019677	Mcm5	minichromosome maintenance complex component 5	1.27	0.0203
	17774132	NM_001000933	Olr490	olfactory receptor 490	1.27	0.00945
	17822267	NM_001169108	Pole2	polymerase (DNA directed), epsilon 2 (p59 subunit)	1.27	0.0458
	17751939	ENSRNOT00000021861	Dnase2b	deoxyribonuclease II beta	1.27	0.00443
	17865613	NM_199112	Cnppd1	cyclin Pas1/PHO80 domain containing 1	1.27	0.000794
	17722383	---	---	---	1.27	0.00893
	17751564	NM_001047918	Bank1	B-cell scaffold protein with ankyrin repeats 1	1.27	0.018
	17738789	---	---	---	1.27	0.00115
	17819509	NM_001034953	Cdca7l	cell division cycle associated 7 like	1.27	0.00644
	17873542	NM_001106938	Gpr174	G protein-coupled receptor 174	1.27	0.00792
	17833399	NM_017054	Tbxa2r	thromboxane A2 receptor	1.27	0.00331
	17878150	NM_001098674	Ercc6l	excision repair cross-complementing rodent repair deficiency complementation group 6 - like	1.27	0.0141
	17632935	NM_031635	Fut2	fucosyltransferase 2 (secretor status included)	1.27	0.0444
	17665134	NM_001001108	Olr1548	olfactory receptor 1548	1.27	0.0212
	17635082	NM_001106211	B3gnt6	UDP-GlcNAc:betaGal beta-1,3-N-acetylglucosaminyltransferase 6 (core 3 synthase)	1.27	0.00815
	17855313	---	---	---	1.27	0.00227
	17791413	---	---	---	1.27	0.0084
	17682702	---	---	---	1.27	0.028
	17774377	NM_001000573	Olr724	olfactory receptor 724	1.27	0.00337
	17701610	---	---	---	1.26	0.0235
	17620412	---	---	---	1.26	0.0351
	17732679	NM_001107160	Asf1b	ASF1 anti-silencing function 1 homolog B (S, cerevisiae)	1.26	0.0153
	17690348	NM_021751	Prom1	prominin 1	1.26	0.0487
	17829886	NM_001114405	Ptp4a3	protein tyrosine phosphatase type IVA, member 3	1.26	0.016
	17700564	BC088867	RGD1308626	similar to 9630044O09Rik protein	1.26	0.000715
	17818160	NM_001108722	Glrx5	glutaredoxin 5	1.26	0.0382
	17783420	ENSRNOT00000059157	Gimap1	GTPase, IMAP family member 1	1.26	0.0145
	17781031	---	---	---	1.26	0.0313
	17838872	---	---	---	1.26	0.023
	17800014	---	---	---	1.26	0.0256
	17846787	ENSRNOT00000068396	Tfdp2	transcription factor Dp-2 (E2F dimerization partner 2)	1.26	0.0183
	17756750	NM_001164826	RT1-Db2	RT1 class II, locus Db2	1.26	0.0408
	17629231	NM_080694	Cacng6	calcium channel, voltage-dependent, gamma subunit 6	1.26	0.0322
	17728713	NM_001013190	Rad23a	RAD23 homolog A (S, cerevisiae)	1.26	0.0355
	17856974	NM_001012129	Satb1	SATB homeobox 1	1.26	0.0135
	17625876	---	---	---	1.26	0.00931
	17880342	---	---	---	1.26	0.000992
	17830359	ENSRNOT00000040706	RGD1309808	similar to apolipoprotein L2; apolipoprotein L-II	1.26	0.00071
	17633553	---	---	---	1.26	0.00477
	17726933	ENSRNOT00000022364	Mc5r	melanocortin 5 receptor	1.26	0.0102
	17784332	ENSRNOT00000042722	RGD1563048	similar to ribosomal protein L21	1.26	0.00972
	17700339	NM_001012045	Kbtbd7	kelch repeat and BTB (POZ) domain containing 7	1.26	0.0287
	17652825	NM_001163002	LOC689926	hypothetical protein LOC689926	1.26	0.0269
	17619462	---	---	---	1.26	0.0317
	17739910	---	---	---	1.26	0.00852
	17813934	ENSRNOT00000021538	Msh2	mutS homolog 2 (E, coli)	1.26	0.011
	17801239	NM_001106679	Ipp	intracisternal A particle-promoted polypeptide	1.26	0.0425
	17761026	NM_001108577	Ppp2r4	protein phosphatase 2A activator, regulatory subunit 4	1.26	0.0188
	17768210	ENSRNOT00000027445	Myl9	myosin, light chain 9, regulatory	1.26	0.0202
	17793030	XM_001075299	H1fx	H1 histone family, member X	1.26	0.00793
	17869606	---	---	---	1.26	0.016
	17660224	NM_001105830	Eme1	essential meiotic endonuclease 1 homolog 1 (S, pombe)	1.26	0.0225
	17874454	NM_001191736	Mst4	serine/threonine protein kinase MST4	1.26	0.0105
	17697215	NM_001039516	Kcnk5	potassium channel, subfamily K, member 5	1.26	0.0335
	17649960	---	---	---	1.26	0.00555
	17649962	---	---	---	1.26	0.00555
	17649952	---	---	---	1.26	0.00555
	17710793	NM_001106069	Fcho1	FCH domain only 1	1.26	0.00529
	17696816	---	---	---	1.26	0.0197
	17703375	NM_001108379	Ska3	spindle and kinetochore associated complex subunit 3	1.26	0.00616
	17750608	BC166728	RGD1310209	similar to KIAA1324 protein	1.25	0.0283
	17833191	ENSRNOT00000044214	Olr932	olfactory receptor 932	1.25	0.0137
	17824943	ENSRNOT00000048073	LOC100365766	Igh protein-like	1.25	0.0196
	17876117	NM_001012227 // NM_001012227 // NM_001012227	Xk // Xk // Xk	X-linked Kx blood group (McLeod syndrome) // X-linked Kx blood group (McLeod syndrome) // X-linked Kx blood group (McLeod syndrome)	1.25	0.0492
	17763704	NM_001000927	Olr606	olfactory receptor 606	1.25	0.0163
	17869541	---	---	---	1.25	0.0472
	17746136	ENSRNOT00000059565	Ankrd33b	ankyrin repeat domain 33B	1.25	0.0155
	17764333	NM_012520	Cat	catalase	1.25	0.0143
	17656524	NM_001164264	Rnf187	ring finger protein 187	1.25	0.0172
	17630764	NM_001107495	Cyp2s1	cytochrome P450, family 2, subfamily s, polypeptide 1	1.25	0.00414
	17627542	---	---	---	1.25	0.0189
	17743150	NM_001108569	Gbp5	guanylate binding protein 5	1.25	0.00443
	17693604	ENSRNOT00000004440	Dck	deoxycytidine kinase	1.25	0.00944
	17681948	NM_053796	F11r	F11 receptor	1.25	0.00344
	17619171	NM_001000548	Olr158	olfactory receptor 158	1.25	0.00506
	17647477	NM_030989	Tp53	tumor protein p53	1.25	0.00166
	17810558	NM_001011977	Tekt2	tektin 2 (testicular)	1.25	0.0445
	17832139	FQ226442	Troap	trophinin associated protein	1.25	0.0312
	17655576	ENSRNOT00000004877	Gabra6	gamma-aminobutyric acid (GABA) A receptor, alpha 6	1.25	0.0122
	17796624	ENSRNOT00000048351 // ENSRNOT00000048351 // ENSRNOT00000048351 // ENSRNOT00000048351 // ENSRNOT00000048351 // ENSRNOT00000048351 // ENSRNOT00000048351 // ENSRNOT00000048351 // ENSRNOT00000048351 // ENSRNOT00000048351 // ENSRNOT00000048351 // ENSRNOT00000048351 // ENSRNOT00000048351 // ENSRNOT00000048351	LOC100361705 // RGD1565617 // LOC100361705 // RGD1565617 // LOC100361705 // RGD1565617 // LOC100361705 // RGD1565617 // LOC100361705 // RGD1565617 // LOC100361705 // RGD1565617 // LOC100361705 // RGD1565617	rCG64259-like // similar to Ig variable region, light chain // rCG64259-like // similar to Ig variable region, light chain // rCG64259-like // similar to Ig variable region, light chain // rCG64259-like // similar to Ig variable region, light chain // rCG64259-like // similar to Ig variable region, light chain // rCG64259-like // similar to Ig variable region, light chain // rCG64259-like // simi…	1.25	0.0494
	17692517	ENSRNOT00000065132	Ccdc18	coiled-coil domain containing 18	1.25	0.0437
	17835175	---	---	---	1.25	0.0426
	17780827	ENSRNOT00000015322	Napepld	N-acyl phosphatidylethanolamine phospholipase D	1.25	0.0169
	17833245	NM_001000069	Olr1020	olfactory receptor 1020	1.25	0.0269
	17667332	NM_001105860	Mzt2b	mitotic spindle organizing protein 2B	1.25	0.000892
	17789030	ENSRNOT00000007608	Pclo	piccolo (presynaptic cytomatrix protein)	1.25	0.0335
	17625302	NM_001169112	Kif11	kinesin family member 11	1.25	0.0361
	17649813	NM_001105825	Ppm1d	protein phosphatase, Mg2+/Mn2+ dependent, 1D	1.25	0.0119
	17719593	---	---	---	1.25	0.0309
	17825265	ENSRNOT00000007625	Sp4	Sp4 transcription factor	1.25	0.0461
	17860596	NM_001109541	Dnajb2	DnaJ (Hsp40) homolog, subfamily B, member 2	1.25	0.0434
	17841043	NM_001108112	Racgap1	Rac GTPase-activating protein 1	1.25	0.032
	17821133	ENSRNOT00000005774	Trib2	tribbles homolog 2 (Drosophila)	1.25	0.00196
	17817028	---	---	---	1.25	0.0329
	17682290	---	---	---	1.25	0.0498
	17861575	NM_031645	Ramp1	receptor (G protein-coupled) activity modifying protein 1	1.25	0.00295
	17708656	ENSRNOT00000022097	Plekha2	pleckstrin homology domain-containing, family A (phosphoinositide binding specific) member 2	1.25	0.00194
	17876054	NM_001108815	Tspan7	tetraspanin 7	1.24	0.000148
	17868049	---	---	---	1.24	0.0321
	17687169	---	---	---	1.24	0.0208
	17766807	BC087676	RGD1307465	similar to RIKEN cDNA 8430406I07	1.24	0.00455
	17613154	NM_019350	Syt5	synaptotagmin V	1.24	0.0146
	17772068	---	---	---	1.24	0.00513
	17843083	---	---	---	1.24	0.0086
	17824966	ENSRNOT00000066029	LOC299440	Ig heavy chain V region M167-like	1.24	0.000773
	17843391	NM_001000470	Olr1319	olfactory receptor 1319	1.24	0.0405
	17878673	---	---	---	1.24	0.00703
	17763017	ENSRNOT00000025255	Scrn3	secernin 3	1.24	0.00463
	17851954	NM_001077646	Cd3g	CD3 molecule, gamma	1.24	0.00445
	17732500	NM_001007677	Lyl1	lymphoblastic leukemia derived sequence 1	1.24	0.0113
	17687499	---	---	---	1.24	0.0463
	17698102	NM_024148	Apex1	APEX nuclease (multifunctional DNA repair enzyme) 1	1.24	0.00301
	17696594	---	---	---	1.24	0.00223
	17676759	NM_001107131	Agfg2	ArfGAP with FG repeats 2	1.24	0.0364
	17797113	---	---	---	1.24	0.0128
	17873795	---	---	---	1.24	0.0392
	17619705	---	---	---	1.24	0.0142
	17719535	XM_001061734	Hist1h2ao	histone cluster 1, H2ao	1.24	0.0451
	17662011	NM_001039019	Kif18b	kinesin family member 18B	1.24	0.0416
	17720840	BC085116	Fam107b	family with sequence similarity 107, member B	1.24	0.0077
	17615047	NM_001106243	Map4k1	mitogen activated protein kinase kinase kinase kinase 1	1.24	0.01
	17650072	NM_001107036	Mpo	myeloperoxidase	1.24	0.0156
	17847048	XM_001072207	Topbp1	topoisomerase (DNA) II binding protein 1	1.24	0.00502
	17628264	NM_001106206	Fbxo5	F-box protein 5	1.24	0.0468
	17772115	NM_001037649	Rbm43	RNA binding motif protein 43	1.24	0.0137
	17787716	NM_001003403	Apold1	apolipoprotein L domain containing 1	1.24	0.0142
	17747589	NM_001109510	Gpr171	G protein-coupled receptor 171	1.24	0.0333
	17687237	ENSRNOT00000029841	Lbr	lamin B receptor	1.24	0.0151
	17723744	---	---	---	1.24	0.0452
	17758888	---	---	---	1.24	0.00905
	17813092	ENSRNOT00000063779	RGD1564257	similar to hypothetical protein FLJ32825	1.24	0.0105
	17684316	ENSRNOT00000004408	Btg2	BTG family, member 2	1.24	0.00305
	17698134	NM_206815	Rnase6	ribonuclease, RNase A family, 6	1.24	0.00244
	17647342	NM_053749	Aurkb	aurora kinase B	1.24	0.0361
	17720551	NM_001108420	Asb13	ankyrin repeat and SOCS box-containing 13	1.24	9.91e-05
	17867205	ENSRNOT00000018644	Ndc80	NDC80 homolog, kinetochore complex component (S, cerevisiae)	1.24	0.0226
	17741633	ENSRNOT00000027234	Slc16a1	solute carrier family 16, member 1 (monocarboxylic acid transporter 1)	1.24	0.0414
	17673475	---	---	---	1.24	0.0477
	17719171	NM_001106108	Irf4	interferon regulatory factor 4	1.24	0.0161
	17861308	---	---	---	1.24	0.00152
	17787285	NM_013090	Vamp1	vesicle-associated membrane protein 1	1.24	0.00158
	17703995	NM_001107273	Cdca2	cell division cycle associated 2	1.24	0.0345
	17631323	NR_037147	RGD1303117	hypothetical protein LOC292764	1.24	0.00199
	17704935	---	---	---	1.24	0.0393
	17816230	NM_001109483	Lrr1	leucine rich repeat protein 1	1.24	0.0109
	17665859	NM_183325	Adprh	ADP-ribosylarginine hydrolase	1.24	0.00075
	17828449	XM_001081056	RGD1561871	similar to ribosomal protein S10	1.24	0.03
	17780391	---	---	---	1.24	0.0381
	17828344	NM_001017459	Mdm1	Mdm1 nuclear protein homolog (mouse)	1.24	0.00559
	17678957	NM_053677	Chek2	checkpoint kinase 2	1.24	0.0486
	17788070	---	---	---	1.24	0.0479
	17673668	NM_001170554	Mphosph9	M-phase phosphoprotein 9	1.23	0.0162
	17867362	---	---	---	1.23	0.00176
	17611325	XM_217737	Cep72	centrosomal protein 72	1.23	0.0376
	17823789	---	---	---	1.23	0.0186
	17700041	ENSRNOT00000013408	Htr2a	5-hydroxytryptamine (serotonin) receptor 2A	1.23	0.0136
	17859102	NM_001106911	Mfsd6	major facilitator superfamily domain containing 6	1.23	0.0157
	17656253	NM_001109031	Ccdc69	coiled-coil domain containing 69	1.23	0.0398
	17778461	NM_001098724	Necab3	N-terminal EF-hand calcium binding protein 3	1.23	0.00347
	17673385	---	---	---	1.23	0.0416
	17738224	ENSRNOT00000058250 // ENSRNOT00000058250	LOC100365525 // LOC689617	rCG65904-like // similar to GTPase activating protein testicular GAP1	1.23	0.01
	17656471	NM_001000780	Olr1421	olfactory receptor 1421	1.23	0.041
	17785294	NM_001025047 // NM_001025047 // NM_001025047	LOC500251 // LOC500251 // LOC500251	hypothetical protein LOC500251 // hypothetical protein LOC500251 // hypothetical protein LOC500251	1.23	0.0173
	17671156	NM_001099480	Vom2r60	vomeronasal 2 receptor, 60	1.23	0.0166
	17762001	---	---	---	1.23	0.00569
	17735968	BC078991	RGD1306227	similar to 4833420G17Rik protein	1.23	0.0309
	17623163	XM_002728856	LOC100361939	AYP1 protein	1.23	0.00026
	17742771	---	---	---	1.23	0.0458
	17758167	NM_001107625	Rtkn2	rhotekin 2	1.23	0.0276
	17778928	NM_001134619	Tti1	TELO2 interacting protein 1	1.23	0.0409
	17629701	NM_001076793	Lilra5	leukocyte immunoglobulin-like receptor, subfamily A (with TM domain), member 5	1.23	0.0345
	17870260	---	---	---	1.23	0.00854
	17675391	---	---	---	1.23	0.0212
	17879334	---	---	---	1.23	0.0176
	17671334	ENSRNOT00000036279	LOC689143	similar to QUAhog (hedgehog related) family member (qua-1)	1.23	0.0114
	17700228	---	---	---	1.23	0.00382
	17701211	---	---	---	1.23	0.0465
	17635690	ENSRNOT00000055203	Trim30	tripartite motif-containing 30	1.23	0.0394
	17833606	NM_001011986	Sf3a2	splicing factor 3a, subunit 2	1.23	0.000177
	17696446	NM_001134702	Meis1	Meis homeobox 1	1.23	0.0368
	17831416	NM_001130500	Gtse1	G-2 and S-phase expressed 1	1.23	0.0243
	17799919	---	---	---	1.23	0.0101
	17875692	NM_001106757	Cfp	complement factor properdin	1.23	0.00488
	17818321	NM_024147	Evl	Enah/Vasp-like	1.23	0.000662
	17634753	NM_001099512	Vom2r43	vomeronasal 2 receptor, 43	1.23	0.0217
	17618176	ENSRNOT00000035257 // ENSRNOT00000035257	LOC682465 // LOC680217	similar to Ferritin light chain 2 (Ferritin L subunit 2) (Ferritin subunit LG) // similar to Ferritin light chain 2 (Ferritin L subunit 2) (Ferritin subunit LG)	1.23	0.00495
	17789167	BC162037	RGD1562351	similar to chromosome 7 open reading frame 23	1.23	0.013
	17806796	NM_001106676	RGD1310376	similar to hypothetical protein FLJ14642	1.23	0.0185
	17790934	NM_001009173	Tryx5	trypsin X5	1.23	0.0254
	17773189	---	---	---	1.23	0.0127
	17696000	---	---	---	1.23	0.0047
	17673745	NM_001105928	Vps37b	vacuolar protein sorting 37 homolog B (S, cerevisiae)	1.23	0.00667
	17681552	NM_001030024	Slc19a2	solute carrier family 19 (thiamine transporter), member 2	1.23	0.00312
	17717038	NM_001107366	Mcm10	minichromosome maintenance complex component 10	1.23	0.0342
	17731639	NM_001256466 // NM_001256466 // NM_001256466	LOC498972 // LOC498972 // LOC498972	similar to copine II // similar to copine II // similar to copine II	1.23	0.00599
	17756215	NM_001166275	Mdc1	mediator of DNA damage checkpoint 1	1.23	0.0391
	17735104	---	---	---	1.23	0.0083
	17771237	XM_001079857	Fam78a	family with sequence similarity 78, member A	1.23	0.00848
	17674323	---	---	---	1.23	0.0194
	17727514	---	---	---	1.23	0.000912
	17689729	---	---	---	1.23	0.014
	17619026	NM_001013236 // NM_001013236 // NM_001013236	Rrm1 // Rrm1 // Rrm1	ribonucleotide reductase M1 // ribonucleotide reductase M1 // ribonucleotide reductase M1	1.22	0.0282
	17881038	---	---	---	1.22	0.000242
	17880579	NM_001076553	Pkib	protein kinase (cAMP-dependent, catalytic) inhibitor beta	1.22	0.0163
	17815757	NM_001106726	G2e3	G2/M-phase specific E3 ubiquitin protein ligase	1.22	0.0283
	17839434	NM_001130504	Cenpm	centromere protein M	1.22	0.0228
	17847555	ENSRNOT00000025311	Camkv	CaM kinase-like vesicle-associated	1.22	0.00992
	17693302	NM_001105725	Ccng2	cyclin G2	1.22	0.0146
	17867377	---	---	---	1.22	0.0304
	17869668	---	---	---	1.22	0.0304
	17676422	ENSRNOT00000060155	MGC112692	similar to Leukosialin precursor (Leucocyte sialoglycoprotein) (Sialophorin) (CD43) (W3/13 antigen)	1.22	0.00078
	17782404	NM_001009709	Tmem140	transmembrane protein 140	1.22	0.00202
	17678194	NM_001108335	Rasal1	RAS protein activator like 1 (GAP1 like)	1.22	0.00669
	17641812	NM_019277 // NM_019277 // NM_019277	Exoc6 // Exoc6 // Exoc6	exocyst complex component 6 // exocyst complex component 6 // exocyst complex component 6	1.22	0.00478
	17786994	NM_001130988	Slbp	stem-loop binding protein	1.22	0.0493
	17870789	ENSRNOT00000005659	RGD1559731	similar to RIKEN cDNA 4930578C19	1.22	0.0283
	17637412	NM_001012460	2013-09-01	septin 1	1.22	0.0394
	17635220	ENSRNOT00000029629 // ENSRNOT00000029629	LOC685009 // LOC683565	hypothetical protein LOC685009 // hypothetical protein LOC683565	1.22	0.00137
	17635184	---	---	---	1.22	0.0322
	17617129	---	---	---	1.22	0.0232
	17619732	---	---	---	1.22	0.000712
	17692547	NM_001100898	Mtf2	metal response element binding transcription factor 2	1.22	0.00803
	17691617	NM_001107237	Ikzf1	IKAROS family zinc finger 1	1.22	0.00967
	17838879	FQ225154	Apol3	apolipoprotein L, 3	1.22	0.0448
	17693992	ENSRNOT00000032156	Cep135	centrosomal protein 135	1.22	0.0156
	17710872	BC158860	Pde4c	phosphodiesterase 4C, cAMP-specific	1.22	0.027
	17743238	NM_001009708	Lmo4	LIM domain only 4	1.22	0.00777
	17748293	ENSRNOT00000013290	LOC679811	similar to RIKEN cDNA D930015E06	1.22	0.0106
	17755554	---	---	---	1.22	0.00886
	17865624	NM_080582	Abcb6	ATP-binding cassette, subfamily B (MDR/TAP), member 6	1.22	0.00667
	17754713	NM_001134576	RGD1306739	similar to RIKEN cDNA 1700040L02	1.22	0.0267
	17767437	ENSRNOT00000010851	Tpx2	TPX2, microtubule-associated, homolog (Xenopus laevis)	1.22	0.0476
	17681825	ENSRNOT00000047434	Fcgr3a	Fc fragment of IgG, low affinity IIIa, receptor	1.22	0.0142
	17828572	NM_023026	Agap2	ArfGAP with GTPase domain, ankyrin repeat and PH domain 2	1.22	0.006
	17847732	NM_001014214	Dalrd3	DALR anticodon binding domain containing 3	1.22	0.000777
	17696859	NM_022605 // NM_022605 // NM_022605	Hpse // Hpse // Hpse	heparanase // heparanase // heparanase	1.22	0.0473
	17761801	NM_001000395	Olr429	olfactory receptor 429	1.22	0.027
	17800985	---	---	---	1.22	0.0163
	17869355	NM_001109421	Ebi3	Epstein-Barr virus induced 3	1.22	0.033
	17851821	---	---	---	1.22	0.038
	17869532	---	---	---	1.22	0.0237
	17751674	---	---	---	1.22	0.015
	17663341	ENSRNOT00000010466	Unc13d	unc-13 homolog D (C, elegans)	1.22	0.0172
	17690305	NM_022390	Qdpr	quinoid dihydropteridine reductase	1.22	2.48e-05
	17829009	---	---	---	1.22	0.00913
	17696709	NM_001191553	Ccdc85a	coiled-coil domain containing 85A	1.22	0.0117
	17693682	NM_133513	Prol1	proline rich, lacrimal 1	1.22	0.0282
	17828081	ENSRNOT00000031986	E2f7	E2F transcription factor 7	1.22	0.0411
	17798876	NM_001108666	Smc2	structural maintenance of chromosomes 2	1.22	0.0453
	17661681	ENSRNOT00000028109	Brca1	breast cancer 1	1.22	0.0448
	17625627	NM_001109515	Slc25a28	solute carrier family 25, member 28	1.22	0.00637
	17645159	NM_053820	Ebf1	early B-cell factor 1	1.22	0.00861
	17818645	---	---	---	1.22	0.0154
	17808508	NM_053718 // NM_053718 // NM_053718	Mllt3 // Mllt3 // Mllt3	myeloid/lymphoid or mixed-lineage leukemia (trithorax homolog, Drosophila); translocated to, 3 // myeloid/lymphoid or mixed-lineage leukemia (trithorax homolog, Drosophila); translocated to, 3 // myeloid/lymphoid or mixed-lineage leukemia (trithorax homolog, Drosophila); translocated to, 3	1.22	0.00467
	17819299	BC092586 // BC092586 // BC092586	Igh-6 // Igh-6 // Igh-6	immunoglobulin heavy chain 6 // immunoglobulin heavy chain 6 // immunoglobulin heavy chain 6	1.22	0.0263
	17754704	ENSRNOT00000000783	Cdk1	cyclin-dependent kinase 1	1.22	0.0495
	17672643	NM_001109451	Ppp1r35	protein phosphatase 1, regulatory subunit 35	1.22	0.00628
	17775832	NM_001033999	Rpap1	RNA polymerase II associated protein 1	1.22	0.00412
	17678770	NM_001191666	Tchp	trichoplein, keratin filament binding	1.22	0.042
	17653412	NM_001039207	Narf	nuclear prelamin A recognition factor	1.22	0.0427
	17635516	NM_001082572	Trim21	tripartite motif-containing 21	1.22	0.0109
	17690970	NM_001107231	Zfp278	zinc finger protein 278	1.22	0.00697
	17880301	---	---	---	1.22	0.0111
	17789098	XM_003753860	LOC688874	similar to NEDD4-binding protein 1 (N4BP1)	1.22	0.00679
	17866137	BC088179	RGD1563917	similar to Nuclear autoantigen Sp-100 (Speckled 100 kDa)	1.22	0.0251
	17710605	NM_001007684	Klf2	Kruppel-like factor 2 (lung)	1.22	0.00137
	17831505	NM_001134800	Zbed4	zinc finger, BED-type containing 4	1.22	0.00657
	17635551	NM_001000140	Olr92	olfactory receptor 92	1.22	0.00519
	17647889	NM_001008361	Rnf167	ring finger protein 167	1.22	0.0254
	17722250	---	---	---	1.22	0.000421
	17691990	ENSRNOT00000009421	Bcl11a	B-cell CLL/lymphoma 11A (zinc finger protein)	1.22	0.0231
	17865685	NM_001007004	Tuba4a	tubulin, alpha 4A	1.22	0.0447
	17778379	NM_001106528	Plagl2	pleiomorphic adenoma gene-like 2	1.21	0.01
	17693420	NM_173114 // NM_173114 // NM_173114	Parm1 // Parm1 // Parm1	prostate androgen-regulated mucin-like protein 1 // prostate androgen-regulated mucin-like protein 1 // prostate androgen-regulated mucin-like protein 1	1.21	0.0273
	17824022	NM_206846	Ifi27l2b	interferon, alpha-inducible protein 27 like 2B	1.21	0.0241
	17725568	---	---	---	1.21	0.0394
	17734746	XM_345065	Zfp296	zinc finger protein 296	1.21	0.0101
	17841953	NM_001014205	Tmem123	transmembrane protein 123	1.21	0.01
	17649882	NM_001009624	Ska2	spindle and kinetochore associated complex subunit 2	1.21	0.0197
	17692682	NM_001108352	Cdc7	cell division cycle 7 homolog (S, cerevisiae)	1.21	0.0263
	17787768	---	---	---	1.21	0.0256
	17696581	NM_001107240	B3gnt2	UDP-GlcNAc:betaGal beta-1,3-N-acetylglucosaminyltransferase 2	1.21	0.0104
	17814865	---	---	---	1.21	0.0273
	17619442	ENSRNOT00000040345	Olr281	olfactory receptor 281	1.21	0.0398
	17637515	NM_001109156	Prss53	protease, serine, 53	1.21	0.0196
	17633312	BC099080	E2f8	E2F transcription factor 8	1.21	0.0471
	17658675	NM_133591	Rph3al	rabphilin 3A-like (without C2 domains)	1.21	0.00366
	17697396	NM_001009971 // NM_001009971 // NM_001009971	Spetex-2G // Spetex-2G // Spetex-2G	Spetex-2G protein // Spetex-2G protein // Spetex-2G protein	1.21	0.0175
	17778813	NM_001025768	Dsn1	DSN1, MIND kinetochore complex component, homolog (S, cerevisiae)	1.21	0.0448
	17639156	NM_001081980	Tbc1d10c	TBC1 domain family, member 10C	1.21	0.0237
	17694931	NM_030848 // NM_030848 // NM_030848	Bst1 // Bst1 // Bst1	bone marrow stromal cell antigen 1 // bone marrow stromal cell antigen 1 // bone marrow stromal cell antigen 1	1.21	0.0121
	17876971	NM_001192003	Fancb	Fanconi anemia, complementation group B	1.21	0.045
	17869279	NM_001008882	Uhrf1	ubiquitin-like with PHD and ring finger domains 1	1.21	0.0469
	17724626	NM_001107371	Neto1	neuropilin (NRP) and tolloid (TLL)-like 1	1.21	0.0091
	17742569	ENSRNOT00000055611	RGD1305834	similar to hypothetical protein FLJ11331	1.21	0.0232
	17677804	---	---	---	1.21	0.022
	17752296	NM_001000509	Olr1709	olfactory receptor 1709	1.21	0.00985
	17825934	---	---	---	1.21	0.0451
	17658968	NM_001191924	Nlk	nemo like kinase	1.21	0.013
	17796326	AB073719	Sox5	SRY-box containing gene 5	1.21	0.00262
	17752044	ENSRNOT00000016668	RGD1559958	similar to RIKEN cDNA C030011O14 gene	1.21	0.0173
	17856330	---	---	---	1.21	0.0197
	17849630	NM_199397	Panx1	Pannexin 1	1.21	0.014
	17766478	NM_012631	Prnp	prion protein	1.21	0.029
	17716183	NM_053847	Map3k8	mitogen-activated protein kinase kinase kinase 8	1.21	0.00437
	17868190	XM_003751850 // XM_003751850 // XM_003751850	LOC688649 // LOC688649 // LOC688649	similar to spermatogenesis associated glutamate (E)-rich protein 4d // similar to spermatogenesis associated glutamate (E)-rich protein 4d // similar to spermatogenesis associated glutamate (E)-rich protein 4d	1.21	0.0396
	17841614	NM_001106797	Cbx5	chromobox homolog 5	1.21	0.00953
	17769449	---	---	---	1.21	0.00954
	17791208	ENSRNOT00000049038	Gimap6	GTPase, IMAP family member 6	1.21	0.0016
	17734222	NM_001108453	Cbfa2t3	core-binding factor, runt domain, alpha subunit 2; translocated to, 3	1.21	0.00338
	17672498	ENSRNOT00000042713	RGD1559730	similar to putative pheromone receptor (Go-VN4)	1.21	0.0497
	17815320	ENSRNOT00000009473	Slc26a3	solute carrier family 26, member 3	1.21	0.05
	17766246	---	---	---	1.21	0.0123
	17711394	---	---	---	1.21	0.00764
	17744164	NM_001191957	Msh3	mutS homolog 3 (E, coli)	1.21	0.00606
	17829943	NM_001017467	Ly6e	lymphocyte antigen 6 complex, locus E	1.21	0.0361
	17827113	---	---	---	1.21	0.0271
	17852614	NM_017085 // NM_017085 // NM_017085	Cyp19a1 // Cyp19a1 // Cyp19a1	cytochrome P450, family 19, subfamily a, polypeptide 1 // cytochrome P450, family 19, subfamily a, polypeptide 1 // cytochrome P450, family 19, subfamily a, polypeptide 1	1.21	0.00916
	17857463	NM_001134710	Cnpy3	canopy 3 homolog (zebrafish)	1.21	0.000781
	17726564	NM_001109513	Grpel2	GrpE-like 2, mitochondrial	1.21	0.0149
	17702644	NM_001013995	Haus4	HAUS augmin-like complex, subunit 4	1.21	0.0321
	17699651	XM_237949	RGD1562099	similar to putative protein product of HMFN0672	1.21	0.032
	17615756	NM_001106250	Siglec10	sialic acid binding Ig-like lectin 10	1.21	0.0171
	17761984	NM_001013917	Arhgap15	Rho GTPase activating protein 15	1.21	0.0304
	17809656	NM_001085369	Kif2c	kinesin family member 2C	1.21	0.0327
	17855688	NM_001108187	Fam212a	family with sequence similarity 212, member A	1.21	0.0112
	17825853	NM_001001357	Olr907	olfactory receptor 907	1.21	0.0131
	17833200	NM_001001368	Olr943	olfactory receptor 943	1.21	0.0372
	17646579	ENSRNOT00000057947	Tnfrsf13b	tumor necrosis factor receptor superfamily, member 13B	1.21	0.00336
	17677535	ENSRNOT00000065918 // ENSRNOT00000065918	Tect2 // Atp6v0a2	tectonic 2 // ATPase, H+ transporting, lysosomal V0 subunit A2	1.21	0.00476
	17628529	ENSRNOT00000050014	Park2	parkinson protein 2, E3 ubiquitin protein ligase	1.21	0.0391
	17862345	NM_001191814	Mettl4	methyltransferase like 4	1.21	0.0309
	17735139	NM_130400	Dhfr	dihydrofolate reductase	1.21	0.0121
	17809486	XR_146990	LOC366449	hypothetical LOC366449	1.21	0.0321
	17639814	NM_019152	Capn1	calpain 1, (mu/I) large subunit	1.21	0.00305
	17801619	---	---	---	1.21	0.0274
	17660863	ENSRNOT00000050725	Top2a	topoisomerase (DNA) II alpha	1.21	0.0317
	17736384	ENSRNOT00000022455	Nadkd1	NAD kinase domain containing 1	1.21	0.0426
	17653841	ENSRNOT00000061253	Sec14l5	SEC14-like 5 (S, cerevisiae)	1.21	0.028
	17717138	---	---	---	1.21	0.00484
	17864386	NM_001012226	Stat4	signal transducer and activator of transcription 4	1.21	0.025
	17690744	NM_001191680	Mfsd10	major facilitator superfamily domain containing 10	1.21	0.00341
	17667247	ENSRNOT00000046664	RGD1308065	hypothetical LOC287935	1.21	0.00409
	17822611	---	---	---	1.21	0.028
	17686252	ENSRNOT00000004387	Rcsd1	RCSD domain containing 1	1.2	0.0161
	17637458	ENSRNOT00000024969	Zfp689	zinc finger protein 689	1.2	0.0104
	17650017	NM_001135921	Rnf43	ring finger protein 43	1.2	0.0112
	17860936	XM_001062967	Csprs	component of Sp100-rs	1.2	0.0332
	17763619	NM_001000676	Olr518	olfactory receptor 518	1.2	0.038
	17634768	NM_001000937	Olr17	olfactory receptor 17	1.2	0.0451
	17781545	BC166806	Glcci1	glucocorticoid induced transcript 1	1.2	0.00163
	17683014	NM_001108858	RGD1309586	similar to probable ATP-dependent RNA helicase - mouse	1.2	0.0252
	17792579	NM_001106600	Wbp1	WW domain binding protein 1	1.2	0.00223
	17785298	NM_033442	Gata2	GATA binding protein 2	1.2	0.0282
	17655107	BC091567	Hba-a2	hemoglobin alpha, adult chain 2	1.2	0.0153
	17850971	ENSRNOT00000011226	Chek1	checkpoint kinase 1	1.2	0.0157
	17861931	---	---	---	1.2	0.042
	17868085	ENSRNOT00000041850 // ENSRNOT00000041850 // ENSRNOT00000041850 // ENSRNOT00000041850 // ENSRNOT00000041850 // ENSRNOT00000041850 // ENSRNOT00000041850 // ENSRNOT00000041850 // ENSRNOT00000041850 // ENSRNOT00000041850 // ENSRNOT00000041850 // ENSRNOT00000041850 // ENSRNOT00000041850 // ENSRNOT00000041850 // ENSRNOT00000041850 // ENSRNOT00000041850 // ENSRNOT00000041850 // ENSRNOT00000041850 // ENS…	LOC100364306 // LOC691410 // LOC691403 // LOC690867 // LOC690626 // LOC690523 // LOC690439 // LOC690281 // LOC690122 // LOC690010 // LOC689948 // LOC689905 // LOC689837 // LOC689667 // LOC689658 // LOC688732 // LOC688587 // LOC688428 // LOC687062 // LOC686719 // LOC686131 // LOC686017 // LOC685989 // LOC685966 // LOC685853 // LOC680748 // LOC680198 // LOC501349 // LOC501299 // LOC100364306 // LOC…	hypothetical protein LOC100364306 // similar to Discs large homolog 5 (Placenta and prostate DLG) (Discs large protein P-dlg) // hypothetical protein LOC691403 // similar to Discs large homolog 5 (Placenta and prostate DLG) (Discs large protein P-dlg) // hypothetical protein LOC690626 // hypothetical protein LOC690523 // similar to spermatogenesis associated glutamate (E)-rich protein 4d // simil…	1.2	0.0144
	17773398	---	---	---	1.2	0.0414
	17863402	ENSRNOT00000018552	Kcnq5l	potassium voltage-gated channel, subfamily Q, member 5-like	1.2	0.0154
	17712688	ENSRNOT00000018529	Defa24	defensin, alpha, 24	1.2	0.0345
	17774379	NM_001000574	Olr729	olfactory receptor 729	1.2	0.0494
	17781913	ENSRNOT00000010429	Arf5	ADP-ribosylation factor 5	1.2	0.025
	17721820	---	---	---	1.2	0.000914
	17735640	BC104707	LOC100359861	mCG51409-like	1.2	0.000575
	17800738	NM_001107953 // NM_001107953 // NM_001107953	Zcchc11 // Zcchc11 // Zcchc11	zinc finger, CCHC domain containing 11 // zinc finger, CCHC domain containing 11 // zinc finger, CCHC domain containing 11	1.2	0.00171
	17674977	---	---	---	1.2	0.0161
	17794709	ENSRNOT00000015570	Clstn3	calsyntenin 3	1.2	0.00322
	17709864	---	---	---	1.2	0.0374
	17786459	NM_001024334	LOC500300	similar to hypothetical protein MGC6835	1.2	0.0204
	17672632	NM_001044284	Tsc22d4	TSC22 domain family, member 4	1.2	0.0116
	17613711	NM_001013895	Prkd2	protein kinase D2	1.2	0.00562
	17676720	NM_001025629	Mospd3	motile sperm domain containing 3	1.2	0.000302
	17874930	---	---	---	1.2	0.0186
	17697502	---	---	---	1.2	0.0299
	17687699	NM_001014132	Traf3ip3	TRAF3 interacting protein 3	1.2	0.00352
	17689469	ENSRNOT00000036206	RGD1311309	similar to 2510002A14Rik protein	1.2	0.0132
	17680533	---	---	---	1.2	0.038
	17613440	NM_001008944	Vom1r59	vomeronasal 1 receptor 59	1.2	0.027
	17675525	---	---	---	1.2	0.0108
	17612331	NM_001107465 // NM_001107465 // NM_001107465	Chd1 // Chd1 // Chd1	chromodomain helicase DNA binding protein 1 // chromodomain helicase DNA binding protein 1 // chromodomain helicase DNA binding protein 1	1.2	0.00707
	17619871	NM_001108501	Ccp110	centriolar coiled coil protein 110kDa	1.2	0.033
	17674329	NM_001107146	Rfc5	replication factor C (activator 1) 5	1.2	0.0176
	17782466	NM_001195503	LOC689574	hypothetical protein LOC689574	1.2	0.0324
	17805250	NM_181478	Rdh10	retinol dehydrogenase 10 (all-trans)	1.2	0.0196
	17821561	NM_001200045 // NM_001200045 // NM_001200045	RGD1563092 // RGD1563092 // RGD1563092	similar to histone deacetylase-related protein // similar to histone deacetylase-related protein // similar to histone deacetylase-related protein	1.2	0.00282
	17880511	XM_001079838	RGD1566247	similar to 40S ribosomal protein S2	1.2	0.0178
	17867028	XM_003754559	RGD1566007	similar to hypothetical protein 4930509O22	1.2	0.0339
	17772405	NM_001012086	Cytip	cytohesin 1 interacting protein	1.2	0.000352
	17689216	NM_001004098	Cenpc1	centromere protein C 1	1.2	0.0178
	17712561	NM_001108877	Tpte	transmembrane phosphatase with tensin homology	1.2	0.0201
	17880391	---	---	---	1.2	0.0258
	17643853	ENSRNOT00000005109	Nmral1	NmrA-like family domain containing 1	1.2	0.0203
	17813061	NM_017304	Kcnab2	potassium voltage-gated channel, shaker-related subfamily, beta member 2	1.2	0.0186
	17880303	---	---	---	1.2	0.009
	17844138	XM_236272	Exph5	exophilin 5	1.2	0.00138
	17787805	NM_001109610	H2afj	H2A histone family, member J	1.2	0.0307
	17858841	NM_001108216	Nck2	NCK adaptor protein 2	1.2	0.00955
	17790877	---	---	---	1.2	0.00239
	17665346	NM_001109435	Fam55c	family with sequence similarity 55, member C	1.2	0.0389
	17653543	XM_222529	RGD1565158	similar to RIKEN cDNA 4921537P18	1.2	0.000574
	17823765	NM_001108048	Rps6ka5	ribosomal protein S6 kinase, polypeptide 5	1.2	0.0234
	17614461	NM_001107493	Exosc5	exosome component 5	1.2	0.00371
	17871113	NM_001106956	Suv39h1	suppressor of variegation 3-9 homolog 1 (Drosophila)	1.2	0.0482
	17616960	---	---	---	1.2	0.00982
	17671538	---	---	---	1.2	0.00819
	17777749	---	---	---	1.2	0.0454
	17831028	NM_139080	Xrcc6	X-ray repair complementing defective repair in Chinese hamster cells 6	1.19	0.007
	17780691	---	---	---	1.19	0.0019
	17748676	ENSRNOT00000035383	Pmf1	polyamine-modulated factor 1	1.19	0.00802
	17618963	BC169022	Trpc2	transient receptor potential cation channel, subfamily C, member 2	1.19	0.0142
	17823503	BC089965	LOC500700	similar to chromosome 14 open reading frame 145	1.19	0.0135
	17765481	ENSRNOT00000036209	Wdr76	WD repeat domain 76	1.19	0.0293
	17613080	NM_001107476	Tmem150b	transmembrane protein 150B	1.19	0.0177
	17823717	NM_001024350	Efcab11	EF-hand calcium binding domain 11	1.19	0.0365
	17738449	NM_001191846	Foxo1	forkhead box O1	1.19	0.00505
	17755982	NM_022921	RT1-M3-1	RT1 class Ib, locus M3, gene 1	1.19	0.0151
	17686884	NM_001012029	Ifi204	interferon activated gene 204	1.19	0.0163
	17620907	---	---	---	1.19	0.0122
	17868119	---	---	---	1.19	0.00589
	17857706	NM_001106892 // NM_001106892 // NM_001106892	Enpp4 // Enpp4 // Enpp4	ectonucleotide pyrophosphatase/phosphodiesterase 4 // ectonucleotide pyrophosphatase/phosphodiesterase 4 // ectonucleotide pyrophosphatase/phosphodiesterase 4	1.19	0.0242
	17792005	ENSRNOT00000058299	LOC690683	Ig kappa chain V-III region VG-like	1.19	0.00637
	17776864	---	---	---	1.19	0.0171
	17681399	---	---	---	1.19	0.0258
	17862354	---	---	---	1.19	0.00919
	17787558	NM_001134716 // NM_001134716 // NM_001134716	Clec12a // Clec12a // Clec12a	C-type lectin domain family 12, member A // C-type lectin domain family 12, member A // C-type lectin domain family 12, member A	1.19	0.0232
	17627977	---	---	---	1.19	0.0154
	17723147	NM_001107387	Tnfaip8	tumor necrosis factor, alpha-induced protein 8	1.19	0.018
	17791807	---	---	---	1.19	0.0377
	17736478	NM_001106419	Rad1	RAD1 homolog (S, pombe)	1.19	0.00387
	17873566	NM_001014106 // NM_001014106 // NM_001014106	Rfk // Rfk // Rfk	riboflavin kinase // riboflavin kinase // riboflavin kinase	1.19	0.00815
	17721679	---	---	---	1.19	0.0446
	17776942	---	---	---	1.19	0.0499
	17665865	ENSRNOT00000038400	Pla1a	phospholipase A1 member A	1.19	0.00337
	17708619	NM_001012158	Letm2	leucine zipper-EF-hand containing transmembrane protein 2	1.19	0.0167
	17711491	NM_017187	Hmgb2	high mobility group box 2	1.19	0.0268
	17651104	NM_017064	Stat5a	signal transducer and activator of transcription 5A	1.19	0.00159
	17792806	NM_022635	Nat8	N-acetyltransferase 8	1.19	0.0206
	17667528	NM_001108312	RGD1563888	similar to DNA segment, Chr 16, ERATO Doi 472, expressed	1.19	0.00573
	17855137	---	---	---	1.19	0.0139
	17636409	---	---	---	1.19	0.0292
	17677640	NM_001134763	Hip1r	huntingtin interacting protein 1 related	1.19	0.0237
	17849725	---	---	---	1.19	0.000763
	17804380	NM_001012107	Gpr157	G protein-coupled receptor 157	1.19	0.0363
	17860801	---	---	---	1.19	0.0342
	17719969	BC098858	Epc1	enhancer of polycomb homolog 1 (Drosophila)	1.19	0.00108
	17735669	NM_001107651	Depdc1b	DEP domain containing 1B	1.19	0.0343
	17870861	ENSRNOT00000004034	Ppp1r2-ps1	protein phosphatase 1, regulatory (inhibitor) subunit 2, pseudogene 1	1.19	0.019
	17820043	NM_053522 // NM_053522	Rhoq // Rhoq	ras homolog gene family, member Q // ras homolog gene family, member Q	1.19	0.00855
	17816241	ENSRNOT00000064668	Klhdc1	kelch domain containing 1	1.19	0.0273
	17845940	---	---	---	1.19	0.0257
	17805276	NM_054000	Kcnb2	potassium voltage gated channel, Shab-related subfamily, member 2	1.19	0.0129
	17683919	---	---	---	1.19	0.0433
	17752062	NM_019123	St6galnac3	ST6 (alpha-N-acetyl-neuraminyl-2,3-beta-galactosyl-1,3)-N-acetylgalactosaminide alpha-2,6-sialyltransferase 3	1.19	0.043
	17716928	NM_017197	Celf2	CUGBP, Elav-like family member 2	1.19	0.0111
	17789283	---	---	---	1.19	0.00787
	17713841	NM_012557	Fancc	Fanconi anemia, complementation group C	1.19	0.0139
	17833060	NM_199501	Cdk2	cyclin dependent kinase 2	1.19	0.0286
	17812668	---	---	---	1.19	0.0405
	17878754	NM_001012230	Xkrx	XK, Kell blood group complex subunit-related, X-linked	1.19	0.00126
	17661160	ENSRNOT00000064097	Krtap4-3	keratin associated protein 4-3	1.19	0.026
	17863710	---	---	---	1.19	0.00805
	17846140	---	---	---	1.19	0.00357
	17642062	NM_001025767	Blnk	B-cell linker	1.19	0.00822
	17733134	NM_001037193	Acd	adrenocortical dysplasia homolog (mouse)	1.19	0.00198
	17684795	---	---	---	1.19	0.00982
	17807822	ENSRNOT00000046760	Mup5	major urinary protein 5	1.19	0.0271
	17642902	ENSRNOT00000047903	Gpam	glycerol-3-phosphate acyltransferase, mitochondrial	1.19	0.0191
	17702030	NM_001012476	Rnase11	ribonuclease, RNase A family, 11 (non-active)	1.19	0.0285
	17615650	---	---	---	1.19	0.0461
	17764597	NM_001044301	Muc15	mucin 15, cell surface associated	1.19	0.0423
	17862551	ENSRNOT00000067623	RGD1308299	similar to chromosome 6 open reading frame 130	1.19	0.024
	17682489	ENSRNOT00000003641	Cnst	consortin, connexin sorting protein	1.19	0.0129
	17690129	XM_223453	RGD1562755	similar to 60S ribosomal protein L23a	1.19	0.0157
	17640507	ENSRNOT00000028092	Tmem138	transmembrane protein 138	1.19	0.00453
	17854117	NM_001011998	Fbxo9	f-box protein 9	1.19	0.0474
	17761626	---	---	---	1.19	0.0356
	17750841	NM_012889	Vcam1	vascular cell adhesion molecule 1	1.19	0.0399
	17662418	NM_031983	Smarcd2	SWI/SNF related, matrix associated, actin dependent regulator of chromatin, subfamily d, member 2	1.19	0.0151
	17794572	NM_031649	Klrg1	killer cell lectin-like receptor subfamily G, member 1	1.19	0.028
	17665312	NM_001105888 // NM_001105888 // NM_001105888	Senp7 // Senp7 // Senp7	SUMO1/sentrin specific peptidase 7 // SUMO1/sentrin specific peptidase 7 // SUMO1/sentrin specific peptidase 7	1.19	0.0357
	17722579	NM_001017932	Wdr55	WD repeat domain 55	1.19	0.0112
	17672731	NM_001105919	Fis1	fission 1 (mitochondrial outer membrane) homolog (S, cerevisiae)	1.19	0.00905
	17679423	ENSRNOT00000003625	Serpinb5	serpin peptidase inhibitor, clade B (ovalbumin), member 5	1.19	0.0028
	17764640	NM_001000373	Olr773	olfactory receptor 773	1.19	0.031
	17750632	---	---	---	1.19	0.0206
	17867704	BC082068	LOC363337	similar to RIKEN cDNA 1700081O22	1.19	0.019
	17665061	---	---	---	1.19	0.0171
	17663823	NM_139096	Lgals3bp	lectin, galactoside-binding, soluble, 3 binding protein	1.19	0.0208
	17615140	NM_001107500	Zfp84	zinc finger protein 84	1.19	0.0194
	17826366	NM_001035237	Tcf3	transcription factor 3	1.19	0.0105
	17611549	---	---	---	1.19	0.00228
	17700421	NM_001013997	Bora	bora, aurora kinase A activator	1.19	0.0497
	17819362	---	---	---	1.19	0.0204
	17643059	BC105867 // BC105867 // BC105867	Ablim1 // Ablim1 // Ablim1	actin-binding LIM protein 1 // actin-binding LIM protein 1 // actin-binding LIM protein 1	1.18	0.00173
	17620723	NM_001025725	Hirip3	HIRA interacting protein 3	1.18	0.00979
	17834527	NM_001012222	Fbxo7	F-box protein 7	1.18	0.025
	17763728	NM_001000644	Olr640	olfactory receptor 640	1.18	0.00684
	17864155	---	---	---	1.18	0.0142
	17750450	ENSRNOT00000047139	Gstm1	glutathione S-transferase mu 1	1.18	6.71e-05
	17660657	---	---	---	1.18	0.00613
	17739272	BC162053	RGD1560010	RGD1560010	1.18	0.0472
	17626246	NM_001106365	Taf5	TAF5 RNA polymerase II, TATA box binding protein (TBP)-associated factor	1.18	0.0284
	17772040	NM_001024274	Gtdc1	glycosyltransferase-like domain containing 1	1.18	0.0264
	17715833	NM_001109417	Hist1h1b	histone cluster 1, H1b	1.18	0.0444
	17667728	XM_002727850	LOC100363136	hypothetical protein LOC100363136	1.18	0.0235
	17874853	---	---	---	1.18	0.0276
	17874328	NM_001134992	Sash3	SAM and SH3 domain containing 3	1.18	0.0201
	17840441	NM_138832	Slc38a1	solute carrier family 38, member 1	1.18	0.0148
	17771785	NM_001108953	Zbtb6	zinc finger and BTB domain containing 6	1.18	0.00401
	17741483	NM_001191569	Dennd2c	DENN/MADD domain containing 2C	1.18	0.0277
	17667474	---	---	---	1.18	0.0469
	17678383	ENSRNOT00000001490	Tesc	tescalcin	1.18	0.0268
	17740946	NM_001011951	Sf3b4	splicing factor 3b, subunit 4	1.18	0.000106
	17783411	NM_173153	Gimap4	GTPase, IMAP family member 4	1.18	0.015
	17644090	NM_001105766	Pkmyt1	protein kinase, membrane associated tyrosine/threonine 1	1.18	0.0218
	17863707	ENSRNOT00000064273 // ENSRNOT00000064273	Ptpn18 // Ptpn18	protein tyrosine phosphatase, non-receptor type 18 // protein tyrosine phosphatase, non-receptor type 18	1.18	0.014
	17665608	ENSRNOT00000033595 // ENSRNOT00000033595	LOC685680 // LOC683549	similar to TPA-induced transmembrane protein // similar to TPA-induced transmembrane protein	1.18	0.0276
	17733179	NM_001024257	Cenpt	centromere protein T	1.18	0.0456
	17847480	NM_001109297	Tusc2	tumor suppressor candidate 2	1.18	0.0184
	17769299	NM_001108964	Spo11	SPO11 meiotic protein covalently bound to DSB homolog (S, cerevisiae)	1.18	0.00942
	17624043	NM_001014164	Cybasc3	cytochrome b, ascorbate dependent 3	1.18	0.0406
	17815072	ENSRNOT00000000231	Klf11	Kruppel-like factor 11	1.18	0.0185
	17775079	---	---	---	1.18	0.0108
	17778693	NM_001256465	Cpne1	copine I	1.18	0.0247
	17829401	ENSRNOT00000049001 // ENSRNOT00000049001 // ENSRNOT00000049001 // ENSRNOT00000049001	LOC100364712 // LOC100360975 // LOC100360868 // LOC686736	histone H3,3B-like // histone H3,3B-like // histone H3,3B-like // similar to H3 histone, family 3B	1.18	0.0182
	17791133	NM_001134979	Ezh2	enhancer of zeste homolog 2 (Drosophila)	1.18	0.0178
	17830829	---	---	---	1.18	0.017
	17747402	NM_001044263	Rfxap	regulatory factor X-associated protein	1.18	0.000963
	17619214	NM_001001034	Olr199	olfactory receptor 199	1.18	0.025
	17651192	NM_145778	Tubg1	tubulin, gamma 1	1.18	0.00347
	17807085	NM_001107934	Trim14	tripartite motif-containing 14	1.18	0.0177
	17878735	NM_080410	Sytl4	synaptotagmin-like 4	1.18	0.0342
	17833139	NM_001000055	Olr880	olfactory receptor 880	1.18	0.0119
	17837066	---	---	---	1.18	0.0298
	17778866	NM_001191066	Rbl1	retinoblastoma-like 1 (p107)	1.18	0.0422
	17706847	ENSRNOT00000023065	Ankrd41	ankyrin repeat domain 41	1.18	0.0355
	17876049	ENSRNOT00000004305	Mid1ip1	MID1 interacting protein 1 (gastrulation specific G12 homolog (zebrafish))	1.18	0.0123
	17839351	NM_001244855	Rangap1	RAN GTPase activating protein 1	1.18	0.0187
	17676030	NM_001017485	LOC498145	similar to RIKEN cDNA 2810453I06	1.18	0.0435
	17656034	---	---	---	1.18	0.0361
	17743406	NM_175597	Ssx2ip	synovial sarcoma, X breakpoint 2 interacting protein	1.18	0.0138
	17611631	AJ440711	Arid1b	AT rich interactive domain 1B (Swi1 like)	1.18	0.00826
	17699924	NM_001025279	Reep4	receptor accessory protein 4	1.18	0.00534
	17620368	ENSRNOT00000025629	Plk1	polo-like kinase 1	1.18	0.0499
	17748330	ENSRNOT00000031179	Mnd1	meiotic nuclear divisions 1 homolog (S, cerevisiae)	1.18	0.0111
	17616124	ENSRNOT00000027260	Atf5	activating transcription factor 5	1.18	5.3e-05
	17637777	NM_001107556	Fam53b	family with sequence similarity 53, member B	1.18	0.0176
	17860822	NM_001024891	Rhbdd1	rhomboid domain containing 1	1.18	0.0304
	17613570	ENSRNOT00000002044	Napa	N-ethylmaleimide-sensitive factor attachment protein, alpha	1.18	0.00812
	17637237	NM_130411	Coro1a	coronin, actin binding protein 1A	1.18	0.039
	17808407	ENSRNOT00000016130	Psip1	PC4 and SFRS1 interacting protein 1	1.18	0.021
	17839383	NM_001127295	Polr3h	polymerase (RNA) III (DNA directed) polypeptide H	1.18	0.00596
	17646620	NM_001025749	Grap	GRB2-related adaptor protein	1.18	0.0101
	17768760	NM_001107800	Stk4	serine/threonine kinase 4	1.17	0.0142
	17674844	---	---	---	1.17	0.0284
	17795941	ENSRNOT00000007402	Wbp11	WW domain binding protein 11	1.17	0.00854
	17639761	NM_001108516	Dpf2	D4, zinc and double PHD fingers family 2	1.17	0.0003
	17693801	NM_133423	Ythdc1	YTH domain containing 1	1.17	0.00129
	17827071	ENSRNOT00000049194	RGD1563259	similar to hypothetical protein 4930509O22	1.17	0.0471
	17784918	---	---	---	1.17	0.047
	17869888	XM_576815	Cbx4	chromobox homolog 4	1.17	0.0312
	17755175	---	---	---	1.17	0.0283
	17636900	NM_001191603	Palb2	partner and localizer of BRCA2	1.17	0.0239
	17794008	BC158892 // BC158892 // BC158892	Mbd4 // Mbd4 // Mbd4	methyl-CpG binding domain protein 4 // methyl-CpG binding domain protein 4 // methyl-CpG binding domain protein 4	1.17	0.0126
	17814060	---	---	---	1.17	0.0407
	17866714	NM_001106925	Dtymk	deoxythymidylate kinase (thymidylate kinase)	1.17	0.0162
	17806681	XM_002729464	LOC100361292	hypothetical protein LOC100361292	1.17	0.00469
	17804303	---	---	---	1.17	0.0196
	17789520	NR_032105	Mir489	microRNA mir-489	1.17	0.0216
	17618236	NM_022282	Dlg2	discs, large homolog 2 (Drosophila)	1.17	0.00849
	17632871	ENSRNOT00000028217	Ruvbl2	RuvB-like 2 (E, coli)	1.17	0.00321
	17787484	ENSRNOT00000008003	Foxm1	forkhead box M1	1.17	0.0405
	17756682	NM_001003974	Gpsm3	G-protein signaling modulator 3	1.17	0.0328
	17717074	NM_001004257	Hspa14	heat shock protein 14	1.17	0.0378
	17672018	---	---	---	1.17	0.00749
	17806235	---	---	---	1.17	0.0329
	17839239	NM_199117	Cbx7	chromobox homolog 7	1.17	0.00215
	17681760	---	---	---	1.17	0.0497
	17670810	NM_001008284	Crkl	v-crk sarcoma virus CT10 oncogene homolog (avian)-like	1.17	0.000301
	17782997	NM_022522	Casp2	caspase 2	1.17	0.0158
	17755065	---	---	---	1.17	0.00729
	17836586	NM_021680	Nxph4	neurexophilin 4	1.17	0.00703
	17643839	ENSRNOT00000033695	Fam100a	family with sequence similarity 100, member A	1.17	0.00683
	17759513	NM_001008838	RT1-CE15	RT1 class I, locus CE15	1.17	0.0189
	17623235	NM_001100739	Syvn1	synovial apoptosis inhibitor 1, synoviolin	1.17	0.0116
	17829860	XM_001072997	Dennd3	DENN/MADD domain containing 3	1.17	0.0441
	17795358	NM_001177689	Clec2e	C-type lectin domain family 2, member E	1.17	0.012
	17739677	NM_053707	Hdgf	hepatoma-derived growth factor	1.17	0.0405
	17800530	ENSRNOT00000011408	Ssbp3	single stranded DNA binding protein 3	1.17	0.0359
	17846607	ENSRNOT00000010765	Plscr4	phospholipid scramblase 4	1.17	0.0418
	17831637	NM_001024877	Ncaph2	non-SMC condensin II complex, subunit H2	1.17	0.0115
	17880271	---	---	---	1.17	0.0371
	17818232	NM_001012194	Vrk1	vaccinia related kinase 1	1.17	0.0406
	17695125	NM_001033894	Jakmip1	janus kinase and microtubule interacting protein 1	1.17	0.00696
	17869318	XM_343671	Chaf1a	chromatin assembly factor 1, subunit A (p150)	1.17	0.0211
	17752300	---	---	---	1.17	0.0347
	17704506	NM_017045	Rb1	retinoblastoma 1	1.17	0.0209
	17737085	---	---	---	1.17	0.0302
	17621982	---	---	---	1.17	0.00327
	17703968	NM_080888	Bnip3l	BCL2/adenovirus E1B interacting protein 3-like	1.17	0.0348
	17842300	NM_001048243	Ubl5	ubiquitin-like 5	1.17	0.000537
	17683998	ENSRNOT00000006106	Il24	interleukin 24	1.17	0.042
	17756981	NM_033098	Tapbp	TAP binding protein (tapasin)	1.17	0.0108
	17749688	---	---	---	1.17	0.00344
	17827781	NM_017258	Btg1	B-cell translocation gene 1, anti-proliferative	1.17	0.00264
	17771738	NM_001000825	Olr418	olfactory receptor 418	1.17	0.036
	17676301	NM_145673	Mafk	v-maf musculoaponeurotic fibrosarcoma oncogene homolog K (avian)	1.17	0.0349
	17785631	NM_001109250	Kbtbd8	kelch repeat and BTB (POZ) domain containing 8	1.17	0.0359
	17740971	NM_001111341	Hist2h2ab	histone cluster 2, H2ab	1.17	0.0469
	17619011	NM_001108496	Stim1	stromal interaction molecule 1	1.17	0.0237
	17631735	NM_001107503	Cd22	CD22 molecule	1.17	0.0224
	17671099	NM_001135760	Hira	HIR histone cell cycle regulation defective homolog A (S, cerevisiae)	1.17	0.00383
	17821143	NM_001012111	Lpin1	lipin 1	1.17	0.0152
	17783963	NM_001108631	Herc3	hect domain and RLD 3	1.17	0.0271
	17850083	NM_001025700	Fbxl12	F-box and leucine-rich repeat protein 12	1.17	0.00692
	17877202	NM_001190994	Phka2	phosphorylase kinase, alpha 2	1.17	0.0278
	17755165	NM_001106389	Asf1a	ASF1 anti-silencing function 1 homolog A (S, cerevisiae)	1.17	0.0357
	17783064	---	---	---	1.17	0.0123
	17725646	NM_001136151	Nrg2	neuregulin 2	1.17	0.0477
	17673693	NM_001107139	Pitpnm2	phosphatidylinositol transfer protein, membrane-associated 2	1.17	0.0158
	17629124	NM_001009525	Vom1r26	vomeronasal 1 receptor 26	1.17	0.015
	17836571	NM_001008322	Shmt2	serine hydroxymethyltransferase 2 (mitochondrial)	1.17	3.18e-05
	17879316	---	---	---	1.17	0.0134
	17727476	---	---	---	1.17	0.0172
	17710680	NM_001024971	Haus8	HAUS augmin-like complex, subunit 8	1.17	0.0383
	17656770	---	---	---	1.17	0.0293
	17629135	---	---	---	1.17	0.0376
	17872069	NM_012634	Prps2	phosphoribosyl pyrophosphate synthetase 2	1.17	0.0213
	17870609	NM_001173429	2013-09-06	septin 6	1.17	0.0211
	17780696	---	---	---	1.17	0.00744
	17650173	NM_017360	Coil	coilin	1.17	0.00103
	17683912	NM_022205	Cxcr4	chemokine (C-X-C motif) receptor 4	1.17	0.00948
	17851432	NM_001191792	Ubash3b	ubiquitin associated and SH3 domain containing, B	1.17	0.00595
	17843245	---	---	---	1.17	0.0367
	17683403	NM_001106305	Rnf152	ring finger protein 152	1.17	0.00451
	17781889	NM_053967	Spam1	sperm adhesion molecule 1 (PH-20 hyaluronidase, zona pellucida binding)	1.17	0.00703
	17775493	NM_001168524	Arhgap11a	Rho GTPase activating protein 11A	1.17	0.0482
	17672117	NM_001109387	Mad1l1	MAD1 mitotic arrest deficient-like 1 (yeast)	1.17	0.0151
	17841394	NM_001008802	Krt1	keratin 1	1.17	0.00224
	17806462	NM_057195	Smu1	smu-1 suppressor of mec-8 and unc-52 homolog (C, elegans)	1.16	0.0327
	17636452	NM_001144861	Plekha7	pleckstrin homology domain containing, family A member 7	1.16	0.0179
	17710218	---	---	---	1.16	0.0359
	17696032	NM_001013050	Pold2	polymerase (DNA directed), delta 2, regulatory subunit	1.16	0.0343
	17654132	NM_024384	Thoc6	THO complex 6 homolog (Drosophila)	1.16	0.00218
	17675296	NM_001107115	Arhgef18	rho/rac guanine nucleotide exchange factor (GEF) 18	1.16	0.0289
	17674554	NM_001134413	Gltp	glycolipid transfer protein	1.16	0.00314
	17790474	NM_001106590	Slc35b4	solute carrier family 35, member B4	1.16	0.00604
	17664047	NM_001107073	Sirt7	sirtuin 7 (silent mating type information regulation 2, homolog) 7 (S, cerevisiae)	1.16	0.00672
	17639871	NM_001024752	Snx15	sorting nexin 15	1.16	0.0095
	17753078	NM_001109025	Rnf5	ring finger protein 5	1.16	0.00376
	17658981	NM_001025412	Fam58b	family with sequence similarity 58, member B	1.16	0.0219
	17720378	---	---	---	1.16	0.00537
	17813952	XM_002729597	LOC100360342	rCG61559-like	1.16	0.0127
	17826511	NM_001109614	Polr2e	polymerase (RNA) II (DNA directed) polypeptide E	1.16	0.003
	17762531	---	---	---	1.16	0.0321
	17824734	XM_003754248	LOC100360782	mCG114411-like	1.16	0.0163
	17653649	XM_573037	RGD1563163	similar to hypothetical protein MGC24665	1.16	0.0438
	17700290	NM_053520	Elf1	E74-like factor 1	1.16	0.00659
	17684035	---	---	---	1.16	0.022
	17844871	---	---	---	1.16	0.0435
	17670946	---	---	---	1.16	0.0499
	17618702	NM_001191602	C2cd3	C2 calcium-dependent domain containing 3	1.16	0.0438
	17855776	NM_020080	Ndufaf3	NADH dehydrogenase (ubiquinone) 1 alpha subcomplex, assembly factor 3	1.16	0.00464
	17705426	NM_001079710	Gpr18	G protein-coupled receptor 18	1.16	0.0448
	17620772	NM_001025001	LOC308990	hypothetical protein LOC308990	1.16	0.00106
	17637346	NM_001013901	RGD1305592	similar to RIKEN cDNA 2900092E17	1.16	0.00297
	17846083	NM_134382	Elovl5	ELOVL fatty acid elongase 5	1.16	0.00052
	17821442	NM_001108018	Cbll1	Cas-Br-M (murine) ecotropic retroviral transforming sequence-like 1	1.16	2.96e-06
	17694311	NM_001191935	Grxcr1	glutaredoxin, cysteine rich 1	1.16	0.0158
	17830117	NM_001014085	Maf1	MAF1 homolog (S, cerevisiae)	1.16	0.00226
	17810057	NM_001000411	Olr866	olfactory receptor 866	1.16	0.043
	17758582	NM_020074	Srgn	serglycin	1.16	0.0267
	17790472	---	---	---	1.16	0.0295
	17707669	---	---	---	1.16	0.0348
	17659777	NM_001108287	Prr11	proline rich 11	1.16	0.044
	17645478	BC166832	RGD1564036	similar to RIKEN cDNA 3010026O09	1.16	0.0106
	17845202	NM_001108768	Pdcd7	programmed cell death 7	1.16	0.0218
	17623160	XM_003753380	RGD1562657	similar to hypothetical protein DKFZp761E198	1.16	0.00314
	17811373	NM_001107984	Pdik1l	PDLIM1 interacting kinase 1 like	1.16	0.016
	17802720	NM_001107908	Wdtc1	WD and tetratricopeptide repeats 1	1.16	0.0229
	17774212	---	---	---	1.16	0.0494
	17768712	NM_001106537	Ttpal	tocopherol (alpha) transfer protein-like	1.16	0.0241
	17801290	NM_001025656	Ccdc163	coiled-coil domain containing 163	1.16	0.00632
	17868134	ENSRNOT00000041850 // ENSRNOT00000041850 // ENSRNOT00000041850 // ENSRNOT00000041850 // ENSRNOT00000041850 // ENSRNOT00000041850 // ENSRNOT00000041850 // ENSRNOT00000041850 // ENSRNOT00000041850 // ENSRNOT00000041850 // ENSRNOT00000041850 // ENSRNOT00000041850 // ENSRNOT00000041850 // ENSRNOT00000041850 // ENSRNOT00000041850 // ENSRNOT00000041850 // ENSRNOT00000041850 // ENSRNOT00000041850 // ENS…	LOC100364306 // LOC691410 // LOC691403 // LOC690867 // LOC690626 // LOC690523 // LOC690439 // LOC690281 // LOC690122 // LOC690010 // LOC689948 // LOC689905 // LOC689837 // LOC689667 // LOC689658 // LOC688732 // LOC688587 // LOC688428 // LOC687062 // LOC686719 // LOC686131 // LOC686017 // LOC685989 // LOC685966 // LOC685853 // LOC680748 // LOC680198 // LOC501349 // LOC501299 // LOC100364306 // LOC…	hypothetical protein LOC100364306 // similar to Discs large homolog 5 (Placenta and prostate DLG) (Discs large protein P-dlg) // hypothetical protein LOC691403 // similar to Discs large homolog 5 (Placenta and prostate DLG) (Discs large protein P-dlg) // hypothetical protein LOC690626 // hypothetical protein LOC690523 // similar to spermatogenesis associated glutamate (E)-rich protein 4d // simil…	1.16	0.0451
	17697585	NM_021774	Fhit	fragile histidine triad gene	1.16	0.0266
	17802685	NM_001010966	Pigv	phosphatidylinositol glycan anchor biosynthesis, class V	1.16	0.00555
	17673871	ENSRNOT00000064390	LOC690130	similar to ras homolog gene family, member f	1.16	0.0217
	17774721	NM_031797	Cd82	Cd82 molecule	1.16	0.0195
	17805262	NM_001012464	Terf1	telomeric repeat binding factor (NIMA-interacting) 1	1.16	0.0333
	17812486	ENSRNOT00000035695	Miip	migration and invasion inhibitory protein	1.16	0.00604
	17878691	NM_001106966 // NM_001106966 // NM_001106966	RGD1562485 // RGD1562485 // RGD1562485	similar to RIKEN cDNA 4921511C20 gene // similar to RIKEN cDNA 4921511C20 gene // similar to RIKEN cDNA 4921511C20 gene	1.16	0.0333
	17620684	NM_001135698	Ypel3	yippee-like 3 (Drosophila)	1.16	0.00378
	17854739	ENSRNOT00000013209	Pls1	plastin 1	1.16	0.0188
	17619153	---	---	---	1.16	0.0441
	17653601	---	---	---	1.16	0.0439
	17672113	NM_001107125	Ftsj2	FtsJ homolog 2 (E, coli)	1.16	0.0138
	17829199	---	---	---	1.16	0.0147
	17831286	NM_001012121	Prr5	proline rich 5 (renal)	1.16	0.0176
	17838576	NM_031153	Sharpin	SHANK-associated RH domain interactor	1.16	4.93e-05
	17782871	---	---	---	1.16	0.0472
	17850819	NM_001017381	Fli1	Friend leukemia virus integration 1	1.16	0.00386
	17839195	FQ224496	Sun2	Sad1 and UNC84 domain containing 2	1.16	0.0387
	17661515	---	---	---	1.16	0.0438
	17841243	---	---	---	1.16	0.0498
	17833071	NM_080787	Dgka	diacylglycerol kinase, alpha	1.16	0.00217
	17843065	HQ840742	LOC100362690	rCG64164-like	1.16	0.0328
	17877395	XM_001055437	Klhl34	kelch-like 34 (Drosophila)	1.16	0.0199
	17629929	---	---	---	1.16	0.00397
	17645748	---	---	---	1.16	0.00446
	17863936	NM_001160155	Mgat4a	mannosyl (alpha-1,3-)-glycoprotein beta-1,4-N-acetylglucosaminyltransferase, isozyme A	1.16	0.0499
	17613961	NM_001025642	Fbxo46	F-box protein 46	1.16	4.92e-05
	17867125	ENSRNOT00000021534	Tgif1	TGFB-induced factor homeobox 1	1.16	0.00159
	17671398	---	---	---	1.16	0.035
	17860569	NM_001014219	Ankzf1	ankyrin repeat and zinc finger domain containing 1	1.16	0.000113
	17851651	NM_001113748	Rnf26	ring finger protein 26	1.16	0.00541
	17699970	ENSRNOT00000019222	Gfra2	GDNF family receptor alpha 2	1.16	0.0488
	17769271	BC101880	RGD1311072	similar to 2410001C21Rik protein	1.16	0.0119
	17831400	NM_001130499	Ttc38	tetratricopeptide repeat domain 38	1.16	0.0112
	17871287	ENSRNOT00000003954	Ccnb3	cyclin B3	1.16	0.0146
	17874772	NM_001109322	Ctag2	cancer/testis antigen 2	1.16	0.0153
	17877587	---	---	---	1.16	0.0495
	17857535	NM_001108204	Polh	polymerase (DNA directed), eta	1.16	0.0265
	17874495	---	---	---	1.16	0.0146
	17811636	NM_001008524	C1qc	complement component 1, q subcomponent, C chain	1.16	0.00112
	17821712	---	---	---	1.16	0.0114
	17731644	ENSRNOT00000043039	Cpne2	copine II	1.16	0.0249
	17725751	NM_001108428	RGD1563159	RGD1563159	1.16	0.0262
	17659280	NM_001004068	Rffl	ring finger and FYVE-like domain containing 1	1.16	0.0191
	17833370	ENSRNOT00000068773	Aes	amino-terminal enhancer of split	1.16	3.16e-05
	17622231	NR_045202	Tmem80	transmembrane protein 80	1.16	0.00118
	17709862	---	---	---	1.16	0.0494
	17756992	NM_080891	Daxx	death-domain associated protein	1.16	0.000921
	17636305	---	---	---	1.16	0.0118
	17811098	NM_057133	Nr0b2	nuclear receptor subfamily 0, group B, member 2	1.16	0.0376
	17841996	NM_001007660	Ccdc82	coiled-coil domain containing 82	1.15	0.0483
	17729478	---	---	---	1.15	0.013
	17846255	---	---	---	1.15	0.00894
	17731681	NM_053523	Herpud1	homocysteine-inducible, endoplasmic reticulum stress-inducible, ubiquitin-like domain member 1	1.15	0.000751
	17862095	---	---	---	1.15	0.0297
	17717178	XM_001057551	Tmem236	transmembrane protein 236	1.15	0.0168
	17665020	---	---	---	1.15	0.0445
	17774770	NM_001109594	Accsl	1-aminocyclopropane-1-carboxylate synthase homolog (Arabidopsis)(non-functional)-like	1.15	0.0084
	17872516	XM_002730241	LOC100362173	rCG36365-like	1.15	0.00934
	17819714	NM_001039035	Srsf7	serine/arginine-rich splicing factor 7	1.15	0.0153
	17849078	NM_001170577	Zfp167	zinc finger protein 167	1.15	0.00131
	17870273	ENSRNOT00000041850 // ENSRNOT00000041850 // ENSRNOT00000041850 // ENSRNOT00000041850 // ENSRNOT00000041850 // ENSRNOT00000041850 // ENSRNOT00000041850 // ENSRNOT00000041850 // ENSRNOT00000041850 // ENSRNOT00000041850 // ENSRNOT00000041850 // ENSRNOT00000041850 // ENSRNOT00000041850 // ENSRNOT00000041850 // ENSRNOT00000041850 // ENSRNOT00000041850 // ENSRNOT00000041850 // ENSRNOT00000041850 // ENS…	LOC100364306 // LOC691410 // LOC691403 // LOC690867 // LOC690626 // LOC690523 // LOC690439 // LOC690281 // LOC690122 // LOC690010 // LOC689948 // LOC689905 // LOC689837 // LOC689667 // LOC689658 // LOC688732 // LOC688587 // LOC688428 // LOC687062 // LOC686719 // LOC686131 // LOC686017 // LOC685989 // LOC685966 // LOC685853 // LOC680748 // LOC680198 // LOC501349 // LOC501299 // LOC100364306 // LOC…	hypothetical protein LOC100364306 // similar to Discs large homolog 5 (Placenta and prostate DLG) (Discs large protein P-dlg) // hypothetical protein LOC691403 // similar to Discs large homolog 5 (Placenta and prostate DLG) (Discs large protein P-dlg) // hypothetical protein LOC690626 // hypothetical protein LOC690523 // similar to spermatogenesis associated glutamate (E)-rich protein 4d // simil…	1.15	0.0336
	17863651	NM_001024762	Prim2	primase, DNA, polypeptide 2	1.15	0.0369
	17733868	ENSRNOT00000018795	Hsd17b2	hydroxysteroid (17-beta) dehydrogenase 2	1.15	0.00188
	17854322	NM_001007020	Hmgn3	high mobility group nucleosomal binding domain 3	1.15	0.003
	17703311	---	---	---	1.15	0.0127
	17616728	NM_138529	Nav2	neuron navigator 2	1.15	0.00956
	17625804	---	---	---	1.15	0.0102
	17665319	---	---	---	1.15	0.00188
	17672853	NM_001170403	Orai2	ORAI calcium release-activated calcium modulator 2	1.15	0.00818
	17799942	---	---	---	1.15	0.00839
	17782382	ENSRNOT00000030090	Agbl3	ATP/GTP binding protein-like 3	1.15	0.0219
	17639720	NM_001109537	Sssca1	Sjogren syndrome/scleroderma autoantigen 1 homolog (human)	1.15	0.0117
	17761948	NM_001037767	Arpc5l	actin related protein 2/3 complex, subunit 5-like	1.15	0.0325
	17627455	NM_001037789	Ccdc28a	coiled-coil domain containing 28A	1.15	0.00403
	17733876	NM_017168 // NM_017168 // NM_017168	Plcg2 // Plcg2 // Plcg2	phospholipase C, gamma 2 // phospholipase C, gamma 2 // phospholipase C, gamma 2	1.15	0.0351
	17722425	NM_001007628	Cxxc5	CXXC finger protein 5	1.15	0.00631
	17682600	---	---	---	1.15	0.0381
	17678857	NM_001107153	Usp30	ubiquitin specific peptidase 30	1.15	0.0348
	17834425	NM_032617	Rab11b	RAB11B, member RAS oncogene family	1.15	0.000643
	17774138	NM_001000310	Olr495	olfactory receptor 495	1.15	0.0317
	17693342	NM_001013988	Stbd1	starch binding domain 1	1.15	0.0212
	17632113	NM_001135835	Dpy19l3	dpy-19-like 3 (C, elegans)	1.15	0.0381
	17869622	---	---	---	1.15	0.0273
	17758264	NM_001012463 // NM_001012463 // NM_001012463	Taf9 // Taf9 // Taf9	TAF9 RNA polymerase II, TATA box binding protein (TBP)-associated factor // TAF9 RNA polymerase II, TATA box binding protein (TBP)-associated factor // TAF9 RNA polymerase II, TATA box binding protein (TBP)-associated factor	1.15	0.00416
	17635902	NM_001000192	Olr204	olfactory receptor 204	1.15	0.00421
	17644720	BC100622	RGD1307155	similar to CG18661-PA	1.15	0.0103
	17798263	---	---	---	1.15	0.011
	17781998	---	---	---	1.15	0.0488
	17713951	AF456459 // AF456459	Ctsr // Ctsr	cathepsin R // cathepsin R	1.15	0.0392
	17759936	ENSRNOT00000037169	Fut7	fucosyltransferase 7 (alpha (1,3) fucosyltransferase)	1.15	0.0128
	17707931	BC086510	Snx25	sorting nexin 25	1.15	0.00888
	17748071	---	---	---	1.15	0.0356
	17766447	NM_001106513	Pank2	pantothenate kinase 2 (Hallervorden-Spatz syndrome)	1.15	0.0283
	17759068	---	---	---	1.15	0.0063
	17812817	NM_001108978	Pik3cd	phosphoinositide-3-kinase, catalytic, delta polypeptide	1.15	0.00052
	17681890	ENSRNOT00000005147	Dedd	death effector domain-containing	1.15	0.000224
	17828988	NM_001012116	Spag1	sperm associated antigen 1	1.15	0.0161
	17790083	NM_001024322	Pot1	protection of telomeres 1 homolog (S, pombe)	1.15	0.0235
	17827537	NM_001108082	Cdk17	cyclin-dependent kinase 17	1.15	0.0128
	17693820	NM_001025115	Stap1	signal transducing adaptor family member 1	1.15	0.0197
	17707836	NM_001014000	Cdkn2aip	CDKN2A interacting protein	1.15	0.0211
	17801498	BC100622 // BC100622 // BC100622	RGD1307155 // RGD1307155 // RGD1307155	similar to CG18661-PA // similar to CG18661-PA // similar to CG18661-PA	1.15	0.000304
	17876808	ENSRNOT00000003397	Gnl3l	guanine nucleotide binding protein-like 3 (nucleolar)-like	1.15	0.00911
	17874015	ENSRNOT00000004252	LOC100361182	armadillo repeat containing, X-linked 5	1.15	0.049
	17811503	ENSRNOT00000068004	Nipal3	NIPA-like domain containing 3	1.15	0.00209
	17733315	---	---	---	1.15	0.0219
	17630609	ENSRNOT00000041651	Pou2f2	POU class 2 homeobox 2	1.15	0.0462
	17755590	---	---	---	1.15	0.0401
	17766437	NM_001005556	Mavs	mitochondrial antiviral signaling protein	1.15	0.000622
	17757656	NM_017299	Slc19a1	solute carrier family 19 (folate transporter), member 1	1.15	0.0262
	17826196	ENSRNOT00000022336	Lmnb2	lamin B2	1.15	0.0259
	17649582	XM_003752356	LOC689039	hypothetical protein LOC689039	1.15	0.0343
	17783045	NM_053761	Zyx	zyxin	1.15	0.0218
	17684677	NM_001109499 // NM_001109499 // NM_001109499	Wbscr27 // Wbscr27 // Wbscr27	Williams Beuren syndrome chromosome region 27 // Williams Beuren syndrome chromosome region 27 // Williams Beuren syndrome chromosome region 27	1.15	0.00828
	17690891	---	---	---	1.15	0.0198
	17704254	NM_001007622	Pdlim2	PDZ and LIM domain 2	1.15	0.00344
	17706836	NM_001006964	Babam1	BRISC and BRCA1 A complex member 1	1.15	0.000163
	17799707	NM_001107943	Acer2	alkaline ceramidase 2	1.15	0.0389
	17704121	NM_001106046	Adamdec1	ADAM-like, decysin 1	1.15	0.0482
	17728927	NM_138549	Tecr	trans-2,3-enoyl-CoA reductase	1.15	0.0012
	17771452	ENSRNOT00000045724 // ENSRNOT00000045724	LOC100365556 // LOC100361774	Ral GEF with PH domain and SH3 binding motif 1-like // Ral GEF with PH domain and SH3 binding motif 1	1.15	0.0248
	17697914	ENSRNOT00000013912	Cgrrf1	cell growth regulator with ring finger domain 1	1.15	0.0118
	17715465	NM_001137626 // NM_001137626 // NM_001137626	E2f3 // E2f3 // E2f3	E2F transcription factor 3 // E2F transcription factor 3 // E2F transcription factor 3	1.15	0.0453
	17743164	FQ221477	LOC685067	similar to guanylate binding protein family, member 6	1.15	0.0182
	17822054	---	---	---	1.15	0.00596
	17669340	NM_001009177	Stfa3l1	stefin A3-like 1	1.15	0.0327
	17786505	XM_001057512	Dcp1b	DCP1 decapping enzyme homolog b (S, cerevisiae)	1.15	0.00018
	17807023	NM_001024785	Mcart1	mitochondrial carrier triple repeat 1	1.15	0.0163
	17620262	XM_001078789	LOC691551	similar to F28B3,5a	1.15	0.0478
	17629093	ENSRNOT00000015520 // ENSRNOT00000015520	Zfp40 // Zfp40	zinc finger protein 40 // zinc finger protein 40	1.15	0.0436
	17729616	NM_001106181	Dus2l	dihydrouridine synthase 2-like, SMM1 homolog (S, cerevisiae)	1.15	0.00925
	17707649	---	---	---	1.15	0.0255
	17642625	NM_001013154	Pcgf6	polycomb group ring finger 6	1.15	0.000161
	17725465	NM_001008509	Brd8	bromodomain containing 8	1.15	0.018
	17852970	NM_001030039	Csk	c-src tyrosine kinase	1.15	0.00422
	17749403	ENSRNOT00000028661	Gabpb2	GA binding protein transcription factor, beta subunit 2	1.15	0.0143
	17696521	---	---	---	1.15	0.0249
	17740327	ENSRNOT00000049810	Dennd4b	DENN/MADD domain containing 4B	1.15	0.00216
	17833143	---	---	---	1.15	0.0155
	17825861	---	---	---	1.15	0.0155
	17652143	BC083806	Tex2	testis expressed 2	1.15	0.0446
	17803076	NM_001164143	Cnr2	cannabinoid receptor 2 (macrophage)	1.15	0.0236
	17626869	NM_030829	Grk5	G protein-coupled receptor kinase 5	1.15	0.0448
	17827841	ENSRNOT00000058937	LOC100362836	rCG49027-like	1.15	0.0459
	17714628	ENSRNOT00000015786	Auh	AU RNA binding protein/enoyl-CoA hydratase	1.15	0.00866
	17709559	NM_001106060	Slmap	sarcolemma associated protein	1.15	0.0154
	17836459	NM_080480	Pip4k2c	phosphatidylinositol-5-phosphate 4-kinase, type II, gamma	1.15	0.0257
	17867717	NM_001106873	Slc25a23	solute carrier family 25 (mitochondrial carrier; phosphate carrier), member 23	1.15	0.016
	17624493	---	---	---	1.15	0.0466
	17699518	NM_001037528	Defb43	defensin beta 43	1.15	0.00695
	17806687	NM_001024343	LOC500445	similar to hypothetical protein 4931430D02	1.15	0.0057
	17746462	NM_031080	Pde7a	phosphodiesterase 7A	1.15	0.0303
	17845637	BC092633	RGD1307526	similar to modulator of estrogen induced transcription	1.15	0.0232
	17859645	---	---	---	1.15	0.0371
	17796291	NM_001134581	RGD1304592	similar to KIAA0528 protein	1.15	0.0213
	17816023	NM_001109023	Pnn	pinin, desmosome associated protein	1.15	0.00795
	17640125	NM_001108518	Naa40	N(alpha)-acetyltransferase 40, NatD catalytic subunit, homolog (S, cerevisiae)	1.15	0.0216
	17755365	AJ131848	Col10a1	collagen, type X, alpha 1	1.15	0.0394
	17833751	NM_001008525	Ndufs7	NADH dehydrogenase (ubiquinone) Fe-S protein 7	1.15	0.00887
	17753648	NM_001047907	Srsf3	serine/arginine-rich splicing factor 3	1.14	0.0184
	17729466	NM_031824	Ctcf	CCCTC-binding factor (zinc finger protein)	1.14	0.0135
	17615395	NM_001134610	Igflr1	IGF-like family receptor 1	1.14	0.00427
	17808237	---	---	---	1.14	0.0323
	17842418	NM_001134715	Slc44a2	solute carrier family 44, member 2	1.14	0.0042
	17756437	NM_001001969	Ly6g6c	lymphocyte antigen 6 complex, locus G6C	1.14	0.0453
	17658765	NM_017188	Unc119	UNC-119 homolog (C, elegans)	1.14	0.0464
	17635507	NM_001037195	Rhog	ras homolog gene family, member G (rho G)	1.14	0.00231
	17645125	NM_001127296	Pwwp2a	PWWP domain containing 2A	1.14	0.00839
	17785409	NM_001109489	LOC685964	hypothetical protein LOC685964	1.14	0.00138
	17698585	BC099216	RGD1311300	similar to T cell receptor V delta 6	1.14	0.0105
	17708069	---	---	---	1.14	0.0171
	17708236	NM_001014143	Eri1	exoribonuclease 1	1.14	0.0261
	17612778	NM_001106218	Leng1	leukocyte receptor cluster (LRC) member 1	1.14	0.0132
	17679275	---	---	---	1.14	0.0242
	17626240	ENSRNOT00000027417	Ina	internexin neuronal intermediate filament protein, alpha	1.14	0.00834
	17702243	---	---	---	1.14	0.041
	17635065	ENSRNOT00000019370	Capn5	calpain 5	1.14	0.0481
	17613364	ENSRNOT00000026305 // ENSRNOT00000026305	LOC100364437 // LOC100360280	zinc finger and SCAN domain containing 22-like // zinc finger and SCAN domain containing 22-like	1.14	0.00878
	17844940	NM_134398	Aagab	alpha- and gamma-adaptin binding protein	1.14	0.00154
	17820496	NM_013065	Ppp1cb	protein phosphatase 1, catalytic subunit, beta isozyme	1.14	0.00658
	17880086	ENSRNOT00000056282	Emd	emerin	1.14	0.0343
	17785314	NM_147177	Ruvbl1	RuvB-like 1 (E, coli)	1.14	0.0132
	17756409	NM_212531	Abhd16a	abhydrolase domain containing 16A	1.14	0.0082
	17842358	NM_001108754	Mrpl4	mitochondrial ribosomal protein L4	1.14	0.00664
	17717973	NM_001037362	MGC125086	similar to RIKEN cDNA 5133401N09	1.14	0.0102
	17610330	ENSRNOT00000051591 // ENSRNOT00000051591	LOC682996 // Vom2r2	similar to vomeronasal 2, receptor, 1 // vomeronasal 2 receptor, 2	1.14	0.0349
	17710079	NM_054011	Sh3bp5	SH3-domain binding protein 5 (BTK-associated)	1.14	0.00194
	17863097	---	---	---	1.14	0.0135
	17850177	ENSRNOT00000067325	Dnmt1	DNA (cytosine-5-)-methyltransferase 1	1.14	0.0319
	17704152	---	---	---	1.14	0.0482
	17810834	NM_001100709	Lck	lymphocyte-specific protein tyrosine kinase	1.14	0.0342
	17643588	NM_001109026	Dexi	dexamethasone-induced transcript	1.14	0.0077
	17672473	XM_002724795	LOC680923	similar to paired immunoglobin-like type 2 receptor beta	1.14	0.0398
	17782566	NM_001037795	Fmc1	formation of mitochondrial complexes 1 homolog (S, cerevisiae)	1.14	0.0116
	17651870	---	---	---	1.14	0.00687
	17807058	NM_001106656	Xpa	xeroderma pigmentosum, complementation group A	1.14	0.0156
	17794426	NM_001191752	Ccdc77	coiled-coil domain containing 77	1.14	0.0295
	17641603	NM_001035002	Atad1	ATPase family, AAA domain containing 1	1.14	0.00965
	17708327	---	---	---	1.14	0.0459
	17766248	---	---	---	1.14	0.00609
	17699137	NM_001191685	Rnf17	ring finger protein 17	1.14	0.0378
	17712330	NM_031558	Star	steroidogenic acute regulatory protein	1.14	0.0435
	17718317	NM_001106102	Higd2a	HIG1 hypoxia inducible domain family, member 2A	1.14	0.00567
	17735471	NM_001037310	Taf9	TAF9 RNA polymerase II, TATA box binding protein (TBP)-associated factor	1.14	0.026
	17755836	NM_001109482 // NM_001109482 // NM_001109482	Ubxn2a // Ubxn2a // Ubxn2a	UBX domain protein 2A // UBX domain protein 2A // UBX domain protein 2A	1.14	0.047
	17787996	NM_053441	Slco1c1	solute carrier organic anion transporter family, member 1c1	1.14	0.0064
	17719835	NM_001144851	B3galnt2	beta-1,3-N-acetylgalactosaminyltransferase 2	1.14	0.0119
	17724521	---	---	---	1.14	0.038
	17718397	ENSRNOT00000016942	Syk	spleen tyrosine kinase	1.14	0.00866
	17656515	NM_001107004	Zfp39	zinc finger protein 39	1.14	0.00708
	17795195	NR_027366	MGC94282	similar to 5930416I19Rik protein	1.14	0.00309
	17874901	NM_001191915	Gpr50	G protein-coupled receptor 50	1.14	0.0236
	17654035	NM_001105763	Zfp263	zinc finger protein 263	1.14	0.0267
	17823658	AY445136	Eml5	echinoderm microtubule associated protein like 5	1.14	0.0117
	17784469	NM_031337	St3gal5	ST3 beta-galactoside alpha-2,3-sialyltransferase 5	1.14	0.0075
	17741553	NM_001107709	Ap4b1	adaptor-related protein complex 4, beta 1 subunit	1.14	0.0237
	17670567	NM_181473	Klhl24	kelch-like 24 (Drosophila)	1.14	0.0308
	17677052	NM_001109021 // NM_001109021 // NM_001109021	Bcl7b // Bcl7b // Bcl7b	B-cell CLL/lymphoma 7B // B-cell CLL/lymphoma 7B // B-cell CLL/lymphoma 7B	1.14	0.0038
	17634635	NM_001013149	Mesdc1	mesoderm development candidate 1	1.14	0.000704
	17626445	NM_031583	Smc3	structural maintenance of chromosomes 3	1.14	0.0398
	17615710	---	---	---	1.14	0.0186
	17780281	BC088309	LOC682097	similar to TBP-associated factor 4	1.14	0.00689
	17698473	ENSRNOT00000064258 // ENSRNOT00000064258 // ENSRNOT00000064258	LOC100363214 // LOC100363161 // LOC100361418	hypothetical protein LOC100363214 // hypothetical protein LOC100363161 // hypothetical protein LOC100361418	1.14	0.0449
	17800800	NM_001044288	Kti12	KTI12 homolog, chromatin associated (S, cerevisiae)	1.14	0.0317
	17839580	NM_001135922	Ttll12	tubulin tyrosine ligase-like family, member 12	1.14	0.0109
	17661632	NM_001107051	Ezh1	enhancer of zeste homolog 1 (Drosophila)	1.14	0.0445
	17789982	ENSRNOT00000068404	Cadps2	Ca++-dependent secretion activator 2	1.14	0.0289
	17801708	NM_001109669	Scmh1	sex comb on midleg homolog 1 (Drosophila)	1.14	0.00977
	17841529	NM_001106795	Aaas	achalasia, adrenocortical insufficiency, alacrimia	1.14	0.0166
	17630097	ENSRNOT00000022603 // ENSRNOT00000022603 // ENSRNOT00000022603	Calm2 // Calm3 // Calm1	calmodulin 2 // calmodulin 3 // calmodulin 1	1.14	0.0178
	17829353	ENSRNOT00000006410	Slc30a8	solute carrier family 30 (zinc transporter), member 8	1.14	0.0152
	17772526	XM_575139	Ly75	lymphocyte antigen 75	1.14	0.0414
	17745972	---	---	---	1.14	0.0185
	17778343	NM_001033672	Bcl2l1	Bcl2-like 1	1.14	0.0338
	17838812	NM_173122	Arhgap39	Rho GTPase activating protein 39	1.14	0.00426
	17737508	---	---	---	1.14	0.0426
	17752604	NM_213610	RGD1302996	hypothetical protein MGC:15854	1.14	0.0158
	17775066	NM_001109606	Fbxo3	F-box protein 3	1.14	0.0356
	17652357	NM_053314	Kcnj16	potassium inwardly-rectifying channel, subfamily J, member 16	1.14	0.0274
	17767142	XR_145900	LOC689369	similar to myeloid cell leukemia sequence 1	1.14	0.0436
	17727939	NM_001014014	Nip30	NEFA-interacting nuclear protein NIP30	1.14	0.00371
	17865129	ENSRNOT00000067589	LOC367289	similar to CG4699-PA, isoform A	1.14	0.0124
	17714388	NM_001107336	Dok3	docking protein 3	1.14	0.0301
	17652551	ENSRNOT00000004351	Slc9a3r1	solute carrier family 9 (sodium/hydrogen exchanger), member 3 regulator 1	1.14	0.0194
	17674486	NM_001105934	Unc119b	unc-119 homolog B (C, elegans)	1.14	0.00731
	17627881	NM_001007734	Echdc1	enoyl CoA hydratase domain containing 1	1.14	0.0267
	17803430	ENSRNOT00000020069	Sh2d5	SH2 domain containing 5	1.14	0.0364
	17711153	---	---	---	1.14	0.0296
	17682418	ENSRNOT00000005849	Zfp238	zinc finger protein 238	1.14	0.039
	17870082	---	---	---	1.14	0.0372
	17872232	XM_001067753	Zrsr2	zinc finger (CCCH type), RNA binding motif and serine/arginine rich 2	1.14	0.0172
	17701813	NM_001107258	Atg14	autophagy related 14	1.14	0.00798
	17767562	---	---	---	1.14	0.00399
	17805788	NM_001108656	Ccne2	cyclin E2	1.14	0.0169
	17646243	---	---	---	1.14	0.0448
	17684042	NM_019365	Rassf5	Ras association (RalGDS/AF-6) domain family member 5	1.14	0.0252
	17705614	BC079195 // BC079195 // BC079195	LOC498465 // LOC498465 // LOC498465	similar to RIKEN cDNA 1700001F09 // similar to RIKEN cDNA 1700001F09 // similar to RIKEN cDNA 1700001F09	1.14	0.0428
	17804305	ENSRNOT00000055621	RGD1563533	similar to novel protein	1.14	0.00851
	17777484	ENSRNOT00000028883	Rassf2	Ras association (RalGDS/AF-6) domain family member 2	1.14	0.0301
	17787678	NM_001037353	Etv6	ets variant 6	1.14	0.00226
	17772976	ENSRNOT00000009988	RGD1560831	similar to 40S ribosomal protein S3	1.14	0.045
	17644634	NM_001105774	Rpusd1	RNA pseudouridylate synthase domain containing 1	1.14	0.000588
	17842959	NM_012555	Ets1	v-ets erythroblastosis virus E26 oncogene homolog 1 (avian)	1.14	0.0132
	17809445	ENSRNOT00000013321	Cyp4b1	cytochrome P450, family 4, subfamily b, polypeptide 1	1.14	0.0198
	17727481	XM_001069809	LOC689166	hypothetical protein LOC689166	1.14	0.0475
	17790891	NM_001108625	Prss37	protease, serine, 37	1.14	0.0231
	17646114	---	---	---	1.14	0.0146
	17761503	NM_001108579	Sh2d3c	SH2 domain containing 3C	1.14	0.0428
	17657452	NM_001105791	Pfas	phosphoribosylformylglycinamidine synthase	1.14	0.0325
	17816410	---	---	---	1.14	0.0118
	17811980	NM_199096	Necap2	NECAP endocytosis associated 2	1.14	0.000248
	17850845	ENSRNOT00000013763	Dcps	decapping enzyme, scavenger	1.14	0.00888
	17752548	NM_212544	Prr3	proline rich 3	1.14	0.0388
	17777003	NM_138857	Prom2	prominin 2	1.14	0.0206
	17613636	ENSRNOT00000068268	LOC678741	similar to Zinc finger CCCH-type domain containing protein 6	1.14	0.00729
	17763768	---	---	---	1.14	0.0459
	17831177	---	---	---	1.14	0.0119
	17844970	---	---	---	1.14	0.0119
	17768233	ENSRNOT00000008386	RGD1561343	similar to C20orf118	1.13	0.0264
	17823538	---	---	---	1.13	0.00671
	17857548	NM_001009699	Mad2l1bp	MAD2L1 binding protein	1.13	0.0299
	17764675	NM_001109630	Slc12a6	solute carrier family 12, member 6	1.13	0.0154
	17716833	NM_001013058	Rbm17	RNA binding motif protein 17	1.13	0.045
	17732410	NM_001105946	RGD1564093	similar to RIKEN cDNA 2310036O22	1.13	0.0111
	17875719	NM_001008861	Usp11	ubiquitin specific peptidase 11	1.13	0.00626
	17666640	NM_001012016	Tbccd1	TBCC domain containing 1	1.13	0.00707
	17863206	---	---	---	1.13	0.0283
	17857819	---	---	---	1.13	0.0283
	17641403	---	---	---	1.13	0.0255
	17656106	ENSRNOT00000063772	Rad50	RAD50 homolog (S, cerevisiae)	1.13	0.0191
	17673008	NM_001135743	Wbscr22	Williams Beuren syndrome chromosome region 22	1.13	0.0139
	17714537	ENSRNOT00000060822	Rnf44	ring finger protein 44	1.13	0.00435
	17650038	ENSRNOT00000010755	Bzrap1	benzodiazapine receptor associated protein 1	1.13	0.0454
	17797367	---	---	---	1.13	0.0275
	17769544	NM_031708	Adrm1	adhesion regulating molecule 1	1.13	0.00472
	17665390	NM_017187 // NM_017187 // NM_017187	Hmgb2 // Hmgb2 // Hmgb2	high mobility group box 2 // high mobility group box 2 // high mobility group box 2	1.13	0.0407
	17776616	NM_001013205	Myef2	myelin expression factor 2	1.13	0.00733
	17709986	NM_001033655	Dnah1	dynein, axonemal, heavy chain 1	1.13	0.0354
	17756099	NM_001008849	RT1-M1-2	RT1 class I, locus M1, gene 2	1.13	0.0278
	17715142	---	---	---	1.13	0.0466
	17876182	NM_001108249	Timm17b	translocase of inner mitochondrial membrane 17 homolog B (yeast)	1.13	0.0038
	17651484	NM_176077	G6pc3	glucose 6 phosphatase, catalytic, 3	1.13	0.00985
	17739375	---	---	---	1.13	0.0216
	17831179	NM_001191788	Mcat	malonyl CoA:ACP acyltransferase (mitochondrial)	1.13	0.0469
	17830353	NM_001013175	Apol3	apolipoprotein L, 3	1.13	0.0135
	17799420	ENSRNOT00000058893	LOC683719	similar to RAS and EF hand domain containing	1.13	0.0202
	17857289	NM_001106888	RGD1305680	similar to KIAA0240	1.13	0.0134
	17834498	---	---	---	1.13	0.0112
	17783152	---	---	---	1.13	0.0262
	17724651	NM_001170436	Rttn	rotatin	1.13	0.0432
	17710560	NM_001169127	Tspan14	tetraspanin 14	1.13	0.0115
	17819025	NM_001108725	Zfyve21	zinc finger, FYVE domain containing 21	1.13	0.00706
	17709357	---	---	---	1.13	0.0105
	17802032	NM_001113784	Meaf6	MYST/Esa1-associated factor 6	1.13	7.83e-05
	17879577	XM_001068529	LOC688842	hypothetical protein LOC688842	1.13	0.0305
	17643778	ENSRNOT00000004159	Glyr1	glyoxylate reductase 1 homolog (Arabidopsis)	1.13	0.00886
	17806441	---	---	---	1.13	0.00385
	17630822	NM_030852	Mia	melanoma inhibitory activity	1.13	0.0274
	17671449	NM_001035222	N4bp2l1	NEDD4 binding protein 2-like 1	1.13	0.0194
	17780150	NM_031803	Gmeb2	glucocorticoid modulatory element binding protein 2	1.13	0.00746
	17658044	BC158879	RGD1308134	similar to RIKEN cDNA 1110020A23	1.13	0.0314
	17840944	NM_001044270	Tuba1b	tubulin, alpha 1B	1.13	0.0333
	17634523	---	---	---	1.13	0.0362
	17842094	ENSRNOT00000044945	Gpr83	G protein-coupled receptor 83	1.13	0.0309
	17730703	NM_001106191	Banp	Btg3 associated nuclear protein	1.13	0.0463
	17652634	ENSRNOT00000004843	Armc7	armadillo repeat containing 7	1.13	0.0433
	17757309	ENSRNOT00000068527	Ppil1	peptidylprolyl isomerase (cyclophilin)-like 1	1.13	0.0296
	17870281	---	---	---	1.13	0.0329
	17867711	---	---	---	1.13	0.0329
	17623100	NM_001008305	Eif1ad	eukaryotic translation initiation factor 1A domain containing	1.13	0.00821
	17620528	NM_001037196	Jmjd5	jumonji domain containing 5	1.13	0.0256
	17764796	XM_002729204	RGD1563680	similar to CDNA sequence BC052040	1.13	0.0465
	17780265	NM_012513	Bdnf	brain-derived neurotrophic factor	1.13	0.0128
	17797247	ENSRNOT00000010591	Tp53inp1	tumor protein p53 inducible nuclear protein 1	1.13	0.0108
	17804803	ENSRNOT00000018769	Hes5	hairy and enhancer of split 5 (Drosophila)	1.13	0.0188
	17827530	---	---	---	1.13	0.0176
	17852487	NM_001106821	Atm	ataxia telangiectasia mutated homolog (human)	1.13	0.00942
	17732657	---	---	---	1.13	0.0235
	17762054	NM_001108581	Epc2	enhancer of polycomb homolog 2 (Drosophila)	1.13	0.0105
	17740740	NM_001107695	Vps72	vacuolar protein sorting 72 homolog (S, cerevisiae)	1.13	0.00151
	17808471	FQ230383	Fam29a	family with sequence similarity 29, member A	1.13	0.0381
	17764218	NM_001107749	Tp53i11	tumor protein p53 inducible protein 11	1.13	0.0352
	17811162	ENSRNOT00000056197	LOC100359977	sialomucin core protein 24-like	1.13	0.0361
	17861074	NM_021740	Ptma	prothymosin alpha	1.13	0.0211
	17771520	ENSRNOT00000066961	Gapvd1	GTPase activating protein and VPS9 domains 1	1.13	0.00626
	17620642	NM_001114502	Ccdc101	coiled-coil domain containing 101	1.13	0.0165
	17769726	NM_001009316	Ppdpf	pancreatic progenitor cell differentiation and proliferation factor homolog (zebrafish)	1.13	0.000312
	17802816	NM_001025737	Smpdl3b	sphingomyelin phosphodiesterase, acid-like 3B	1.13	0.0208
	17727918	NM_001007689	Ciapin1	cytokine induced apoptosis inhibitor 1	1.13	0.00223
	17650029	NM_001105828	Supt4h1	suppressor of Ty 4 homolog 1 (S, cerevisiae)	1.13	0.0196
	17633701	---	---	---	1.13	0.0121
	17824668	BC092580 // BC092580	Igh-6 // Igh-6	immunoglobulin heavy chain 6 // immunoglobulin heavy chain 6	1.13	0.0426
	17650117	XM_001081191	Vezf1	vascular endothelial zinc finger 1	1.13	0.00249
	17659665	---	---	---	1.13	0.0321
	17698109	NM_001106031	Pnp	purine nucleoside phosphorylase	1.13	0.00166
	17866859	---	---	---	1.13	0.00814
	17674437	NM_001108339	Gatc	glutamyl-tRNA(Gln) amidotransferase, subunit C homolog (bacterial)	1.13	0.00161
	17656666	NM_001013115 // NM_001013115 // NM_001013115	Guk1 // Guk1 // Guk1	guanylate kinase 1 // guanylate kinase 1 // guanylate kinase 1	1.13	0.00884
	17711987	ENSRNOT00000042587	Adam24	ADAM metallopeptidase domain 24	1.13	0.0194
	17864745	NM_001106913	Clk1	CDC-like kinase 1	1.13	0.00048
	17724722	NM_001135757	Fundc2	FUN14 domain containing 2	1.13	0.0221
	17740492	---	---	---	1.13	0.0165
	17768937	NM_001108605	Pcif1	PDX1 C-terminal inhibiting factor 1	1.13	0.0321
	17621023	ENSRNOT00000066988	Zfp646	zinc finger protein 646	1.13	0.0116
	17668088	ENSRNOT00000002254	Erg	v-ets erythroblastosis virus E26 oncogene homolog (avian)	1.13	0.0104
	17639167	XM_002728854	LOC100361529	rCG47324-like	1.13	0.0433
	17869232	NM_022394	Safb	scaffold attachment factor B	1.13	0.00727
	17846922	NM_001108179	Stag1	stromal antigen 1	1.13	0.0252
	17637675	NM_001106301	Nsmce4a	non-SMC element 4 homolog A (S, cerevisiae)	1.13	0.0256
	17802937	ENSRNOT00000022713	Paqr7	progestin and adipoQ receptor family member VII	1.13	0.0394
	17780379	---	---	---	1.13	0.0227
	17816376	NM_001108029	Arid4a	AT rich interactive domain 4A (Rbp1 like)	1.13	0.00811
	17766882	NM_001108594	Dtd1	D-tyrosyl-tRNA deacylase 1 homolog (S, cerevisiae)	1.13	0.00233
	17794985	NM_001106622	Tapbpl	TAP binding protein-like	1.13	0.00118
	17780027	---	---	---	1.13	0.0087
	17803067	NM_001164143	Cnr2	cannabinoid receptor 2 (macrophage)	1.13	0.0295
	17676874	NM_001105920	Alkbh4	alkB, alkylation repair homolog 4 (E, coli)	1.13	0.0143
	17803411	NM_199108	Hp1bp3	heterochromatin protein 1, binding protein 3	1.13	0.0165
	17752612	NM_173102	Tubb5	tubulin, beta 5 class I	1.13	0.00627
	17755357	NM_001013033	Tspyl1	TSPY-like 1	1.13	0.0085
	17613406	NM_001107478	Zbtb45	zinc finger and BTB domain containing 45	1.13	0.0124
	17802641	NM_001108685	Srsf4	serine/arginine-rich splicing factor 4	1.13	0.00984
	17824595	NM_001170595	Gpr132	G protein-coupled receptor 132	1.13	0.0122
	17749668	---	---	---	1.13	0.0204
	17705143	XM_344452	RGD1565438	similar to ATP synthase, H+ transporting, mitochondrial Fo complex, subunit g	1.13	0.0271
	17827812	NM_001025052	LOC500825	hypothetical protein LOC500825	1.13	0.0258
	17645040	---	---	---	1.13	0.0316
	17665330	---	---	---	1.13	0.0117
	17836837	NM_001130560	Rnf19a	ring finger protein 19A	1.13	0.0217
	17756399	NM_001034157	Gpank1	G patch domain and ankyrin repeats 1	1.13	0.0123
	17614833	NM_001025643	Fbl	fibrillarin	1.13	0.0324
	17658610	NM_001047843	Rpa1	replication protein A1	1.13	0.0275
	17797295	NM_001191755	Rad54b	RAD54 homolog B (S, cerevisiae)	1.13	0.0493
	17810860	NM_001014192 // NM_001014192 // NM_001014192	Tmem39b // Tmem39b // Tmem39b	transmembrane protein 39b // transmembrane protein 39b // transmembrane protein 39b	1.13	0.00344
	17758806	NM_001033656	Man1a1	mannosidase, alpha, class 1A, member 1	1.13	0.0296
	17719755	ENSRNOT00000018746	LOC684996	similar to chromosome 7 open reading frame 11	1.13	0.0271
	17793009	NM_001014188	Isy1	ISY1 splicing factor homolog (S, cerevisiae)	1.13	0.0171
	17718322	NM_207165	Arl10	ADP-ribosylation factor-like 10	1.13	0.00712
	17880955	---	---	---	1.13	0.0234
	17871099	NM_001108248	Was	Wiskott-Aldrich syndrome homolog (human)	1.13	0.0273
	17647316	NM_001107010	Ctc1	CTS telomere maintenance complex component 1	1.13	0.0227
	17759167	ENSRNOT00000000715	Amd1	adenosylmethionine decarboxylase 1	1.13	0.0157
	17674239	NM_139332 // NM_139332 // NM_139332	Tpcn1 // Tpcn1 // Tpcn1	two pore segment channel 1 // two pore segment channel 1 // two pore segment channel 1	1.13	0.00455
	17764059	ENSRNOT00000021837	Ckap5	cytoskeleton associated protein 5	1.13	0.0214
	17646161	NM_001109633	LOC691277	similar to Robo-1	1.13	0.0211
	17815584	ENSRNOT00000036337	LOC680646	similar to 40S ribosomal protein S2	1.13	0.0301
	17655627	NM_001014117	Ublcp1	ubiquitin-like domain containing CTD phosphatase 1	1.13	0.0147
	17855444	XM_236613	Rbm15b	RNA binding motif protein 15B	1.13	0.00192
	17866997	XR_146171	LOC100365310	EG212225 protein-like	1.13	0.011
	17674737	NM_001108340	Hscb	HscB iron-sulfur cluster co-chaperone homolog (E, coli)	1.13	0.0125
	17815420	NM_001108707	Twistnb	TWIST neighbor	1.13	0.049
	17869721	NM_001009503	Pfn4	profilin family, member 4	1.13	0.0207
	17792628	NM_001106602	Dguok	deoxyguanosine kinase	1.13	0.0219
	17750211	NM_001191711	Ddx20	DEAD (Asp-Glu-Ala-Asp) box polypeptide 20	1.12	0.0218
	17790123	NM_001109225	Zfp800	zinc finger protein 800	1.12	0.0439
	17630828	NM_001008303	Snrpa	small nuclear ribonucleoprotein polypeptide A	1.12	0.0276
	17721077	NM_001107367	Nsun6	NOP2/Sun domain family, member 6	1.12	0.0267
	17674349	BC086340	Suds3	suppressor of defective silencing 3 homolog (S, cerevisiae)	1.12	0.0329
	17702589	ENSRNOT00000066802 // ENSRNOT00000066802 // ENSRNOT00000066802 // ENSRNOT00000066802 // ENSRNOT00000066802 // ENSRNOT00000066802	LOC100361669 // LOC100361637 // LOC100361669 // LOC100361637 // LOC100361669 // LOC100361637	hypothetical protein LOC100361669 // hypothetical protein LOC100361637 // hypothetical protein LOC100361669 // hypothetical protein LOC100361637 // hypothetical protein LOC100361669 // hypothetical protein LOC100361637	1.12	0.0228
	17637510	NM_001107553	Zfp668	zinc finger protein 668	1.12	0.0357
	17671745	ENSRNOT00000038958 // ENSRNOT00000038958	LOC100365424 // LOC100360200	cleavage and polyadenylation specific factor 4, 30kDa-like // cleavage and polyadenylation specific factor 4	1.12	0.0377
	17771494	---	---	---	1.12	0.0249
	17730481	XM_226509	Sdr42e1	short chain dehydrogenase/reductase family 42E, member 1	1.12	0.0238
	17676790	NM_001100678	Mepce	methylphosphate capping enzyme	1.12	0.00843
	17739562	---	---	---	1.12	0.0158
	17654574	NM_001109443	Ndufb10	NADH dehydrogenase (ubiquinone) 1 beta subcomplex, 10	1.12	0.0153
	17814758	NM_001108014	Smc6	structural maintenance of chromosomes 6	1.12	0.0132
	17610582	NM_053698	Cited2	Cbp/p300-interacting transactivator, with Glu/Asp-rich carboxy-terminal domain, 2	1.12	0.0207
	17763041	---	---	---	1.12	0.0278
	17779762	XM_002729255	LOC100360757	CCCTC-binding factor (zinc finger protein)-like	1.12	0.0383
	17767250	---	---	---	1.12	0.0324
	17752832	NM_001001970	Ly6g6d	lymphocyte antigen 6 complex, locus G6D	1.12	0.00522
	17806347	NM_001201375	RGD1305158	similar to RIKEN cDNA 1810030N24	1.12	0.0365
	17687623	NM_001107891	Ppp2r5a	protein phosphatase 2, regulatory subunit B', alpha	1.12	0.0262
	17615119	NM_130403	Ppp1r14a	protein phosphatase 1, regulatory (inhibitor) subunit 14A	1.12	0.00998
	17833575	NM_001014200	Sppl2b	signal peptide peptidase-like 2B	1.12	0.0305
	17613971	NM_138921	Eml2	echinoderm microtubule associated protein like 2	1.12	0.00336
	17618379	---	---	---	1.12	0.00655
	17634982	---	---	---	1.12	0.00655
	17820243	NM_001106706	Ttc27	tetratricopeptide repeat domain 27	1.12	0.0284
	17719562	---	---	---	1.12	0.00288
	17699991	NM_199084	Rcbtb2	regulator of chromosome condensation (RCC1) and BTB (POZ) domain containing protein 2	1.12	0.0252
	17706865	NM_001134790	Dda1	DET1 and DDB1 associated 1	1.12	0.00246
	17807732	XM_001061972	RGD1307983	similar to HSPC043 protein	1.12	0.0491
	17619664	NM_182669	Micalcl	MICAL C-terminal like	1.12	0.0116
	17879900	NM_001135839	Naa10	N(alpha)-acetyltransferase 10, NatA catalytic subunit	1.12	0.0103
	17820586	NM_001106709	Slc4a1ap	solute carrier family 4 (anion exchanger), member 1, adaptor protein	1.12	0.0445
	17651220	NM_032061	Cntnap1	contactin associated protein 1	1.12	0.0462
	17864771	NM_001012003	Orc2	origin recognition complex, subunit 2	1.12	0.0249
	17710221	---	---	---	1.12	0.0435
	17821660	XM_234077	RGD1560073	similar to ribosomal protein S10	1.12	0.043
	17716090	ENSRNOT00000022483	Ggps1	geranylgeranyl diphosphate synthase 1	1.12	0.0274
	17648811	---	---	---	1.12	0.0453
	17795365	NM_134327	Cd69	Cd69 molecule	1.12	0.0376
	17623647	NM_031332	Slc22a8	solute carrier family 22 (organic anion transporter), member 8	1.12	0.00539
	17754267	NM_001109593	LOC690460	similar to keratin associated protein 10-7	1.12	0.0264
	17679532	---	---	---	1.12	0.0454
	17879921	NM_001139507	Hcfc1	host cell factor C1	1.12	0.0382
	17718061	ENSRNOT00000029885	Ddx46	DEAD (Asp-Glu-Ala-Asp) box polypeptide 46	1.12	0.0146
	17833592	NM_139081	Oaz1	ornithine decarboxylase antizyme 1	1.12	0.00154
	17737735	NM_001039033	Actl6a	actin-like 6A	1.12	0.0479
	17748642	NR_031811 // NR_031811 // NR_031811	Mir9-1 // Mir9-1 // Mir9-1	microRNA mir-9-1 // microRNA mir-9-1 // microRNA mir-9-1	1.12	0.0431
	17686658	NM_021740 // NM_021740 // NM_021740	Ptma // Ptma // Ptma	prothymosin alpha // prothymosin alpha // prothymosin alpha	1.12	0.00574
	17781344	NM_001024246	RGD1310794	similar to RIKEN cDNA C030048B08	1.12	0.0339
	17698974	---	---	---	1.12	0.0359
	17790272	NR_037330 // NR_037330 // NR_037330	Mir3553 // Mir3553 // Mir3553	microRNA mir-3553 // microRNA mir-3553 // microRNA mir-3553	1.12	0.0151
	17807242	ENSRNOT00000008883	RGD1307218	similar to RIKEN cDNA 2810432L12	1.12	0.0495
	17793003	NM_001024331	Rab43	RAB43, member RAS oncogene family	1.12	0.0322
	17620830	ENSRNOT00000055002	Prr14	proline rich 14	1.12	0.0287
	17832392	ENSRNOT00000006239	Dazap2	DAZ associated protein 2	1.12	0.0012
	17687759	ENSRNOT00000057151	Cd46	CD46 molecule, complement regulatory protein	1.12	0.0373
	17688102	NM_022956	Barhl2	BarH-like homeobox 2	1.12	0.00685
	17633333	NM_001009644	Dbx1	developing brain homeobox 1	1.12	0.0491
	17629243	NM_080695	Cacng7	calcium channel, voltage-dependent, gamma subunit 7	1.12	0.0489
	17725159	NM_001017446	Ino80c	INO80 complex subunit C	1.12	0.036
	17731309	ENSRNOT00000016462	Pdp2	pyruvate dehyrogenase phosphatase catalytic subunit 2	1.12	0.0477
	17647366	NM_012663	Vamp2	vesicle-associated membrane protein 2	1.12	0.0339
	17656438	NM_001007669	Zfp672	zinc finger protein 672	1.12	0.0473
	17706694	ENSRNOT00000017424	Cherp	calcium homeostasis endoplasmic reticulum protein	1.12	0.0132
	17692009	NM_001191684	Fancl	Fanconi anemia, complementation group L	1.12	0.0277
	17718914	NM_001106107	Snrnp48	small nuclear ribonucleoprotein 48k (U11/U12)	1.12	0.0199
	17750225	NM_001005765	Rap1a	RAP1A, member of RAS oncogene family	1.12	0.0102
	17672609	NM_001127551	Lrch4	leucine-rich repeats and calponin homology (CH) domain containing 4	1.12	0.0204
	17693281	XM_001065244	LOC685782	similar to PRAME family member 9	1.12	0.0332
	17700060	XM_224403	RGD1304929	similar to chromosome 13 open reading frame 18	1.12	0.0148
	17647614	ENSRNOT00000032644	RGD1560902	similar to Cofilin, non-muscle isoform (Cofilin-1)	1.12	0.0342
	17647590	NM_001017477	Gps2	G protein pathway suppressor 2	1.12	0.00224
	17620845	ENSRNOT00000055003	Fbrs	fibrosin	1.12	0.00516
	17634253	NM_031145	Cib1	calcium and integrin binding 1 (calmyrin)	1.12	9.24e-05
	17833835	NM_001108067	Hmha1	histocompatibility (minor) HA-1	1.12	0.0377
	17832329	NM_001100895	Atf1	activating transcription factor 1	1.12	0.00243
	17703158	XM_577429	RGD1564878	similar to natural killer cell protease 7	1.12	0.0027
	17615597	---	---	---	1.12	0.0442
	17734787	NM_053526 // NM_053526 // NM_053526	Cpn1 // Cpn1 // Cpn1	carboxypeptidase N, polypeptide 1 // carboxypeptidase N, polypeptide 1 // carboxypeptidase N, polypeptide 1	1.12	0.00851
	17639595	ENSRNOT00000036745	Snx32	sorting nexin 32	1.12	0.00448
	17810177	NM_012866	Nfyc	nuclear transcription factor-Y gamma	1.12	0.0106
	17836175	ENSRNOT00000024679	Tbc1d30	TBC1 domain family, member 30	1.12	0.00983
	17617581	NM_001108487	Aen	apoptosis enhancing nuclease	1.12	0.0133
	17716175	NM_001107358	Zfp438	zinc finger protein 438	1.12	0.034
	17659421	---	---	---	1.12	0.0205
	17850249	NM_001013939	Raver1	ribonucleoprotein, PTB-binding 1	1.12	0.00465
	17843951	NM_001024801	Zw10	ZW10, kinetochore associated, homolog (Drosophila)	1.12	0.00698
	17676540	NR_031853	Mir93	microRNA mir-93	1.12	0.00614
	17880708	---	---	---	1.12	0.0445
	17614731	ENSRNOT00000025303	Akt2	v-akt murine thymoma viral oncogene homolog 2	1.12	0.0422
	17658223	NM_053616	Nup88	nucleoporin 88	1.12	0.019
	17822258	NM_001014197	Dnaaf2	dynein, axonemal, assembly factor 2	1.12	0.0134
	17805396	NM_001191864	Cspp1	centrosome and spindle pole associated protein 1	1.12	0.00876
	17786577	NM_001002823 // NM_001002823 // NM_001002823	Wnk1 // Wnk1 // Wnk1	WNK lysine deficient protein kinase 1 // WNK lysine deficient protein kinase 1 // WNK lysine deficient protein kinase 1	1.12	0.0281
	17732664	NM_001100922	Prkaca	protein kinase, cAMP-dependent, catalytic, alpha	1.12	0.011
	17631972	ENSRNOT00000030186	Lsm14a	LSM14A, SCD6 homolog A (S, cerevisiae)	1.12	0.0207
	17834365	---	---	---	1.12	0.0169
	17640944	NM_001100975	Vps13a	vacuolar protein sorting 13 homolog A (S, cerevisiae)	1.12	0.0174
	17681203	NM_001025126 // NM_001025126	Rfwd2 // Rfwd2	ring finger and WD repeat domain 2 // ring finger and WD repeat domain 2	1.12	0.0323
	17646542	---	---	---	1.12	0.0202
	17704290	ENSRNOT00000058570	Ppp3cc	protein phosphatase 3, catalytic subunit, gamma isozyme	1.12	0.00934
	17826216	NM_001108732	Lsm7	LSM7 homolog, U6 small nuclear RNA associated (S, cerevisiae)	1.12	0.031
	17692732	NM_001037179	Lrrc8c	leucine rich repeat containing 8 family, member C	1.12	0.00663
	17733736	NM_001134608	RGD1559505	similar to RIKEN cDNA 9030409E16	1.12	0.0137
	17729538	NM_001109130	Tsnaxip1	translin-associated factor X interacting protein 1	1.12	0.0199
	17795123	ENSRNOT00000006878	Prmt8	protein arginine methyltransferase 8	1.12	0.00482
	17631667	NM_001014159	Rbm42	RNA binding motif protein 42	1.12	0.0101
	17845871	NM_022671	Onecut1	one cut homeobox 1	1.12	0.0403
	17752811	NM_031021	Csnk2b	casein kinase 2, beta polypeptide	1.12	0.000468
	17720752	NM_001108421 // NM_001108421 // NM_001108421	Upf2 // Upf2 // Upf2	UPF2 regulator of nonsense transcripts homolog (yeast) // UPF2 regulator of nonsense transcripts homolog (yeast) // UPF2 regulator of nonsense transcripts homolog (yeast)	1.12	0.0281
	17675353	NM_001102383	Pds5b	PDS5, regulator of cohesion maintenance, homolog B (S, cerevisiae)	1.12	0.013
	17652915	XM_001081720	Fam100b	family with sequence similarity 100, member B	1.12	0.0156
	17660076	NM_001108291	Luc7l3	LUC7-like 3 (S, cerevisiae)	1.12	0.00533
	17798906	---	---	---	1.12	0.0245
	17714849	ENSRNOT00000022669	Phf2	PHD finger protein 2	1.12	0.0176
	17868505	NM_001107071	Cbx2	chromobox homolog 2	1.12	0.0266
	17696647	ENSRNOT00000065110	Rel	v-rel reticuloendotheliosis viral oncogene homolog (avian)	1.12	0.00762
	17874989	NM_001109323	F8a1	coagulation factor VIII-associated 1	1.12	0.0267
	17646341	---	---	---	1.12	0.0295
	17754429	---	---	---	1.12	0.0209
	17631580	NM_001106245	Lin37	lin-37 homolog (C, elegans)	1.12	0.00537
	17654893	NM_001191822	Rhbdl1	rhomboid, veinlet-like 1 (Drosophila)	1.12	0.0161
	17870953	NM_001191586	Bcor	BCL6 co-repressor	1.12	0.0419
	17842538	NM_134368	Smarca4	SWI/SNF related, matrix associated, actin dependent regulator of chromatin, subfamily a, member 4	1.12	0.0299
	17627005	---	---	---	1.12	0.0243
	17743207	---	---	---	1.11	0.0219
	17632887	NM_022500	Ftl	ferritin, light polypeptide	1.11	0.00813
	17640491	NM_001008371	Sdhaf2	succinate dehydrogenase complex assembly factor 2	1.11	0.00129
	17623894	NM_001033901	Tut1	terminal uridylyl transferase 1, U6 snRNA-specific	1.11	0.00352
	17770903	NM_001108575	Brd3	bromodomain containing 3	1.11	0.00801
	17835061	NM_001191780	Scyl2	SCY1-like 2 (S, cerevisiae)	1.11	0.0181
	17702878	XM_002728280	LOC100362547	adaptor protein complex AP-1, gamma 2 subunit	1.11	0.00933
	17651346	NM_001009625	Ifi35	interferon-induced protein 35	1.11	0.0321
	17856210	NM_198754	Cmtm8	CKLF-like MARVEL transmembrane domain containing 8	1.11	0.0151
	17641253	BC166504	Fam189a2	family with sequence similarity 189, member A2	1.11	0.029
	17793044	---	---	---	1.11	0.0337
	17711915	NM_031076	Pcm1	pericentriolar material 1	1.11	0.00316
	17669453	XM_001071670	Ptplb	protein tyrosine phosphatase-like (proline instead of catalytic arginine), member b	1.11	0.0296
	17710788	NM_001106068	B3gnt3	UDP-GlcNAc:betaGal beta-1,3-N-acetylglucosaminyltransferase 3	1.11	0.0427
	17673458	ENSRNOT00000001277	Slc15a4	solute carrier family 15, member 4	1.11	0.00869
	17768280	NM_001024870	Ctnnbl1	catenin, beta like 1	1.11	0.0149
	17717525	NM_001100577	Apbb1ip	amyloid beta (A4) precursor protein-binding, family B, member 1 interacting protein	1.11	0.0141
	17823284	NM_001191771	Prox2	prospero homeobox 2	1.11	0.0213
	17790013	NM_001044278	Rnf133	ring finger protein 133	1.11	0.0208
	17710521	NM_001108822	RGD1305537	similar to RIKEN cDNA 3110001I22	1.11	0.0477
	17688439	NM_001100564	Lin54	lin-54 homolog (C, elegans)	1.11	0.0242
	17621231	NM_001107554	Inpp5f	inositol polyphosphate-5-phosphatase F	1.11	0.032
	17827853	NM_001025053	Galnt4	UDP-N-acetyl-alpha-D-galactosamine:polypeptide N-acetylgalactosaminyltransferase 4 (GalNAc-T4)	1.11	0.0171
	17784253	---	---	---	1.11	0.0312
	17787711	NM_031762	Cdkn1b	cyclin-dependent kinase inhibitor 1B	1.11	0.0359
	17816404	XM_001072851	Tomm20l	translocase of outer mitochondrial membrane 20 homolog (yeast)-like	1.11	0.0492
	17642558	ENSRNOT00000026609	Cuedc2	CUE domain containing 2	1.11	0.00427
	17635987	NM_001000219	Olr252	olfactory receptor 252	1.11	0.032
	17803740	ENSRNOT00000008940	Rcc2	regulator of chromosome condensation 2	1.11	0.0177
	17759666	NM_001007698	Golph3l	golgi phosphoprotein 3-like	1.11	0.0111
	17616479	NM_031102	Rpl18	ribosomal protein L18	1.11	0.00813
	17790499	NM_001024325	LOC500077	similar to RIKEN cDNA 3110062M04	1.11	0.0009
	17880927	---	---	---	1.11	0.0254
	17758316	FQ209472	LOC100360936	rCG22080-like	1.11	0.0333
	17724176	NM_001079698	Cxxc1	CXXC finger protein 1	1.11	0.00949
	17758289	---	---	---	1.11	0.0495
	17810594	NM_001191765	Eif2c1	eukaryotic translation initiation factor 2C, 1	1.11	0.0248
	17684022	ENSRNOT00000061070	Mapkapk2	mitogen-activated protein kinase-activated protein kinase 2	1.11	0.0017
	17683500	---	---	---	1.11	0.00427
	17671671	ENSRNOT00000001302	Zfp394	zinc finger protein 394	1.11	0.0136
	17706681	NM_001107300	Med26	mediator complex subunit 26	1.11	0.0169
	17691774	ENSRNOT00000010264	Vps54	vacuolar protein sorting 54 homolog (S, cerevisiae)	1.11	0.0144
	17758549	NM_001033069	Eif4ebp2	eukaryotic translation initiation factor 4E binding protein 2	1.11	0.0165
	17707312	NM_001107307	Cilp2	cartilage intermediate layer protein 2	1.11	0.0382
	17615800	XM_001080344	Vsig10l	V-set and immunoglobulin domain containing 10 like	1.11	0.0393
	17831312	ENSRNOT00000018155	Npap60	nuclear pore associated protein	1.11	0.0198
	17746744	NM_001191703	Samd7	sterile alpha motif domain containing 7	1.11	0.0299
	17879951	ENSRNOT00000065177	Irak1	interleukin-1 receptor-associated kinase 1	1.11	0.00884
	17648270	NM_001033682	Shpk	sedoheptulokinase	1.11	0.0395
	17871080	NM_053696	Rbm3	RNA binding motif (RNP1, RRM) protein 3	1.11	0.0477
	17630805	NM_001004083	Egln2	EGL nine homolog 2 (C, elegans)	1.11	0.0021
	17630030	NM_001106226	Gltscr1	glioma tumor suppressor candidate region gene 1	1.11	0.0145
	17714581	NM_001106059	Thoc3	THO complex 3	1.11	0.0204
	17811071	NM_001109268	Gmeb1	glucocorticoid modulatory element binding protein 1	1.11	0.0397
	17706222	NM_001107293	Eaf1	ELL associated factor 1	1.11	0.0147
	17614124	NM_144757	Zfp180	zinc finger protein 180	1.11	0.0077
	17834069	ENSRNOT00000011117 // ENSRNOT00000011117	Giot1 // Giot1	gonadotropin inducible ovarian transcription factor 1 // gonadotropin inducible ovarian transcription factor 1	1.11	0.0297
	17769315	NM_001033708	Rae1	RAE1 RNA export 1 homolog (S, pombe)	1.11	0.0112
	17716768	NM_001039023	Net1	neuroepithelial cell transforming 1	1.11	0.014
	17866827	ENSRNOT00000014921	RGD1560925	similar to 2610034M16Rik protein	1.11	0.0276
	17802830	NM_001012099	Xkr8	XK, Kell blood group complex subunit-related family, member 8	1.11	0.0478
	17816459	NM_001108030	Daam1	dishevelled associated activator of morphogenesis 1	1.11	0.0132
	17657592	---	---	---	1.11	0.00618
	17741908	NM_001014042	Mybphl	myosin binding protein H-like	1.11	0.032
	17751643	NM_001106476	Metap1	methionyl aminopeptidase 1	1.11	0.0279
	17750803	NM_001100810	Rnpc3	RNA-binding region (RNP1, RRM) containing 3	1.11	0.0301
	17802044	NM_001112716	Grik3	glutamate receptor, ionotropic, kainate 3	1.11	0.0209
	17743657	NM_031616	Zranb2	zinc finger, RAN-binding domain containing 2	1.11	0.0229
	17635656	NM_001107543	Ubqln3	ubiquilin 3	1.11	0.0147
	17723545	NM_001025676	Rbm22	RNA binding motif protein 22	1.11	0.00151
	17805564	NM_001025735	Tcea1	transcription elongation factor A (SII) 1	1.11	0.0147
	17781773	NM_031730	Kcnd2	potassium voltage-gated channel, Shal-related subfamily, member 2	1.11	0.049
	17719074	NM_001013886 // NM_001013886 // NM_001013886	Tubb2b // Tubb2b // Tubb2b	tubulin, beta 2B class IIb // tubulin, beta 2B class IIb // tubulin, beta 2B class IIb	1.11	0.0122
	17719079	NM_001013886 // NM_001013886 // NM_001013886	Tubb2b // Tubb2b // Tubb2b	tubulin, beta 2B class IIb // tubulin, beta 2B class IIb // tubulin, beta 2B class IIb	1.11	0.0122
	17654645	ENSRNOT00000022050	Cramp1l	Crm, cramped-like (Drosophila)	1.11	0.029
	17785965	NM_001107880	Mtmr14	myotubularin related protein 14	1.11	0.00882
	17677050	NM_001109021 // NM_001109021 // NM_001109021	Bcl7b // Bcl7b // Bcl7b	B-cell CLL/lymphoma 7B // B-cell CLL/lymphoma 7B // B-cell CLL/lymphoma 7B	1.11	0.0215
	17802663	ENSRNOT00000009173	Arid1a	AT rich interactive domain 1A (SWI-like)	1.11	0.00818
	17740984	BC079138	Hist2h2bb	histone cluster 2, H2bb	1.11	0.0348
	17662377	---	---	---	1.11	0.045
	17803550	NM_134407	Akr7a2	aldo-keto reductase family 7, member A2 (aflatoxin aldehyde reductase)	1.11	0.049
	17671165	NM_001108848	Elavl1	ELAV (embryonic lethal, abnormal vision, Drosophila)-like 1 (Hu antigen R)	1.11	0.000993
	17747254	NM_001033909	Elf2	E74-like factor 2	1.11	0.00095
	17778311	XM_001072887	Zcchc3	zinc finger, CCHC domain containing 3	1.11	0.0102
	17698251	ENSRNOT00000066802 // ENSRNOT00000066802 // ENSRNOT00000066802 // ENSRNOT00000066802 // ENSRNOT00000066802 // ENSRNOT00000066802	LOC100361669 // LOC100361637 // LOC100361669 // LOC100361637 // LOC100361669 // LOC100361637	hypothetical protein LOC100361669 // hypothetical protein LOC100361637 // hypothetical protein LOC100361669 // hypothetical protein LOC100361637 // hypothetical protein LOC100361669 // hypothetical protein LOC100361637	1.11	0.047
	17842140	---	---	---	1.11	0.0443
	17721306	ENSRNOT00000033663	Mtcp1	mature T-cell proliferation 1	1.11	0.00742
	17677004	NM_001191827	Rhbdd2	rhomboid domain containing 2	1.11	0.00842
	17701260	AJ002942 // AJ002942 // AJ002942	Rarb // Rarb // Rarb	retinoic acid receptor, beta // retinoic acid receptor, beta // retinoic acid receptor, beta	1.11	0.0427
	17776960	NM_001025043	Itpripl1	inositol 1,4,5-trisphosphate receptor interacting protein-like 1	1.11	0.023
	17677079	NM_001109499	Wbscr27	Williams Beuren syndrome chromosome region 27	1.11	0.0376
	17624448	NM_001024293	LOC499331	similar to hypothetical protein D030056L22	1.11	0.0284
	17861888	NM_001108810	Ing5	inhibitor of growth family, member 5	1.11	0.0281
	17803864	NM_001109272	Rsg1	REM2 and RAB-like small GTPase 1	1.11	0.0239
	17851716	XM_002727050	Mizf	MBD2-interacting zinc finger	1.11	0.00271
	17684696	---	---	---	1.11	0.0266
	17872281	ENSRNOT00000006843	Txlng	taxilin gamma	1.11	0.0299
	17875860	XM_002727525	Kdm6a	lysine (K)-specific demethylase 6A	1.11	0.0096
	17697536	---	---	---	1.11	0.0216
	17782153	NM_001100708	Nrf1	nuclear respiratory factor 1	1.11	0.0161
	17642891	NM_001035234	Smndc1	survival motor neuron domain containing 1	1.11	0.0219
	17777845	---	---	---	1.11	0.0363
	17774399	NM_017269 // NM_017269 // NM_017269	Ptprj // Ptprj // Ptprj	protein tyrosine phosphatase, receptor type, J // protein tyrosine phosphatase, receptor type, J // protein tyrosine phosphatase, receptor type, J	1.11	0.00597
	17727176	NM_001107374	RGD1308601	similar to hypothetical protein	1.11	0.011
	17792507	NM_001108634	Pole4	polymerase (DNA-directed), epsilon 4 (p12 subunit)	1.11	0.0375
	17696660	NM_001107244	Papolg	poly(A) polymerase gamma	1.11	0.0162
	17652050	NM_001107057	Dcaf7	DDB1 and CUL4 associated factor 7	1.11	0.017
	17861254	NM_019311	Inpp5d	inositol polyphosphate-5-phosphatase D	1.11	0.0171
	17704616	ENSRNOT00000001389	Slc25a30	solute carrier family 25, member 30	1.11	0.00296
	17647139	NM_053484	Gas7	growth arrest specific 7	1.11	0.0453
	17653887	NM_001014115	LOC360479	similar to hypothetical protein	1.11	0.027
	17830688	NM_001033703	Apobec3b	apolipoprotein B mRNA editing enzyme, catalytic polypeptide-like 3B	1.11	0.0496
	17754639	ENSRNOT00000000753	Tfam	transcription factor A, mitochondrial	1.11	0.0201
	17654396	ENSRNOT00000012203	Dnase1l2	deoxyribonuclease I-like 2	1.11	0.0233
	17800268	NM_017031	Pde4b	phosphodiesterase 4B, cAMP specific	1.11	0.0445
	17611107	NM_001032397	Tcf21	transcription factor 21	1.11	0.048
	17619502	---	---	---	1.11	0.00844
	17752362	NM_001166300	Znrd1	zinc ribbon domain containing 1	1.11	0.0168
	17650108	ENSRNOT00000055706	Srsf1	serine/arginine-rich splicing factor 1	1.11	0.0258
	17744831	NM_001108936	Marveld2	MARVEL domain containing 2	1.11	0.0253
	17836505	NM_001170566	Mbd6	methyl-CpG binding domain protein 6	1.11	0.0313
	17622041	NM_001107561	Scgb1c1	secretoglobin, family 1C, member 1	1.11	0.042
	17817851	NM_001031657	Tdp1	tyrosyl-DNA phosphodiesterase 1	1.11	0.0215
	17757342	---	---	---	1.11	0.0296
	17760801	NM_001025731	Gle1	GLE1 RNA export mediator homolog (yeast)	1.11	0.0265
	17814945	NM_012615	Odc1	ornithine decarboxylase 1	1.11	0.043
	17736162	ENSRNOT00000018545	C9	complement component 9	1.11	0.00561
	17740689	NM_001107693	Pogz	pogo transposable element with ZNF domain	1.11	0.00268
	17727707	NM_031851 // NM_031851 // NM_031851	Phb // Phb // Phb	prohibitin // prohibitin // prohibitin	1.11	0.0364
	17856203	NM_001109300	Cmtm7	CKLF-like MARVEL transmembrane domain containing 7	1.11	0.0264
	17741598	NM_001191710	Rsbn1	round spermatid basic protein 1	1.11	0.0418
	17838353	NM_001163519	LOC680799	hypothetical protein LOC680799	1.11	0.0472
	17626152	BC083852	RGD1309313	similar to RIKEN cDNA 4930538D17	1.11	0.038
	17761580	---	---	---	1.11	0.0463
	17866121	NM_001034137	Sp110	SP110 nuclear body protein	1.11	0.02
	17797097	NM_030857	Lyn	v-yes-1 Yamaguchi sarcoma viral related oncogene homolog	1.11	0.0238
	17623408	ENSRNOT00000028592	Men1	multiple endocrine neoplasia I	1.11	0.0215
	17657523	ENSRNOT00000011185	Cntrob	centrobin, centrosomal BRCA2 interacting protein	1.11	0.0255
	17802877	---	---	---	1.11	0.0149
	17838530	ENSRNOT00000006376	LOC100362108	poly (ADP-ribose) polymerase family, member 10	1.11	0.035
	17755556	NM_001107634	Cdk19	cyclin-dependent kinase 19	1.11	0.0417
	17626987	---	---	---	1.11	0.0442
	17872130	NM_001106961	Ofd1	oral-facial-digital syndrome 1 gene homolog (human)	1.11	0.0334
	17781780	NM_001034107	Ing3	inhibitor of growth family, member 3	1.11	0.01
	17871873	ENSRNOT00000004364	Smc1a	structural maintenance of chromosomes 1A	1.11	0.0337
	17664236	---	---	---	1.11	0.0337
	17770205	NM_001107818	Ndor1	NADPH dependent diflavin oxidoreductase 1	1.11	0.0157
	17865356	NM_133299	Pecr	peroxisomal trans-2-enoyl-CoA reductase	1.11	0.0159
	17777612	NM_001100529	Tmx4	thioredoxin-related transmembrane protein 4	1.11	0.0476
	17623070	BC166555 // BC166555 // BC166555	Klc2 // Klc2 // Klc2	kinesin light chain 2 // kinesin light chain 2 // kinesin light chain 2	1.11	0.0332
	17704943	---	---	---	1.1	0.0187
	17840699	NM_001001078	Olr1105	olfactory receptor 1105	1.1	0.0282
	17641381	NM_001012172	Rfx3	regulatory factor X, 3 (influences HLA class II expression)	1.1	0.0437
	17807360	XM_232915	RGD1565912	similar to ribosomal protein S18	1.1	0.0163
	17793715	NM_001015003	Crbn	cereblon	1.1	0.00717
	17842036	NM_001108994	Fam76b	family with sequence similarity 76, member B	1.1	0.00255
	17652300	NM_024355	Axin2	axin 2	1.1	0.00612
	17753738	NM_001025727	Rnf8	ring finger protein 8	1.1	0.0287
	17878168	NM_001126373	Hdac8	histone deacetylase 8	1.1	0.0316
	17749528	NM_001108559	Prpf3	PRP3 pre-mRNA processing factor 3 homolog (S, cerevisiae)	1.1	0.0113
	17664150	NM_001034959	LOC619574	hypothetical protein LOC619574	1.1	0.00226
	17763815	NM_001013159	Fnbp4	formin binding protein 4	1.1	0.000347
	17733480	NM_001025766	Il34	interleukin 34	1.1	0.0289
	17639637	ENSRNOT00000028137	Sipa1	signal-induced proliferation-associated 1	1.1	0.045
	17624643	NM_001037793	Dock8	dedicator of cytokinesis 8	1.1	0.0304
	17711257	NM_001024772	Naf1	nuclear assembly factor 1 homolog (S, cerevisiae)	1.1	0.0216
	17754146	NM_001004225	RGD1303003	homolog of zebrafish ES1	1.1	0.00518
	17826318	NM_001012114	Rexo1	REX1, RNA exonuclease 1 homolog (S, cerevisiae)	1.1	0.00758
	17614715	BC127543	RGD1307554	similar to CG16812-PA	1.1	0.0117
	17629512	NM_057136	Epn1	Epsin 1	1.1	0.0127
	17799716	---	---	---	1.1	0.0414
	17630717	NM_001106235	Ccdc97	coiled-coil domain containing 97	1.1	0.000614
	17793583	NM_001034131	Foxp1	forkhead box P1	1.1	0.0476
	17770946	NM_001106564	RGD1306233	similar to hypothetical protein MGC29761	1.1	0.00686
	17749616	NM_001111341 // NM_001111341 // NM_001111341	Hist2h2ab // Hist2h2ab // Hist2h2ab	histone cluster 2, H2ab // histone cluster 2, H2ab // histone cluster 2, H2ab	1.1	0.0374
	17738809	---	---	---	1.1	0.00951
	17847712	NM_199099	Impdh2	IMP (inosine 5'-monophosphate) dehydrogenase 2	1.1	0.0204
	17857522	NM_001008330	Polr1c	polymerase (RNA) I polypeptide C	1.1	0.0184
	17875374	NM_001191756 // NM_001191756 // NM_001191756	Thoc2 // Thoc2 // Thoc2	THO complex 2 // THO complex 2 // THO complex 2	1.1	0.028
	17615620	XM_002725609	LOC690000	similar to CG3740-PA	1.1	0.0348
	17650821	NM_053403	Grb7	growth factor receptor bound protein 7	1.1	0.024
	17806886	ENSRNOT00000066708	Gba2	glucosidase beta 2	1.1	0.00633
	17739534	---	---	---	1.1	0.0331
	17866446	ENSRNOT00000066346	Hes6	hairy and enhancer of split 6 (Drosophila)	1.1	0.0283
	17859930	ENSRNOT00000018326	Creb1	cAMP responsive element binding protein 1	1.1	0.0133
	17703303	NM_024376	Gja3	gap junction protein, alpha 3	1.1	0.0401
	17874950	NM_001009399	Nsdhl	NAD(P) dependent steroid dehydrogenase-like	1.1	0.0443
	17771687	BC169049	Ttll11	tubulin tyrosine ligase-like family, member 11	1.1	0.0285
	17836159	NM_001191000	Lemd3	LEM domain containing 3	1.1	0.0125
	17625911	NM_001134612	Fam178a	family with sequence similarity 178, member A	1.1	0.0172
	17770874	NM_001106563	Vav2	vav 2 guanine nucleotide exchange factor	1.1	0.0344
	17830454	NM_001171981	Sh3bp1	SH3-domain binding protein 1	1.1	0.0085
	17629187	NM_001107471	Cnot3	CCR4-NOT transcription complex, subunit 3	1.1	0.00845
	17719048	NM_001011923	Prpf4b	PRP4 pre-mRNA processing factor 4 homolog B (yeast)	1.1	0.0332
	17879629	NR_037327	Mir3551	microRNA mir-3551	1.1	0.0404
	17867737	NM_133602	Khsrp	KH-type splicing regulatory protein	1.1	0.0431
	17709590	NM_001013998	Pde12	phosphodiesterase 12	1.1	0.0406
	17640135	ENSRNOT00000028763	Mark2	MAP/microtubule affinity-regulating kinase 2	1.1	0.0361
	17648922	NM_001107017	Traf4	Tnf receptor associated factor 4	1.1	0.035
	17681915	NM_001109077	Arhgap30	Rho GTPase activating protein 30	1.1	0.0246
	17779275	NM_001025769	Spata25	spermatogenesis associated 25	1.1	0.028
	17776420	NM_001191964	Mfap1a	microfibrillar-associated protein 1A	1.1	0.0393
	17869076	XR_086351	LOC501266	similar to serine/threonine protein kinase 24	1.1	0.00679
	17724461	ENSRNOT00000022767	RGD1306286	similar to mKIAA1632 protein	1.1	0.00543
	17765407	FQ226171	RGD1306924	similar to Gamma-tubulin complex component 4 (GCP-4)	1.1	0.0129
	17740372	NM_001047886	Ilf2	interleukin enhancer binding factor 2	1.1	0.00205
	17710661	---	---	---	1.1	0.0347
	17869426	XM_002730097	LOC100362054	mCG114696-like	1.1	0.0302
	17637977	NM_001122782	Mapk1ip1	mitogen-activated protein kinase 1 interacting protein 1	1.1	0.0362
	17630724	NM_001108477	Hnrnpul1	heterogeneous nuclear ribonucleoprotein U-like 1	1.1	0.0442
	17857215	NM_001108197	Taf8	TAF8 RNA polymerase II, TATA box binding protein (TBP)-associated factor	1.1	0.0306
	17786661	NM_001044280	Slc25a18	solute carrier family 25 (mitochondrial carrier), member 18	1.1	0.0204
	17703865	NM_020077	Adam2	ADAM metallopeptidase domain 2	1.1	0.00559
	17830091	NM_001004240	Gpaa1	glycosylphosphatidylinositol anchor attachment protein 1 homolog (yeast)	1.1	0.00161
	17854297	FQ233636 // FQ233636	RGD1564964 // RGD1564964	similar to WD repeat domain 11 protein // similar to WD repeat domain 11 protein	1.1	0.0202
	17861900	ENSRNOT00000025711	D2hgdh	D-2-hydroxyglutarate dehydrogenase	1.1	0.0443
	17824090	NM_138825	Serpina12	serpin peptidase inhibitor, clade A, member 12	1.1	0.0155
	17657721	NM_001007610	Wrap53	WD repeat containing, antisense to TP53	1.1	0.0395
	17830233	ENSRNOT00000047380	Gpr172a	G protein-coupled receptor 172A	1.1	0.0387
	17768314	NM_001098727	Rprd1b	regulation of nuclear pre-mRNA domain containing 1B	1.1	0.0285
	17680562	NM_001105991	Atp6v1g3	ATPase, H+ transporting, lysosomal V1 subunit G3	1.1	0.0484
	17653637	---	---	---	1.1	0.044
	17630006	ENSRNOT00000017555	Gltscr2	glioma tumor suppressor candidate region gene 2	1.1	0.00291
	17694051	NM_001013990	Srd5a3	steroid 5 alpha-reductase 3	1.1	0.015
	17811470	NM_001107986	Srrm1	serine/arginine repetitive matrix 1	1.1	0.0057
	17820013	---	---	---	1.1	0.0332
	17689895	ENSRNOT00000003907	Rfc1	replication factor C (activator 1) 1	1.1	0.0282
	17673849	ENSRNOT00000057716	Psmd9	proteasome (prosome, macropain) 26S subunit, non-ATPase, 9	1.1	0.0344
	17625604	ENSRNOT00000036414	Lcor	ligand dependent nuclear receptor corepressor	1.1	0.0428
	17872029	NM_001191732	Hccs	holocytochrome c synthase	1.1	0.0496
	17880685	NM_138523 // NM_138523 // NM_138523	Prpf18 // Prpf18 // Prpf18	PRP18 pre-mRNA processing factor 18 homolog (S, cerevisiae) // PRP18 pre-mRNA processing factor 18 homolog (S, cerevisiae) // PRP18 pre-mRNA processing factor 18 homolog (S, cerevisiae)	1.1	0.00455
	17640885	ENSRNOT00000018452	Tle4	transducin-like enhancer of split 4 (E(sp1) homolog, Drosophila)	1.1	0.0222
	17775662	ENSRNOT00000056450	Ankrd63	ankyrin repeat domain 63	1.1	0.0205
	17850291	ENSRNOT00000043014	Cdc37	cell division cycle 37 homolog (S, cerevisiae)	1.1	0.000349
	17823312	NM_001108043	Mlh3	mutL homolog 3 (E, coli)	1.1	0.0225
	17725895	NM_012576	Nr3c1	nuclear receptor subfamily 3, group C, member 1	1.1	0.00727
	17733441	NM_001017454	Ist1	increased sodium tolerance 1 homolog (yeast)	1.1	0.00957
	17663252	NM_001007674	Slc25a19	solute carrier family 25 (mitochondrial thiamine pyrophosphate carrier), member 19	1.1	0.0481
	17838174	ENSRNOT00000056571	LOC100366002	cytochrome P450 11B1, mitochondrial-like	1.1	0.0391
	17688631	NM_001105998	Ccni	cyclin I	1.1	0.02
	17794763	ENSRNOT00000065416	Ptpn6	protein tyrosine phosphatase, non-receptor type 6	1.1	0.0163
	17655146	ENSRNOT00000067079	Snrnp25	small nuclear ribonucleoprotein 25 (U11/U12)	1.1	0.0294
	17622805	NM_001011937	Doc2g	double C2, gamma	1.1	0.00929
	17755510	NM_001083966	Rev3l	REV3-like, catalytic subunit of DNA polymerase zeta (yeast)	1.1	0.0327
	17638131	NM_053712	Msx3	homeo box, msh-like 3	1.1	0.00916
	17794224	---	---	---	1.1	0.031
	17815492	NM_001108019	Ankmy2	ankyrin repeat and MYND domain containing 2	1.1	0.04
	17623873	NM_001100740	Mta2	metastasis associated 1 family, member 2	1.1	0.036
	17763650	NM_001000325	Olr560	olfactory receptor 560	1.1	0.0273
	17792280	NM_134351	Mat2a	methionine adenosyltransferase II, alpha	1.1	0.0198
	17787431	ENSRNOT00000027092	Parp11	poly (ADP-ribose) polymerase family, member 11	1.1	0.0236
	17768439	NM_001108600	Actr5	ARP5 actin-related protein 5 homolog (yeast)	1.1	0.0457
	17815162	NM_001013097	Rnaseh1	ribonuclease H1	1.1	0.0118
	17809765	NM_001015007	Dph2	DPH2 homolog (S, cerevisiae)	1.1	0.0343
	17679173	NM_001135743 // NM_001135743 // NM_001135743	Wbscr22 // Wbscr22 // Wbscr22	Williams Beuren syndrome chromosome region 22 // Williams Beuren syndrome chromosome region 22 // Williams Beuren syndrome chromosome region 22	1.1	0.0271
	17691764	NM_001100565	Peli1	pellino 1	1.1	0.0277
	17613350	NM_001024775	Zfp110	zinc finger protein 110	1.1	0.0211
	17790301	NM_001014055	Tmem209	transmembrane protein 209	1.1	0.0406
	17653701	NM_001009619	Nubp1	nucleotide binding protein 1	1.1	0.022
	17718797	NM_001105751	Hivep1	human immunodeficiency virus type I enhancer binding protein 1	1.1	0.0034
	17678479	NM_001024254	Taok3	TAO kinase 3	1.1	0.0271
	17664208	NM_001105900	Cggbp1	CGG triplet repeat binding protein 1	1.1	0.00286
	17658104	NM_001024270	Pelp1	proline, glutamate and leucine rich protein 1	1.1	0.0116
	17645095	NM_001100550	Slu7	SLU7 splicing factor homolog (S, cerevisiae)	1.1	0.0369
	17637391	ENSRNOT00000055013	Spn	sialophorin	1.1	0.0457
	17843885	NM_001025277	Bud13	BUD13 homolog (S, cerevisiae)	1.1	0.00467
	17811991	NM_001114599	RGD1560286	similar to DNA segment, Chr 4, ERATO Doi 22, expressed	1.1	0.022
	17698592	---	---	---	1.1	0.0172
	17620171	NM_001198653	Vwa3a	von Willebrand factor A domain containing 3A	1.1	0.048
	17815027	NM_001100540	Iah1	isoamyl acetate-hydrolyzing esterase 1 homolog (S, cerevisiae)	1.1	0.0319
	17704222	NM_001170472	RGD1309922	similar to 2610301G19Rik protein	1.1	0.0187
	17681879	ENSRNOT00000004735	B4galt3	UDP-Gal:betaGlcNAc beta 1,4-galactosyltransferase, polypeptide 3	1.1	0.0241
	17782961	ENSRNOT00000021576	Pip	prolactin induced protein	1.1	0.0297
	17618548	NM_001191630	Prkrir	protein-kinase, interferon-inducible double stranded RNA dependent inhibitor, repressor of (P58 repressor)	1.1	0.0405
	17650915	NM_147144	Casc3	cancer susceptibility candidate 3	1.1	0.00819
	17819882	NM_001036626	Zfp36l2	zinc finger protein 36, C3H type-like 2	1.1	0.00744
	17828910	NM_001134886	Vps13b	vacuolar protein sorting 13 homolog B (yeast)	1.1	0.0254
	17836009	ENSRNOT00000008193	Cpsf6	cleavage and polyadenylation specific factor 6, 68kDa	1.1	0.00891
	17615383	NM_001008775	U2af1l4	U2 small nuclear RNA auxiliary factor 1-like 4	1.1	0.00185
	17777448	NM_001039024	RGD1311267	similar to RIKEN cDNA 4931426K16 gene	1.1	0.0459
	17664904	NM_012791	Dyrk1a	dual-specificity tyrosine-(Y)-phosphorylation regulated kinase 1A	1.1	0.0287
	17707139	NM_001025143	LOC498606	hypothetical protein LOC498606	1.1	0.000337
	17676331	NM_001163320	Get4	golgi to ER traffic protein 4 homolog (S, cerevisiae)	1.1	0.0243
	17786455	NM_001000900	Olr830	olfactory receptor 830	1.1	0.0345
	17785591	ENSRNOT00000014353	Nr2c2	nuclear receptor subfamily 2, group C, member 2	1.1	0.0118
	17634940	XM_001062815	Pcf11	PCF11, cleavage and polyadenylation factor subunit, homolog (S, cerevisiae)	1.1	0.0378
	17872821	NM_001108021	Klhl15	kelch-like 15 (Drosophila)	1.1	0.0436
	17834926	---	---	---	1.1	0.0451
	17876198	NM_001172103	Pim2	pim-2 oncogene	1.1	0.014
	17668030	NM_001113747	Setd4	SET domain containing 4	1.1	0.0248
	17843017	NM_001025284	Rpusd4	RNA pseudouridylate synthase domain containing 4	1.1	0.0164
	17684614	NM_001047926	LOC498236	LRRGT00186	1.1	0.00666
	17734475	BC105747	RGD1562218	similar to RIKEN cDNA 0610039J04	1.1	0.0383
	17830156	NM_001007707	Fam203a	family with sequence similarity 203, member A	1.1	0.0134
	17727831	NM_001170478	Zfp319	zinc finger protein 319	1.1	0.00143
	17756321	NM_133300	Ddx39b	DEAD (Asp-Glu-Ala-Asp) box polypeptide 39B	1.1	0.0119
	17614071	NM_001109410	Trappc6a	trafficking protein particle complex 6A	1.09	0.0124
	17630673	NM_001107491	Cxcl17	chemokine (C-X-C motif) ligand 17	1.09	0.0172
	17779211	---	---	---	1.09	0.00588
	17880385	XM_344518	RGD1560648	similar to DJ-1 protein	1.09	0.0487
	17803181	---	---	---	1.09	0.0371
	17833977	ENSRNOT00000041277	Ptbp1	polypyrimidine tract binding protein 1	1.09	0.00998
	17669813	ENSRNOT00000029842	Ubxn7	UBX domain protein 7	1.09	0.00908
	17787779	---	---	---	1.09	0.0248
	17708640	NM_001004107	Tacc1	transforming, acidic coiled-coil containing protein 1	1.09	0.0452
	17739764	NM_030860	Mef2d	myocyte enhancer factor 2D	1.09	0.0463
	17873242	NM_001191723	Taf1	TAF1 RNA polymerase II, TATA box binding protein (TBP)-associated factor	1.09	0.0202
	17728877	NM_022962 // NM_022962 // NM_022962	Lphn1 // Lphn1 // Lphn1	latrophilin 1 // latrophilin 1 // latrophilin 1	1.09	0.0282
	17874668	NM_001108259	Htatsf1	HIV-1 Tat specific factor 1	1.09	0.0353
	17826665	NM_139252	Ppap2c	phosphatidic acid phosphatase type 2c	1.09	0.0428
	17723459	ENSRNOT00000026706	Isoc1	isochorismatase domain containing 1	1.09	0.0249
	17879979	NM_022673	Mecp2	methyl CpG binding protein 2	1.09	0.00913
	17721658	---	---	---	1.09	0.00969
	17743995	NM_001109468	Polr3g	polymerase (RNA) III (DNA directed) polypeptide G	1.09	0.0119
	17666736	XM_001058240	RGD1559917	similar to SMT3 suppressor of mif two 3 homolog 2	1.09	0.024
	17749515	---	---	---	1.09	0.0166
[truncated: 2,755 more rows]
